1  
2  
3  
4  
5  
6  
7  
8  
9  
10  
11  
12  
13  
14  
15  
16  
17  
18  
19  
20  
21  
22  
23  
24  
25  
26  
27  
28  
29  
30  
31  
32  
33  
34  
35  
36  
37  
38

## Unravelling specific diet and gut microbial contributions to inflammatory bowel disease

Gabriel Vasconcelos Pereira<sup>1,#</sup>, Marie Boudaud<sup>2,#</sup>, Mathis Wolter<sup>2,3</sup>, Celeste Alexander<sup>1</sup>,  
Alessandro De Sciscio<sup>2</sup>, Erica. T. Grant<sup>2,3</sup>, Bruno Caetano Trindade<sup>4</sup>, Nicholas A. Pudlo<sup>1</sup>,  
Shaleni Singh<sup>1</sup>, Austin Campbell<sup>1</sup>, Mengrou Shan<sup>4,7</sup>, Li Zhang<sup>4,7</sup>, Stéphanie Willieme<sup>2</sup>, Kwi  
Kim<sup>4</sup>, Trisha Denike-Duval<sup>5</sup>, André Bleich<sup>8</sup>, Thomas M. Schmidt<sup>1,4,6</sup>, Lucy Kennedy<sup>5</sup>, Costas A.  
Lyssiotis<sup>4,7</sup>, Grace Y. Chen<sup>4</sup>, Kathryn A. Eaton<sup>1</sup>, Mahesh S. Desai<sup>2,9,\$,\*</sup>, Eric C. Martens<sup>1,\$,\$,\*</sup>

### Affiliations:

<sup>1</sup>Department of Microbiology and Immunology, University of Michigan Medical School,  
Ann Arbor, Michigan, USA

<sup>2</sup>Department of Infection and Immunity, Luxembourg Institute of Health, 4354 Esch-sur-  
Alzette, Luxembourg

<sup>3</sup>Faculty of Science, Technology and Medicine, University of Luxembourg, 4365 Esch-sur-  
Alzette, Luxembourg

<sup>4</sup>Dept. of Internal Medicine, University of Michigan, Ann Arbor, Michigan, USA

<sup>5</sup>Unit for Laboratory Animal Medicine, University of Michigan, Ann Arbor, Michigan, USA

<sup>6</sup>Dept. of Ecology and Evolutionary Biology, University of Michigan, Ann Arbor, Michigan,  
USA

<sup>7</sup>Dept. of Molecular & Integrative Physiology, University of Michigan, Ann Arbor,  
Michigan, USA

<sup>8</sup>Institute for Laboratory Animal Science, Hanover Medical School, Hanover, Germany

<sup>9</sup>Odense Research Center for Anaphylaxis, Department of Dermatology and Allergy Center,  
Odense University Hospital, University of Southern Denmark, 5000 Odense, Denmark

#Authors contributed equally

\*Correspondence to: [emartens@umich.edu](mailto:emartens@umich.edu), [mahesh.desai@lih.lu](mailto:mahesh.desai@lih.lu)

§Lead author

§These authors jointly supervised this work

39 **Summary**

40 Inflammatory bowel disease (IBD) is a chronic condition characterized by periods of spontaneous  
41 intestinal inflammation and is increasing in industrialized populations. Combined with host genetic  
42 predisposition, diet and gut bacteria are thought to be prominent features contributing to IBD, but  
43 little is known about the precise mechanisms involved. Here, we show that low dietary fiber  
44 promotes bacterial erosion of protective colonic mucus, leading to lethal colitis in mice lacking  
45 the IBD-associated cytokine, interleukin-10. Diet-induced inflammation is driven by mucin-  
46 degrading bacteria-mediated Th1 immune responses and is preceded by expansion of natural killer  
47 T cells and reduced immunoglobulin A coating of some bacteria. Surprisingly, an exclusive enteral  
48 nutrition diet, also lacking dietary fiber, reduced disease by increasing bacterial production of  
49 isobutyrate, which is dependent on the presence of a specific bacterial species, *Eubacterium*  
50 *rectale*. Our results illuminate a mechanistic framework using gnotobiotic mice to unravel the  
51 complex web of diet, host and microbial factors that influence IBD.

52

53

54

55 **Main**

56 Inflammatory bowel disease (IBD) is characterized by periods of spontaneous  
57 inflammation in the gastrointestinal tract and occurs in people with underlying genetic variations  
58 that cause inappropriate immunological responses to intestinal antigens, especially ordinarily non-  
59 harmful symbiotic gut microbes [1]. Despite identification of hundreds of IBD-associated genetic  
60 polymorphisms [2], the precise mechanisms through which IBD develops have not yet been  
61 determined. Even when predisposing genetics exist, IBD does not always occur, suggesting that  
62 additional important triggers beyond host genetics and gut microbes are required [3].

63 The incidence of IBD is increasing in some industrializing countries [4] and in immigrant  
64 populations that move to already industrialized countries [5]. Dietary changes associated with  
65 industrialization (*e.g.*, decreased fiber intake, increased processed foods and emulsifiers) are  
66 emerging as potential “triggers” that enhance susceptibility to diseases like IBD [6-8], yet the  
67 underlying mechanisms of how dietary factors promote or suppress inflammation are still being  
68 determined. The physiology of the microbes inhabiting the gut is continuously influenced by diet,  
69 especially fiber polysaccharides that elude digestion in the upper gastrointestinal tract and arrive  
70 in the ileum and colon providing nutrients for microbes [9-11]. Several studies using murine  
71 models fed low fiber or “Westernized” diets have shown alterations in the microbiome that  
72 correlate with reduced integrity of the mucosal barrier, including increased activity of mucin-  
73 degrading bacteria and reduced mucus thickness [12, , 13] and increased mucus permeability [14].

74 Here, we investigated the specific contributions of dietary fiber and mucin-degrading gut  
75 bacteria to the development of spontaneous inflammation in mice lacking the human IBD-  
76 associated cytokine interleukin-10 (IL-10). In humans, loss of normal IL-10 production or either  
77 of its receptor subunits results in early onset IBD in infants and children [15]. Conventional *Il10*<sup>-/-</sup>  
78 mice develop spontaneous inflammation that is variable between mouse colonies and worsened by  
79 the presence of pathobionts like *Enterococcus faecalis* or *Helicobacter* spp. [16], while housing  
80 mice in specific-pathogen-free conditions [16] or deriving as germfree substantially reduces or  
81 eliminates inflammation [17]. It is therefore known that gut microbes are required for disease  
82 development in *Il10*<sup>-/-</sup> mice, however, the precise mechanisms potentiating disease progression in  
83 the presence of commensal bacteria that lack known or potential pathogenic qualities remain  
84 unknown.

85 Our data reveal that a combination of IL-10 loss, a gut microbiota containing mucin-  
86 degrading species and a low-fiber diet that increases bacterial mucus erosion are all required to  
87 elicit severe disease. At the same time, we fortuitously observed that the clinically validated dietary  
88 therapy exclusive enteral nutrition (EEN) partially inhibits colitis development, despite lacking  
89 dietary fiber, in part by promoting production of the bacterial metabolite isobutyrate. Our study  
90 represents an important step towards unraveling the positive and negative contributions of host  
91 genetics, gut microbial physiology and diet on a mechanistic level, and provides a potential path  
92 towards leveraging features of the IBD landscape that can be intentionally modified (diet,  
93 microbiome) to reduce the disease burden in people suffering from IBD.

94

### 95 **A combination of host genetic susceptibility, low dietary fiber and intestinal bacteria** 96 **exacerbate colitis**

97 We previously determined that colonization of wild-type germfree mice with a synthetic  
98 microbiota containing 14 species (SM14), which is composed of sequenced and metabolically  
99 characterized human gut bacteria, results in erosion of the colonic mucus layer and increased  
100 pathogen susceptibility when mice are fed a fiber-free (FF) diet [12]. These fiber-deprived mice  
101 do not develop spontaneous inflammation and notably mice colonized with the same SM14 and  
102 fed high fiber harbor fewer mucin-degrading bacteria and do not experience mucus erosion. To  
103 determine if diet- and microbiota-driven mucus erosion—and the correspondingly increased  
104 proximity of bacteria to host tissue—promotes disease in mice that are genetically susceptible to  
105 IBD, we introduced the SM14 synthetic microbiota into germfree *Il10*<sup>-/-</sup> mice. Of note, *Il10*<sup>-/-</sup> lines  
106 have been constructed in several murine strain backgrounds and we chose the C57BL/6J derived  
107 line (mouse facility: University of Michigan), which has been reported to be the most resistant to  
108 inflammation development [16]. We colonized adult 7-10 week old *Il10*<sup>-/-</sup> mice fed a standard  
109 mouse chow, which we call a fiber-rich (FR) diet, for 14 days and switched a subset of the mice  
110 to the FF diet after 14 days of colonization, monitoring body weight and microbiota changes for  
111 up to 60d (**Fig. 1A**). Colonized mice that remained on the FR diet maintained or gained weight  
112 and did not experience noticeable morbidity. In contrast, mice switched to the FF diet began losing  
113 weight 1–2 weeks after the diet switch and experienced 88.9% lethality by 60d (n=27; note that a  
114 humane endpoint of  $\geq 20\%$  loss of starting weight was used and animals that exceeded this were  
115 counted as lethalties). Histological examination of the intestines of FR and FF fed mice at the end

116 of the experiment (either 60d or sooner if mice succumbed to weight loss) revealed neutrophil  
117 infiltration, inflammation and epithelial damage that was most severe in the ceca of SM14-  
118 colonized FF-fed mice (**Fig. 1B–D**). Similar inflammation did not develop in wild-type mice with  
119 the same treatments (**Fig. 1D, Fig. Extended Data Fig. 1A–C**). Cecal measurements of  
120 neutrophil-derived lipocalin 2 (Lcn2) provided additional data that inflammation was most severe  
121 in SM14-colonized *Il10*<sup>-/-</sup> mice fed the FF diet (**Fig. 1E**) and generally mirrored trends in histology.  
122 Experimental treatments in which the individual variables for diet (FR, FF), colonization (SM14  
123 or germfree) and host genotype (wild-type or *Il10*<sup>-/-</sup>) were systematically manipulated supported  
124 the conclusion that severe inflammation and weight loss only develops in the context of three  
125 conditions: IL-10 deficiency, SM14 colonization and low-fiber diet (**Figs. 1D, E, Extended Data**  
126 **Fig. 1D**).

127 As expected, switching SM14-colonized mice to the FF diet rapidly induced a microbiota  
128 shift in favor of decreased fiber-degrading and increased mucin-degrading species in *Il10*<sup>-/-</sup> mice  
129 (**Extended Data Fig. 1E**). The same trend was observed in wild-type mice fed the FF diet, albeit  
130 with significantly increased levels of *Escherichia coli* and *Bacteroides thetaiotaomicron* in *Il10*<sup>-/-</sup>  
131 mice (**Extended Data Fig. 1E–G**). Both of these species have previously been shown to benefit  
132 from an inflamed environment [18, 19], in some cases by sharing iron-scavenging siderophores  
133 [20]. As expected from studies with wild-type mice fed low fiber [12, 13], feeding the FF diet to  
134 *Il10*<sup>-/-</sup> mice resulted in reduced mucus thickness (**Extended Data Fig. 1H–K**) that likely increases  
135 bacterial contact with the host. Moreover, using bacteria-sized fluorescent beads in an *ex situ* mucus  
136 penetrability assay [21] we determined the colonic mucus penetrability. Our results revealed  
137 significantly higher mucus penetrability and closer proximity of 1µm-sized beads to the host  
138 epithelium in FF-fed *Il10*<sup>-/-</sup> mice compared to their FR-fed counterparts, an effect that was not as  
139 pronounced in the wild-type mice with SM14 (**Fig. 1F, G, Extended Data Fig. 1L, M**). Plating  
140 livers and spleens from colonized mice that suffered FF-induced disease on media that support  
141 growth of SM14 species did not reveal systemic bacterial dissemination (not shown), suggesting  
142 that intestinal inflammation, resulting from a damaged mucus barrier and a potentially increased  
143 influx of microbial antigens to the local intestinal tissue, is the main cause of mortality.

144 Human disease associated with IL-10 dysfunction often presents as early or very early  
145 onset IBD in children and infants [15] and GF mice have underdeveloped immune and mucosal  
146 barriers [22] that could contribute to the disease phenotype observed in colonized adult mice. With

147 these points in mind, we modified our model to allow for microbiota transfer in the neonatal period  
148 by colonizing germfree *Il10<sup>-/-</sup>* adult parents fed the FR diet which allows pups to be exposed to the  
149 maternal microbiota beginning at birth. All 14 of the SM species were transmitted, although two  
150 of the more fastidious Firmicutes (*Faecalibacterium prausnitzii* and *Roseburia intestinalis*) were  
151 not transmitted to every pup, a phenomenon that did not appear to influence disease development.  
152 As anticipated, in pre-weaned, milk-fed pups born to FR-fed dams, the SM14 took on a  
153 composition that was similar to that observed in adult FF fed mice (**Extended Data Fig. 1N**) likely  
154 due to the lack of fiber and the fact that milk oligosaccharides share common several common  
155 glycosidic linkages with mucin *O*-glycans [23]. While there were no signs of disease development  
156 during the pre-weaning period, pups weaned to the FF diet began losing weight after ~40 days post  
157 weaning (dpw) (**Fig. 1H**) and experienced 100% mortality by 84 dpw (**Fig. 1I**). In most  
158 experiments, we harvested both FR and FF groups at 79 dpw (100 day old), in which case mortality  
159 among the FF mice was ~81.8% (**Extended Data Fig. 1O**). In contrast, all mice weaned to the FR  
160 diet survived to 79 dpw (**Extended Data Fig. 1O**) and a separate group of FR-fed mice showed  
161 100% survival when maintained for 129 dpw (150 days total) as did wild-type mice fed either diet  
162 (**Fig. 1I**). Weight loss in pups weaned to the FF diet corresponded with increasing fecal *Lcn2* that  
163 occurred around the same time (~40 dpw) of declining weight, further suggesting that weight loss  
164 is associated with increasing intestinal inflammation (**Fig. 1J**). Interestingly, *Il10<sup>-/-</sup>* mice with a  
165 specific pathogen free (SPF) microbiota and fed the FF diet did not lose weight as severely as those  
166 colonized with SM14 (**Fig. 1H**). Compared to SM14-colonized mice fed the FF diet, the SPF mice  
167 showed lower inflammation, measured by *Lcn2*, at 79 dpw (**Fig. 1K**), and less histological damage  
168 (**Extended Data Fig. 1P**), revealing that a more complex, murine microbiota does not promote  
169 the same level of disease in this model, a point that is addressed in more detail below. Interestingly,  
170 SPF mice fed the FF diet *did* exhibit reduced mucus thickness (**Fig. 1L**), although not as severe as  
171 SM14-colonized mice fed the FF diet, implying that it contains mucin-degrading bacteria capable  
172 of eroding this layer in a diet-dependent fashion but other factors may offset inflammation  
173 development.

174 The FR and FF diets differ substantially in several aspects of their macronutrient  
175 composition beyond fiber (**Supplemental Table 1**). To more directly test the contribution of fiber,  
176 we created modified versions of the FF diet in which 7.5% of the carbohydrate it contains (glucose)  
177 was removed and replaced with an equivalent amount of different, food grade purified fibers from  
178 oat, wheat or apple. A high sugar diet has been shown to promote inflammation, including in *Il10<sup>-/-</sup>*

179  $^{-/-}$  mice [24]. As a control for reducing the sugar concentration in our fiber supplemented diets, we  
180 created a diet that contained the same amount of highly digestible starch, effectively exchanging  
181 7.5% of free glucose for a polymeric form of the same sugar that should still be available to the  
182 host via upper GI digestion. Our data reveal that the presence of 7.5% fiber from either of the three  
183 sources, but not digestible starch, reduces inflammation measured by *Lcn2* (**Fig. 1M**) as well as  
184 weight loss and histopathology (**Extended Data Fig. 2A, B**). Even when all of the glucose (44%)  
185 was replaced with digestible starch, adult mice colonized with the SM14 developed disease (**Fig.**  
186 **1M, Extended Data Fig. 2A, B**). *Bacteroides ovatus*, a proficient degrader of both the pectic and  
187 hemicellulosic polysaccharides expected to be present in the supplemental fibers used [25], was  
188 one of the major responders to the fibers used in these experiments, increasing between 2–3 fold  
189 in relative abundance in the community and this increased proliferation generally occurred at the  
190 expense of mucin-degrading species like *Akkermansia muciniphila* or *Bacteroides caccae*  
191 (**Extended Data Fig. 2C–G**).

192 To determine if restoring dietary fiber to mice that had already been fed the disease-  
193 promoting FF diet is capable of blocking inflammation, we returned colonized adult mice, which  
194 ordinarily experience ~89% lethality by 60d, to the FR diet at either 30d or 40d (16 or 26 days  
195 after being switched to FF). Both groups of mice that were returned to a high-fiber diet exhibited  
196 no lethal weight loss (**Extended Data Fig. 2H**) and *Lcn2* levels and histology at 60d were  
197 significantly lower than mice maintained on the FF diet (**Fig. 1N, O**). Interestingly, fecal *Lcn2*  
198 measurements over time showed that both groups of mice experienced a peak of inflammation  
199 after fiber had been restored, which then began declining, indicating that low fiber induces  
200 disruption to the host–microbe homeostasis in which inflammation is a lagging effect that can  
201 eventually be reset (**Fig. 1N**).

202

### 203 **The status of the mucus layer is a critical determinant of inflammation development**

204 To more directly evaluate the disease-promoting role of mucin-degrading bacteria, we  
205 colonized adult *Il10<sup>-/-</sup>* mice with a more simple synthetic microbiota containing only the 10 species  
206 (“SM10”) that have previously been shown to be unable to grow on mucin oligosaccharides [12].  
207 Mice colonized with a microbiota that lacked the four mucin degraders exhibited 100% survival  
208 on the FF diet until 60d post colonization (n=7), lower cecal *Lcn2* at 60d (**Fig. 2A**) and reduced  
209 histological damage (**Fig. 2B**). Removal of the 4 known mucin-degrading bacteria also



210 corresponded with decreased mucus erosion (**Fig. 2C, Extended Data Fig. 3A**), suggesting that  
211 the damage they inflict on mucus integrity may be causal to the increased disease activity when  
212 they are present. Consistent with this idea, SM10-colonized mice that were switched to the FF diet  
213 for a total of 150d after colonization (136d after switch to FF) exhibited significantly better  
214 survival (50%), revealing that the presence of mucin-degrading bacteria accelerates disease  
215 development but that the presence of non-mucin-degrading bacteria will eventually elicit disease  
216 in the context of the dysregulated *Il10*<sup>-/-</sup> immune system and fiber deprivation (**Fig. 2D**).  
217 Interestingly, adding back single mucin-degrading bacteria to the SM10 community did not yield  
218 the same level of inflammation observed with the full 14-member community, indicating that  
219 multiple species may act synergistically to promote more severe disease (**Fig. 2A**). Consistent with  
220 the idea that low dietary fiber intake promotes the general proliferation of mucin-degrading  
221 bacteria, the mice colonized with SM10 plus a single mucin degrader all exhibited expansion of  
222 that mucin-degrading bacterium after the diet switch compared to SM14-colonized mice  
223 (**Extended Data Fig. 3B–G**). This is in contrast to mice colonized with the full SM14, which  
224 typically show expansion of *Akkermansia muciniphila* and *B. caccae* in response to low fiber  
225 (**Extended Data Fig. 3B**). Despite a lack of weight loss (not shown) and lower *Lcn2*, the presence  
226 of either *B. thetaiotaomicron* or *A. muciniphila* as the sole mucin-degrader produced histological  
227 inflammation in the cecum that was statistically identical to the full SM14 (**Fig. 2B,E**).

228 As a separate test of the protective role for mucus in this colitis model, which could  
229 potentially be influenced by the presence of dietary fiber independently of bacteria, we bred *Il10*<sup>-/-</sup>  
230 *Muc2*<sup>-/-</sup> double knockout (DKO) germfree mice, colonized them with the SM14 and fed either the  
231 FR or FF diets. As expected, these mice lost weight quickly (100% needed to be sacrificed before  
232 30d on FF and before 34d on FR; n=5 and 7, respectively) and showed severe inflammation and  
233 mortality regardless of diet (**Fig. 2F–J**). These results suggest that the high sugar content of the  
234 FF diet is not the main driver of the acute disease since the low sugar FR diet also allows  
235 inflammation when the mucus layer is genetically eliminated. Interestingly, inflammation in DKO  
236 mice developed throughout the lower intestine and was more severe in the colon than in the cecum  
237 (**Fig. 2I–K**). This is likely due to the mucus system being thinner and patchier in the cecum than  
238 in the colon [26]. Thus, when *Il10*<sup>-/-</sup> mice experience low fiber-induced mucus erosion, the secreted  
239 mucin barrier is likely to fail first in the cecum. In contrast, in DKO mice the uniform elimination  
240 of *Muc2* appears to promote more widespread inflammation that worsens more quickly in the  
241 colon.



## 242 **Mucin-degrading bacteria influence inflammatory immune pathways in *Il10*<sup>-/-</sup> mice**

243 Development of spontaneous intestinal inflammation is a complex process involving innate  
244 and adaptive immune responses, and the critical role of Th1/Th17 cells has been described in the  
245 *Il10*<sup>-/-</sup> colitis model in conventional/SPF settings (Keubler et al., 2015). Nevertheless, how specific  
246 microbial triggers influence the underlying immune pathways and how these immune responses  
247 develop temporally are less clear. We repeated the same experiments described above with a  
248 different line of *Il10*<sup>-/-</sup> mice in the same C57BL/6J background used above (mouse facility:  
249 University of Luxembourg) and observed similar weight loss in both adult and post-weaning FF-  
250 fed mice colonized with SM14 (**Extended Data Fig. 3H–J**), validating that these results are robust  
251 and repeatable in a second laboratory. Cytokine measurements in cecal tissues revealed expected  
252 increases in IBD-associated markers IL-1 $\beta$ , IL-6, IL-17, IL-22, IL-23, TNF- $\alpha$  and IFN- $\gamma$  in fiber-  
253 deprived *Il10*<sup>-/-</sup> mice that were either colonized with SM14 as adults (**Extended Data Fig. 3K–P**)  
254 or colonized at birth from maternal exposure (**Extended Data Fig. 3Q–Y**). In addition, we  
255 observed that *Il10*<sup>-/-</sup> mice colonized maternally from birth with the SM10 lacking mucin degraders  
256 recapitulated the reduced disease phenotype observed in adults (**Extended Data Fig. 3I, J**). In  
257 these SM10-colonized mice, fiber deprivation only slightly induced cecal expression of IL-17, IL-  
258 22 and TNF- $\alpha$ , which were elevated in SM14-colonized mice (**Extended Data Fig. 3Q–Y**). Given  
259 the contrasting colitis phenotypes in FF-fed SM14- and SM10-colonized *Il10*<sup>-/-</sup> mice, our model  
260 provides opportunities to investigate the contributions of not only the microbial triggers but the  
261 regionality, timing and severity of underlying inflammatory immune pathways associated with  
262 increased microbial mucin foraging driven by fiber deficiency.

263 In SM14-colonized mice that were weaned to the FF diet, inflammation could be detected  
264 in the cecum via increased *Lcn2* as early as 35 dpw and this effect was absent in mice colonized  
265 from birth with SM10 (**Fig. 3A**). SM14 mice weaned onto the FF diet also exhibited low fecal  
266 *Lcn2* at 35 dpw, consistent with data shown above and supporting the conclusion that disease  
267 develops earlier in the cecum in mice with intact mucus production (**Fig. 3A**). An expansion of  
268 natural killer (NK) cells was detectable in the cecum of FF-fed mice as soon as 35 dpw (**Fig. 3B,**  
269 **left panel**), and this diet-dependent expansion was similar in SM10- and SM14-colonized ceca.  
270 Interestingly, NK cells expanded in the colons of both FR and FF-fed SM14-colonized mice as  
271 soon as 35 dpw, but not in the colons of SM10-colonized mice (**Fig. 3B, right panel**). This  
272 observation further suggests that the presence of mucin-degrading bacteria is more important to  
273 elicit responses in the colon where the mucus system is thicker and mucus erosion is required to

274 increase contact with bacterial antigens. Further supporting region-specific development of host  
275 responses, FF-fed germfree *Il10*<sup>-/-</sup> mice, but not WT germfree mice, showed increased NK cells in  
276 the cecum, but not in the colon, at 79 dpw compared to FR-fed controls, implying that long-term  
277 fiber deprivation can increase NK cell infiltration in the cecum independently of the microbiota  
278 **(Extended Data Fig. 4A, B).**

279 While NK cells were more abundant at 35 days and later decreased, T cell recruitment  
280 (especially CD4<sup>+</sup> T cells) increased over time in both the cecum and colon of colonized *Il10*<sup>-/-</sup> mice  
281 **(Fig. 3C and Extended Data Fig. 5A, B).** In the ceca of colonized *Il10*<sup>-/-</sup> mice, fiber deprivation  
282 increased both CD4<sup>+</sup> and CD8<sup>+</sup> T cell populations by 35 dpw, with CD4<sup>+</sup> T cells increasing further  
283 by 79 dpw independently of the diet **(Fig. 3C, D).** In the ceca of GF *Il10*<sup>-/-</sup> mice and SM14-  
284 colonized WT mice, CD8<sup>+</sup> T cells and CD4<sup>+</sup> T cells were also more abundant in FF-fed than in  
285 FR-fed mice, suggesting that fiber deprivation induces T cell recruitment through multiple paths  
286 and not all of these are regulated by the microbiota and IL-10 **(Fig. 3D, E and Extended Data**  
287 **Fig. 4A,B).**

288 Consistent with previous descriptions of *Il10*<sup>-/-</sup> colitis in conventional mice (Keubler et al.,  
289 2015), both SM10- and SM14-colonized mice generally exhibited infiltration of Th1 and Th17  
290 cells over time. Especially for Th17 cells, this infiltration was higher in FF-fed mice in both the  
291 cecum **(Fig. 3E)** and the colon **(Fig. 3F)**. While Th17 cells reached nearly equivalent levels at 79  
292 dpw in SM10 and SM14-colonized ceca **(Fig. 3E)**, overall levels were lower in the SM10-  
293 colonized colons compared to SM14. Furthermore, fiber deprivation increased Th1 levels in the  
294 SM14-colonized colons, but not in the SM10-colonized ones **(Fig. 3F)**, consistent with the weight  
295 loss observed only in FF-fed SM14 colonized animals. In line with the readouts mentioned above,  
296 this observation supports the idea that the role of mucin-degrading bacteria is more important in  
297 the colon where erosion of mucus facilitates the induction of the anti-microbial Th1 responses. To  
298 provide functional support to these immune cell profiles, we compared levels of Th1- and Th17-  
299 type cytokine transcripts in ceca and mesenteric lymph nodes using qPCR for 35 and 79 dpw. Fiber  
300 deprivation led to increased expression of Th1 (IFN- $\gamma$ , TNF- $\alpha$ , IL-6, IL-12) and Th17 cytokines  
301 (IL-17F, IL-22, IL-23 and TGF- $\beta$ ), as well as the mucin-inducing cytokine IL-13 in SM14-  
302 colonized *Il10*<sup>-/-</sup> mice **(Extended Data Figs. 3Q-Y and 5C).** These cytokine responses tended to  
303 develop more slowly in SM10-colonized ceca compared to those with SM14 **(Extended Data Fig.**  
304 **3Q-Y).** In the colon-draining mesenteric lymph nodes (MLNs) where naïve T cells get activated  
305 and polarized, the Th17-related cytokines, IL-17F and IL-22, were increased by fiber deprivation

306 in both SM10- and SM14-colonized mice, while the Th1-polarizing cytokines IFN- $\gamma$ , IL-6 and IL-  
307 12 were only increased in SM14-colonized mice, consistent with a regional dependence on mucin-  
308 degrading bacteria to develop Th1 responses (**Fig. 3G and Extended Data Fig. 5C**).

309 Despite the IL-10 deficiency, Foxp3<sup>+</sup> regulatory T cell (Treg) recruitment was also  
310 detectable and higher during FF feeding of SM14 *Il10*<sup>-/-</sup> mice (**Fig. 3H, Extended Data Fig. 5D**).  
311 This expansion being independent of IL-10 suggests a mechanism driven by other regulatory  
312 mediators such as TGF- $\beta$ , whose transcript levels increased in SM14-colonized cecal tissues as  
313 soon as 35 dpw (**Extended Data Fig. 3Y**). Regulatory T cells expressing Tbet or ROR $\gamma$ t have been  
314 proposed as counter-regulators of inflammatory Th1 and Th17 cells, respectively [27, 28].  
315 Consistent with this, the abundance of Tbet<sup>+</sup> Treg cells follow the same trends as inflammatory  
316 Th1 cells with higher levels in FF-fed, SM14-colonized mice (**Fig. 3H and Extended Data Fig.**  
317 **5E**). By contrast, the highly suppressive ROR $\gamma$ t<sup>+</sup> Treg population was reduced at 35 dpw in the  
318 colon (**Fig. 3H**) and at 79 dpw in the cecum of FF-fed, SM14-colonized *Il10*<sup>-/-</sup> mice (**Extended**  
319 **Data Fig. 5E**), thus favoring the inflammatory responses. In addition, Gata3<sup>+</sup> Tregs were increased  
320 in fiber-deprived germfree ceca (**Extended Data Fig. 4B**) and colonized colons (**Fig. 3H**). While  
321 their role in the specific regulation of type 2 inflammatory cells is still unclear, they may constitute  
322 a reservoir of Tregs required for tissue repair by 79 dpw in colonized colons [29, 30]. Finally,  
323 despite the general expansion of Treg, early (35 dpw) loss of the highly suppressive ROR $\gamma$ t<sup>+</sup> subset  
324 and the IL-10 deficiency are likely to allow the Th1/Th17 responses to flourish in FF-fed, SM14  
325 mice. Together, these results reveal strong Th1/Th17 immune pathways induced by fiber  
326 deprivation, differentially regulated by microbial community members and host genetics, in a  
327 time- and intestinal site-specific manner.

### 328 329 **Alterations to IgA–microbiota interactions precede inflammation**

330 Since coating with immunoglobulin A (IgA) has been proposed to identify bacteria that are  
331 potentially more colitogenic [31], we next focused on how low fiber-induced inflammation  
332 development alters bacterial IgA coating in our *Il10*<sup>-/-</sup> model. The IgA response is a common anti-  
333 microbial response in the gut and is usually upregulated in colitis in human and mouse models  
334 [32]. Mirroring the trend observed for early inflammation (**Fig. 3A**), soluble IgA titers were  
335 increased in the cecum but not feces of FF-fed SM14-colonized *Il10*<sup>-/-</sup> mice at 35 dpw compared  
336 to FR (**Fig. 4A**). However, prolonged FF-feeding (79 dpw) resulted in depletion of IgA-producing  
337 plasma cells in both the cecum and colon (**Fig. 4B**). This loss was also observed in FF-fed WT

338 mice that were colonized with SM14 (**Fig. 4B**), suggesting a diet-driven effect on IgA-producing  
339 cell loss rather than a depletion caused by the absence of IL-10. This is consistent with a published  
340 report showing reduced titers of serum IgA and less IgA<sup>+</sup> B cells in the small intestine of wild-  
341 type mice fed a zero-fiber diet compared to a high-fiber diet [33]. In parallel with reduced IgA-  
342 producing cells after FF-feeding, the proportion of IgG-producing cells was increased at 35 and  
343 79 dpw in both the cecum and colon of SM14-colonized *Il10*<sup>-/-</sup> mice (**Extended Data Fig. 6A,B**).  
344 Consistent with the high production of Th1 cytokines in the presence of mucolytic bacteria, FF-  
345 feeding increased the proportion of IgG-producing cells only in SM14- but not in SM10-colonized  
346 colons (**Extended Data Fig. 6B**) [34].

347 We next sought to determine how changes in IgA-producing cells are reflected in bacterial  
348 IgA coating. Intriguingly, analysis of IgA-coated bacteria revealed the presence of 2 differentially  
349 coated populations in FR-fed mice: a large population with low-coating and a smaller population  
350 with high coating and we observed that the highly coated population was nearly absent in SM14-  
351 colonized mice fed the FF diet (**Fig. 4C**). Consistent with previous studies [32], the amount of total  
352 IgA-coated bacteria (both populations combined) was higher in FF-fed mice than in FR-fed mice  
353 by 79 dpw (**Fig. 4D, left**). However, only the proportion of low-coated bacteria increased in FF-  
354 fed mice (**Fig. 4D, right**), while the highly-coated bacteria were diminished in fiber-deprived mice,  
355 as early as 21 days of feeding (**Fig. 4D, middle**). Interestingly, the FF diet-induced increase in  
356 total IgA-coating by 79 dpw was not observed in SM10-colonized mice, but was observed in SPF  
357 *Il10*<sup>-/-</sup> mice and SM14-colonized WT mice, supporting a mechanism driven by the microbiota  
358 rather than the IL-10 deficiency (**Fig. 4E, left**). However, highly coated bacteria were diminished  
359 in SM10-colonized mice as in SM14-colonized mice as soon as 21 dpw (**Fig. 4E, middle and**  
360 **Extended Data Fig. 6C**) and low-coated bacteria only slightly increased by 79 dpw (**Fig 4E,**  
361 **right**), suggesting a mechanism that is partly driven by the presence of mucolytic bacteria.

362 Given the altered pattern of IgA coating and the fact that IgA coating has been proposed as  
363 a marker of bacteria with more colitogenic potential [31], we examined the IgA coating of  
364 individual SM14 bacterial members. Consistent with the overall early loss of highly coated  
365 bacteria, changes in IgA-coating indexes in the SM14 community appeared as soon as 21 days of  
366 feeding (**Fig. 4F**). Among the SM14 members, *A. muciniphila*, *D. piger*, *E. coli* and *C. aerofaciens*  
367 showed reduced IgA coating index (ICI) values at one or both timepoints in FF-fed *Il10*<sup>-/-</sup> mice. In  
368 wild-type mice, this FF diet-induced reduction in IgA coating was less severe for *A. muciniphila*,  
369 but more pronounced for *D. piger* and *C. aerofaciens*, revealing that IL-10 deficiency affects the

370 IgA-coating profile of commensals in a species-dependent manner. In contrast, *E. rectale* showed  
371 a low ICI in FR-fed mice and this increased with FF-feeding, a condition that corresponds to it  
372 being present at very low levels (and therefore not contributing much to overall coating  
373 measurements), likely due to its inability to compete for mucin-derived nutrients. The causes and  
374 effects of variations in IgA coating are still being determined. However, our results demonstrate  
375 that different combinations of microbial colonization, diet and host immune status can alter both  
376 the amount and affinity of intestinal IgA, as well as the bacteria that it targets. Along with the data  
377 shown above, our results suggest the possibility that fiber deprivation initiates early disruptions in  
378 IgA–microbiota interactions along with a loss of IgA-producing plasma cells allowing *A.*  
379 *muciniphila* and *E. coli* to expand in the absence of proper IgA coating and contribute to colitis.

380

### 381 **Different microbiota alter the outcome of diet-induced colitis in *I110*<sup>-/-</sup> mice**

382 Because we observed that SPF mice fed the FF diet did not develop inflammation with the  
383 same severity as those colonized with SM14 (**Fig. 1H,K**), despite having thinner mucus (**Fig. 1L**),  
384 we performed co-housing experiments in which pups born to SPF- and SM14-colonized mothers  
385 were mixed at weaning and exposed to each other's microbiomes. Co-housing SM14-colonized  
386 *I110*<sup>-/-</sup> pups with SPF mice prevented the weight loss phenotype observed in response to feeding  
387 the FF diet (**Extended Data Fig. 7A**). However, it did not reduce cecal inflammation as measured  
388 by both cecal *Lcn2* (**Fig. 5A**) or histology (**Fig. 5B**), indicating that the weight loss and  
389 inflammation phenotypes can be uncoupled in the presence of different microbes perhaps due to  
390 the timing of barrier disruption or other changes in microbiota metabolism. Mice that were born  
391 to SPF mothers showed a more variable response to co-housing with SM14-colonized pups, with  
392 only some of these mice developing disease that was often similar in severity to FF-fed, SM14-  
393 colonized mice (**Fig. 5A,B**). Time course analysis of fecal *Lcn2* revealed a larger difference  
394 between co-housed and non-co-housed SPF mice than cecal measurements and this marker  
395 increased in co-housed SPF mice after 65 days, a trend that was nearly identical to SM14 mice  
396 (**Fig. 5C**). Although inflammation was variable in co-housed SPF mice, there was a positive  
397 correlation in the two inflammatory measurements for this group (**Fig. 5D**).

398 The SPF pups are naturally colonized with a natively complex microbiota beginning at  
399 birth, whereas the SM14 pups receive a simpler microbiota of known composition. The fact that  
400 co-housed SPF pups develop worse inflammation compared to their littermates that are not co-

401 housed suggested that some of the SM14 bacteria can invade the murine SPF microbiota and  
402 worsening disease, perhaps synergizing with native murine microbes that perform some of the  
403 same metabolic or immunostimulatory functions of other SM14 members. To determine which  
404 SM14 species invaded the SPF microbiota and when, we performed 16S rRNA gene sequencing  
405 on fecal samples from co-housed mice from both groups over the 100d time course. Our analysis  
406 revealed that only some of the SM14 bacteria are transferred to SPF mice, a finding that might be  
407 expected with human gut bacteria invading a more complex, mouse-adapted microbiota. However,  
408 at least 6 members of the SM14 could be detected in co-housed SPF mice, often transiently or at  
409 the very end of the time course when inflammation had begun to develop (**Fig. 5E-G, Extended**  
410 **Data Fig. 7B-J**). The most prominent of these invading bacteria was the human commensal *E. coli*  
411 strain HS, which appeared in co-housed SPF mice around 22 dpw, prior to the onset of  
412 inflammation, and gradually increased, eventually reaching levels >10% in most mice (**Fig. 5E**).  
413 Two of the mucin-degrading SM14 bacteria (*A. muciniphila* and *Ba. intestinhominis*) showed a  
414 similar trend, albeit reaching lower levels and with variability among individual mice (**Fig. 5F,G**).  
415 Four other SM14 bacteria (*C. aerofaciens*, *B. uniformis*, *B. thetaiotaomicron* and *B. caccae*)  
416 showed transient, small increases around the time that inflammation was increasing (~44 dpw) and  
417 these organisms decreased thereafter (**Extended Data Fig. 7B-J**). A test of whether or not weekly  
418 gavages of *E. coli* HS into SPF mice that were otherwise not exposed to additional SM14 bacteria  
419 did not support that conclusion that this species is the sole cause of increased inflammation  
420 (**Extended Data Fig. 7K,L**), suggesting that more complex microbial interactions are involved.

421

## 422 **Certain gut bacteria and metabolites associated with exclusive enteral nutrition prevent** 423 **inflammation**

424 A notable characteristic of the FF diet that we used is that its macronutrient composition  
425 (**Supplemental Table 1**) resembles some exclusive enteral nutrition (EEN) diets that are used  
426 clinically to treat some IBD presentations. EEN diets often contain low or no fiber [35] and have  
427 proven to be effective at inducing IBD remission in humans, although the precise mechanism(s)  
428 of action is still unknown [36]. Since dysfunction in IL-10 signaling is just one of several host  
429 pathways implicated in IBD, it is possible that this particular immune signaling axis is sensitive to  
430 lack of fiber, whereas others are not and those are the ones that benefit from EEN. To determine  
431 if an EEN diet that lacks fiber promotes inflammation in our gnotobiotic *Il10*<sup>-/-</sup> model, we weaned



432 SM14-colonized pups onto a commercial EEN diet, which is normally taken as a liquid but in this  
433 case was freeze-dried, pelleted and sterilized by gamma irradiation (water was provided *ad*  
434 *libitum*). The average weight trajectories of 15 mice (3 separate experiments) supported the  
435 conclusion that the low fiber EEN diet promotes some disease development, although not as severe  
436 as the FF diet (**Fig. 6A**). Cecal Lcn2 measurements and histology further revealed a wide amount  
437 of variation in the disease present in individual animals, with some mice resembling healthy FR-  
438 fed mice, some resembling diseased FF-fed mice and some intermediate (**Fig. 6B,C**). Interestingly,  
439 the EEN diet increased the proportion of IgA-coated bacteria as soon as 21dpw and conserved the  
440 high-coated population compared to mice fed FF (**Extended Data Fig. 8**), suggesting immuno-  
441 regulatory properties distinct from both the FR and FF diets. Despite experiencing less  
442 inflammation, the EEN mice still exhibited reduced mucus thickness, which we expected given  
443 the lack of fiber in the formula used (**Fig. 6D**). Measurements of short- and branched chain fatty  
444 acids revealed that mice fed the EEN diet had elevated amounts of the branch-chained fatty acid  
445 (BCFA) isobutyrate (**Fig. 6E**). While isobutyrate varied between 7-281  $\mu\text{Mol/g}$  cecal contents,  
446 high levels were only weakly correlated with low inflammation (**Fig. 6F**). Isobutyrate is an isomer  
447 of the more widely studied, anti-inflammatory short-chain fatty acid butyrate, which did not  
448 increase, and isobutyrate is derived from L-valine fermentation by certain gut bacteria [37].  
449 Interestingly, the other two BCFAs (2-methyl butyrate and isovalerate) did not increase despite  
450 being present at similar abundance in soy and milk protein [38], the two dietary proteins used in  
451 the EEN formulation (**Fig. 6E**). This suggests that the increase in isobutyrate may not be  
452 attributable to increased bulk dietary protein fermentation, which would be expected to increase  
453 all three BCFAs. Providing either isobutyrate or butyrate (both 35 mM) in the drinking water of  
454 pups weaned onto the disease-promoting FF diet decreased weight loss (**Fig. 6G**) as well as the  
455 amount of inflammation observed (**Fig. 6H,I**), revealing that either of these molecules can offset  
456 the diet- and microbiome-induced damage observed in this model.

457 Feeding the EEN diet promoted changes in the composition of the SM14, which most  
458 notably included a ~250-fold increase in the levels of *E. rectale* (**Fig. 6J**). While this Firmicute is  
459 known to produce butyrate, measurements of culture supernatants from 13 of the SM species in  
460 medium supplemented with L-valine plus other peptides did not reveal that *E. rectale* produces  
461 isobutyrate under the medium conditions tested. Rather, this metabolite was produced by all 4 of  
462 the *Bacteroides*, plus *M. formatexigens* (**Fig. 6K**). Nevertheless, to determine if the large increase



463 in *E. rectale* abundance was functionally connected with production of isobutyrate, we bred  
464 neonatal mice born to parents harboring the SM14 community but lacking *E. rectale* (“SM13  
465 minus *E. rectale*”) and fed them the EEN diet. Consistent with a causal role (indirect or direct) for  
466 *E. rectale* in isobutyrate production, mice lacking *E. rectale* failed to produce isobutyrate, as well  
467 as butyrate as expected (**Fig. 6L**). These mice also exhibited increased lethality (62.5% survival at  
468 100d) relative to EEN fed mice harboring the full SM14 (**Fig. 6M**), although there was not a  
469 significant increase in cecal *Lcn2* levels relative to the EEN/SM14 group (**Fig. 6N**).

470

## 471 **Summary and prospectus**

472 The pathophysiology of IBD is complex and variable, in part because of the large number  
473 of different genetic contributions that combine with diverse environmental, microbial and dietary  
474 triggers that are known or hypothesized to influence its development. The diet-driven  
475 inflammation model that was developed and investigated in this study provides both a case study,  
476 in which potential contributing factors to IBD can be explored at mechanistic levels, as well as a  
477 more general experimental paradigm in which host genetic, immunological, microbiota and dietary  
478 factors can be systematically manipulated to examine their effects on disease progression. As  
479 examples of spontaneous, genetically driven intestinal inflammation models continue to be  
480 identified and developed [39-41], the ability to work with these murine models in gnotobiotic  
481 conditions and with defined diets holds the potential to uncover foundational principles about this  
482 complex disease.

483 The link between low dietary fiber and compromised thickness and/or permeability of the  
484 mucus layer has been emerging through several studies [12-14]. Here, we make a direct connection  
485 between the dietary fiber-gut microbiome axis in the context of IBD genetics, albeit in a way that  
486 depends on the specific bacteria present (SM14 vs. SPF). The discovery that the EEN diet tested  
487 exerts partial protection against inflammation was unexpected but may be unsurprising given the  
488 complexity of diet-microbiome-host interactions in the gut. The EEN diet clearly holds the  
489 potential to elicit mucus layer erosion, as well as inflammation, in this murine model, which we  
490 attribute to its lack of fiber along with other potential contributing factors. However, the finding  
491 that isobutyrate production may partially offset the development of inflammation, in a manner that  
492 is dependent on the presence of *E. rectale*, provides exciting opportunities to explore new  
493 microbiome pathways that are both influenced by diet and can exert beneficial effects. Identifying

494 the critical bacteria in our SM14 and their corresponding pathways for isobutyrate production will  
495 be essential and could illuminate why ~15% of patients given EEN do not respond [42], perhaps  
496 because they are missing these bacteria/pathways.

497 Many questions remain regarding the development of the multifactorial diseases  
498 encompassed under the term IBD. While host genetic susceptibility is a mostly permanent trait  
499 that is difficult to repair, an exception being stem cell transplant in children lacking IL-10 signaling  
500 [43], the microbiome and especially diet are factors that could be manipulated to delay or reverse  
501 disease. Ever since the discovery that rearing *Il10*<sup>-/-</sup> mice under germfree conditions abrogates  
502 inflammation [17], there has been substantial interest in finding specific bacteria or bacterial  
503 combinations that elicit inflammation when added back to these animals. This search has yielded  
504 significant insight into the contributions of bacteria with known pathogenic qualities, such as  
505 *Helicobacter* spp., *Enterococcus faecalis* and adherent invasive *E. coli* [16]. However, roles for  
506 specific commensal bacteria have also been established using gnotobiotic mice [44], albeit without  
507 a clear understanding of the mechanism(s) involved. Based on the data presented here, we propose  
508 a model that is focused more on the influence of positive and negative bacterial metabolic  
509 pathways and not on specific taxa. The rationale for this view is that metabolic pathways like  
510 mucin degradation can be present in diverse bacteria and these organisms may fulfill similar roles  
511 in eroding mucus. In contrast, strains of the same species can vary in key metabolic capabilities,  
512 including mucus degradation, which is known to vary substantially among some strains of  
513 *Bacteroides* [45] and likely other groups. If one considers the effects of the microbiome on IBD  
514 development to be a cumulative series of positive and negative stimuli caused by the particular  
515 behaviors and metabolites exhibited by the microbes present, it should be possible to optimize  
516 beneficial processes (e.g., butyrate, isobutyrate) while reducing detrimental events like mucus  
517 erosion. While some of these levers can be manipulated through diet, a promising path for  
518 intervention may eventually include adding or replacing specific bacterial taxa within a person's  
519 individual microbiota with more optimal strains or perhaps even those that are engineered to  
520 increase beneficial metabolites.

521

## 522 **Materials and Methods**

### 523 **Animal models, colonization diet and sample processing**

524 Animal experiments at the University of Michigan followed protocols approved by the  
525 University of Michigan Institutional Animal Care and Use Committee (IACUC) . Germ-free  
526 B6.129P2-II10tm1Cgn/JZtm mice (Institut für Versuchstierkunde und Zentrales Tierlaboratorium,  
527 Hannover, Germany) and wild-type C57BL/6J (University of Bern, Switzerland) were bred at the  
528 animal facility of the University of Luxembourg and underwent protocols approved by the Animal  
529 Experimentation Ethics Committee of the University of Luxembourg and the Ministre de  
530 l’Agriculture, de la Viticulture et du Development rural du Grand-Duché du Luxembourg (LUPA  
531 2020/20). Germfree males and females were colonized at 7–10 weeks of age and none of these  
532 mice was involved in any previous experiments/treatments. Mice were either housed alone or in  
533 groups of appropriate gender, litter, and dietary experiments. Food and autoclaved distilled water  
534 were provided ad libitum. Mice were weighed and monitored at least weekly for diarrhea,  
535 prolapses, and general health state and this was increased to daily monitoring in animals that began  
536 experiencing weight loss. The *Muc2*<sup>-/-</sup> mice, crossed to C57BL/6J background, were obtained from  
537 Leonard Augenlicht (Albert Einstein University). For the generation of *Il10*<sup>-/-</sup> *Muc2*<sup>-/-</sup> double  
538 knockout (DKO), the single KO mice were crossed to obtain double heterozygous mice until  
539 generation of *Il10*<sup>-/-</sup> *Muc2*<sup>+/-</sup>. Full double KO mice developed spontaneous prolapse in germ-free  
540 condition during prolonged breeding periods, thus, the *Il10*<sup>-/-</sup> *Muc2*<sup>+/-</sup> mice were used to generate  
541 the double KO mice used for all experiments. Genotyping was performed by extracting DNA from  
542 ear punches (Transnetyx). Mice were gavaged with the synthetic microbiota at 6–8 weeks and  
543 proceeded to diet change as previously described. The synthetic microbiota bacteria were grown  
544 in their respective medium (Desai, 2016) or a modified YCFA medium [46] prior to community  
545 assembly for gavages. The bacteria were cultivated under anaerobic atmosphere maintained with  
546 a gas mixture (85% N<sub>2</sub>, 10% H<sub>2</sub>, 5% CO<sub>2</sub>) to an optical density (absorbance 600nm) ranging from  
547 0.5 to 1.0. The communities were assembled by mixing equal volumes of each specific bacterium  
548 and aliquoted into sealed screw cap tubes with its own headspace. Each mouse was gavaged with  
549 0.2 mL of its specific community, depending on the experiment, with freshly prepared inocula for  
550 two-three consecutive days. A humane endpoint was used for mice that lost  $\geq 20\%$  of their starting  
551 weight and these mice were counted as lethalties in the weight loss and survival curves shown.  
552 Animals were euthanized using CO<sub>2</sub> asphyxiation for 5 minutes followed by cervical dislocation.  
553 The gastrointestinal tracts were retrieved quickly, to prevent autolysis, and the sections separated.  
554 Cecal and colon contents of each animal were flash frozen in liquid nitrogen and kept at -80°C  
555 until further use.

556 The FR diet (Lab Diet 5013) and FF diet (Envigo-Teklad TD.130343) have been previously  
557 described [12]. The EEN diet employed was Nestle Nutren 1.5, which was lyophilized and sent to  
558 Envigo rodent diets to be formed into pellets, bagged and gamma irradiated prior to use. Apple  
559 (Vitacel AF401), oat (Vitacel HF600-30) and wheat (Vitacel WF200) fibers were from J.  
560 Rettenmaier (Schoolcraft, MI, USA) and added to the FF diet at 7.5% w/w with a corresponding  
561 decrease in the amount of glucose in the FF diet. Soluble, highly digestible starch was provided  
562 by Cargill (Gel Instant 12412).

### 563 **DNA extraction**

564 DNA from fecal and cecal samples were isolated using a bead-beating phenol:chloroform  
565 extraction method followed by DNeasy Blood & Tissue Kit (QIAGEN, USA). In short, samples  
566 were weighed between 10-50mg and combined with acid-washed glass beads (212-300mm;  
567 Sigma-Aldrich, USA), 500uL Buffer A (200 mM NaCl, 200 mM Tris, 20 mM EDTA, 210 uL SDS  
568 (20% w/v, filter-sterelized), and 500 uL phenol:chloroform (Thermo Fisher Scientific, USA). The  
569 samples were disrupted using a Mini-Beadbeater-16 (Biospec Products, USA) for 3 minutes at  
570 room temperature and centrifuged (10,000 rpm, 4°C, 3 minutes). The aqueous phase was recovered  
571 and mixed with an equal volume of phenol:chloroform by gentle inversion and centrifuged (10,000  
572 rpm, 4°C, 3 minutes). The remaining aqueous phase was recovered and mixed with 500 µL of  
573 chloroform, mixed by gentle inversion, and centrifuged (10,000 rpm, 4°C, 3 minutes). Recovered  
574 aqueous phase was mixed with 1 volume of isopropanol and 1/10 volume of 3M sodium acetate,  
575 and stored at -80°C for 20 minutes for DNA precipitation. Samples were centrifuged (15000 rpm,  
576 4°C, 20 minutes), supernatant discarded, washed with 70% ethanol, air-dried, and resuspended in  
577 nuclease-free water. The sample DNA extracts were further purified with DNeasy Blood & Tissue  
578 kit, following manufacturer protocol (QIAGEN).

### 579 **RNA extraction, reverse transcription and qPCR**

580 Freshly retrieved ileal, cecal and distal colon tissues were transferred into RNAlater™  
581 (QIAGEN) and kept at 4°C up to a week. Then, RNAlater™ was removed and tissues were stored  
582 at -80°C until further use. Frozen tissues were transferred into 1 mL of TRIzol reagent  
583 (Invitrogen™), homogenized with a 5 mm metal bead on a bead beater for 8 min at 30Hz and  
584 centrifuged for 3 min at 13000 rpm, 4°C. The supernatant was recovered, mixed thoroughly with  
585 200 µl of chloroform and incubated at room temperature for 2-3 min before a centrifugation for 15  
586 min at 13000 rpm, 4°C. The aqueous phase was recovered, mixed again with an equal amount of

587 chloroform and centrifuged for 15 min at 13000 rpm, 4°C. The aqueous phase was recovered,  
588 mixed by inversion with 500 µl of isopropanol, incubated for 10 min at room temperature, and  
589 centrifuged for 10 min at 13000 rpm, 4°C. The pellet was washed with 1 ml Ethanol 70% and  
590 centrifuged for 5 min at 10000 rpm. The supernatant was discarded and the pellet dried for 5-10  
591 min at 37°C, resuspended with 50 µl nuclease-free water and incubated for 15 min at 56°C. Finally,  
592 samples were treated with DNase following the Thermo Scientific DNase1, RNase-free Protocol,  
593 and RNA were purified with the RNeasy Mini kit (QIAGEN) according to manufacturer  
594 instructions. Final RNA concentrations were quantified by Nanodrop.

### 595 **Lipocalin 2 (Lcn2) measurements in cecal and fecal contents**

596 Frozen cecal and fecal samples were used to quantify the presence of lipocalin-2 protein  
597 (LCN2) by enzyme linked immunosorbent assay (ELISA). Samples previously frozen (cecal, -  
598 80°C, and fecal, -20°C) were weighed in new tubes between 5-5 mg. Samples were kept over dry  
599 ice during the weighing. Samples were resuspended in 1 mL PBS (pH 7.4), vortexed for 30s, and  
600 kept at 4°C overnight to homogenize. Samples were then extensively vortexed to a homogeneous  
601 solution. To measure the LCN-2 levels, a DuoSet mouse lipocalin-2/NGAL ELISA kit (R&D  
602 Biosystems, USA) was employed using several dilutions of sample homogeneous solution.  
603 Quantification was done following manufacturer protocol.

### 604 **Soluble IgA measurements in cecal and fecal contents**

605 To measure soluble IgA levels, Nunc® MaxiSorp™ 384 well plates (Sigma-Aldrich) were  
606 coated overnight with 10 ng/well rabbit anti-mouse IgA (Novus Biologicals, Bio-Techne NB7506)  
607 in 20 µl/well of carbonate-bicarbonate buffer (Sigma, Ref.: C3041). After four washes with  
608 Washing Buffer (1% Tween-20, 154mM Sodium Chloride and 10mM Trisma-base), 75µl of  
609 Blocking Buffer (15 mM Trizma-Acetate, 136 mM Sodium Chloride, 2 mM Potassium Chloride  
610 and 1% (w/v) BSA (Bovine Serum Albumin)). After 2h at room temperature, wells were washed  
611 again. Sample homogeneous solution and standards (mouse IgA Isotype Control UNLB, Southern  
612 Biotech, Imtec Diagnostics, Ref: 0106-01) were diluted in Dilution Buffer (15 mM Trizma-  
613 Acetate, 136 mM Sodium Chloride, 2 mM Potassium Chloride, 0.1% (w/v) Tween-20, and 1%  
614 BSA) and incubated into the plate at 20 µl/well, room temperature for 90 min. After washing, 20  
615 µl/well of a Phosphatase Alkaline-conjugated goat anti-mouse IgA (Southern Biotech, Imtec  
616 diagnostics, Ref: 1040-04), diluted 1/1000 in Dilution Buffer, was added and incubated at room  
617 temperature for 90 min. After a final wash, 40 µl/well of substrate (1 phosphate tablet (Sigma, ref

618 S0642-200 TAB) dissolved in 10 mL Substrate Buffer (1 mM 2-Amino-2-methyle-1-propanole,  
619 0.1 mM MgCl<sub>2</sub>·6H<sub>2</sub>O)) was added. The plate was incubated at 37°C for 60 min before the  
620 absorbance was measured at 405 nm using an ELISA plate reader (SpectraMax Plus 384  
621 Microplate Reader from Molecular Devices; Software: SoftMax Pro 7 Software, Molecular  
622 Devices). The IgA concentration was determined for each sample using the formulated standard  
623 curve.

#### 624 **Short- and branched-chain fatty acid quantification**

625 Short-chain and branched-chain fatty acids (SCFAs) standards mixture was obtained from  
626 Sigma (CRM46975). <sup>13</sup>C-short chain fatty acid stool mixture (Sigma, SBR00035-1mL) was used  
627 as the internal standard (IS). Analytical reagent-grade 3-nitrophenylhydrazine (3NPH)·HCl  
628 (Cat#N21804), EDAC·HCl (Cat#341006); HPLC grade pyridine (Cat#270407); LC-MS  
629 grade acetonitrile (Cat#34851), water (Cat#270733), and formic acid (Cat#5438040450) were also  
630 purchased from Sigma-Aldrich. The working standard solutions were created by performing serial  
631 dilution from the 10mM stock solution down to nM range using freshly prepared 50% (v/v)  
632 aqueous acetonitrile in water. The chemical derivatization protocol was modified from Han et al.  
633 [47]. Briefly, 20μL of the working standard solutions or samples was mixed with 40μL of 200mM  
634 3NPH in 50% aqueous acetonitrile, 120mM EDAC-6% (v/v) pyridine solution in the same solvent  
635 and 4μL of the IS in a Verex glass vial. The mixture was reacted at 40°C for 30 min. After reaction,  
636 96μL of 0.1% formic acid in 10% acetonitrile solution was added to the mixture to quench the  
637 reaction. 30μL of the reaction solution was then transferred to a new HPLC vial and 2-μL aliquot  
638 of each solution was injected into the LC- MS/MS instrument. Each modified SCFA was optimized  
639 in Agilent MS for detection through Agilent Optimizer 2.0. All optimized SCFAs information was  
640 combined, and a LC-MRM MS method was created. Retention time for each SCFA was determined  
641 from two transitions. Then the MRM MS method was transformed into a dynamic MRM MS or  
642 dMRM MS method with all the RTs and MS information for the final LC-MS/MS acquisition method.

643 LC-MS/MS analysis was performed on the Agilent Technologies Triple Quad 6470  
644 LC/MS system consist of 1290 Infinity II LC Flexible Pump (Quaternary Pump), 1290 Infinity II  
645 Multisampler, 1290 Infinity II Multicolumn Thermostat with 6 port valve and 6470 triple quad  
646 mass spectrometer. Agilent Masshunter Workstation Software LC/MS Data Acquisition for 6400  
647 Series Triple Quadrupole MS with Version B.08.02 is used for calibration, compound optimization  
648 and sample data acquisition.



649 A Waters Acquity UPLC BEH TSS C18 column (2.1 x 100mm, 1.7 $\mu$ m) column was used  
650 with mobile phase A) consisting of 0.1% formic acid in water; mobile phase (B) consisting of  
651 0.1% formic acid in acetonitrile. Gradient program: mobile phase (B) was held at 15% for 1 min,  
652 increased to 55% in 19 min, then to 99% in 20 min and held for 2 min before going to initial  
653 condition and held for 4 min. The column was at 40 °C and 2  $\mu$ l of sample was injected into the  
654 LC-MS with a flow rate of 0.3 ml/min. Calibration of the 6470 MS was achieved through Agilent  
655 ESI-Low Concentration Tuning Mix. Source parameters: Gas temp 300 °C, Gas flow 5 l/min,  
656 Nebulizer 45 psi, Sheath gas temp 250 °C, Sheath gas flow 11 l/min, Capillary -3500 V, Delta EMV  
657 -200 V. Dynamic MRM scan type is used with 0.07 min peak width. dMRM transitions and other  
658 parameters for each compound were list in a separate sheet. Delta retention time of plus and minus  
659 1 min, fragmentor of 40 eV and cell accelerator of 5 eV were incorporated in the method. Data  
660 analysis was performed by Agilent Mass Hunter Quantitative Analysis for QQQ B.10.00 for  
661 integration. Results were exported to CVS file for further analysis.

#### 662 **Lamina propria cell extraction and flow cytometry analysis**

663 Cecal and colonic lamina propria cells were extracted using the Lamina Propria  
664 Dissociation Kit and gentleMACS Dissociators (Miltenyi Biotec, Germany) according to the  
665 manufacturer's instruction. After digestion, cells were resuspended in PB buffer (PBS, pH 7.2, 0.5  
666 % BSA) and counted. For analysis of T cells and NK cells with the expression of transcription  
667 factors, the FOXP3/Transcription Factor Staining Buffer kit (eBiosciences – 00-5523-00) was used  
668 along with the following anti-mouse antibodies: BV605-conjugated anti-CD4 (Biolegend, RM4-  
669 5; 1/700), BV650-conjugated anti-B220 (BD Biosciences, RA3-6B2; 1/88), BV711-conjugated  
670 anti-CD3 (Biolegend, 17A2; 1/88), BV780-conjugated anti-CD45 (BD Biosciences, 30-F11;  
671 1/88), FITC-conjugated anti-CD335/NKp46 (Biolegend, 29A1.4; 1/100), PE-Cy5-conjugated  
672 anti-CD8 (Biolegend, 53-6.7; 1/700), eF450-conjugated anti-FoxP3 (eBiosciences, FJK-16s;  
673 1/200), PE-conjugated anti-GATA3 (Biolegend, 16E10A23; 1/44), PE-eF610-conjugated anti-  
674 EOMES (eBiosciences, Dan11mag; 1/100), PE-Cy7 -conjugated anti-Tbet (Biolegend, 4B10;  
675 1/44), APC-conjugated anti-RORgt (eBiosciences, AFKJS-9; 1/22). For B cells analysis and  
676 immunoglobulin expression, the BD Cytotfix/Cytoperm<sup>TM</sup> Fixation/Permeabilization Solution Kit  
677 (BD Biosciences – 554714) was used along with the following anti-mouse antibodies: eF450-  
678 conjugated anti-B220/CD45R (eBiosciences, RA3-6B2; 1/700), eF506-conjugated anti-CD19  
679 (eBiosciences, 1D3; 1/88), BV711-conjugated anti-CD3 (Biolegend, 17A2; 1/88), BV780-



680 conjugated anti-CD45 (BD Biosciences, 30-F11; 1/88), APC-conjugated anti-CD138 (Biolegend,  
681 281-2; 1/100), FITC-conjugated anti-IgA (eBiosciences, mA-6E1; 1/700), PerCP-Cy5.5-  
682 conjugated anti-IgD (Biolegend, 11-26c.2a; 1/200), PE-conjugated anti-IgE (Biolegend, RME-1;  
683 1/44), PE-Cy5-conjugated anti-IgM (BD Biosciences, R6-60.2; 1/100), PE-Cy7 -conjugated anti-  
684 IgG (Biolegend, Poly4053; 1/44). Briefly, 1.5 million cells were washed twice with PBS prior to  
685 15 min of staining with the Zombie NIR™ Fixable Viability dye (BioLegend – 423105), followed  
686 by 2 washes with FACS Buffer (PBS, 5% fetal bovine serum) and fixation according to  
687 manufacturer instructions. Cells were then incubated at 4°C for 15 min with Fc Block (Rat anti-  
688 mouse CD16 and CD32; BD Pharmingen – Cat.553141) and 30 min with the antibody mixes. Both  
689 Fc Block and antibodies were diluted in the permeabilization buffer provided with the fixation  
690 kits. Finally, cells were washed twice in their respective permeabilization buffer and resuspended  
691 in FACS Buffer for acquisition on a NovoCyte Quanteon Flow Cytometer System (Agilent). The  
692 data were then analyzed on FlowJo.

### 693 **Analysis of IgA-coating of bacteria and sorting**

694 Frozen fecal samples were homogenized in 1 ml ice-cold PBS and centrifuged for 3 min  
695 at 100g, 4°C. Supernatant was filtered through a 70 µm straining sieve and centrifuged for 5 min  
696 at 10,000g, 4 °C. The pellet was resuspended in 1 ml ice-cold PBS, the OD<sub>600</sub> detected on a  
697 Nanodrop and the amount of bacteria computed as follow: 2 OD<sub>600</sub> = 10<sup>9</sup> bacteria. Bacteria were  
698 pelleted again for 5 min at 10,000g, 4 °C, and resuspended in 500 µl of staining buffer (PBS, 5%  
699 goat serum). After 20 min of incubation on ice, 1x10<sup>9</sup> bacteria were washed with 1 ml ice-cold  
700 PBS and stained for 30 min at 4°C with 4 µg of FITC-conjugated anti-mouse IgA antibody  
701 (Southern Biotech) in 100 µl of staining buffer. Cells were then washed once and resuspended in 1  
702 ml PBS, and 100 µl of bacteria was pelleted and frozen until further analysis. Remaining bacteria  
703 were centrifuged and resuspended in 90 µl of staining buffer and 10 µL of anti-FITC MicroBeads.  
704 After 15 minutes of incubation at 4°C, bacteria were washed, resuspended in 500 µl of staining  
705 buffer and applied onto a LS column for sorting of IgA<sup>+</sup> and IgA<sup>-</sup> fractions with a QuadroMACS™  
706 Separator (Miltenyi Biotec). IgA-coated and IgA-uncoated fractions were centrifuged and dry  
707 pellets were stored at -80°C until further analysis. For analysis of IgA coating of bacteria, frozen  
708 pellets were defrost on ice and washed with 1 ml of staining buffer. Since all samples were not  
709 sorted at the same time, bacteria were stained again for 30 min with 0.5 µg of FITC-conjugated  
710 anti-mouse IgA antibody (Southern Biotech) in 100 µl of staining buffer to refresh and harmonize

711 the staining between batches. After a washing step, DNA was stained for 20 minutes with diluted  
712 1:4000 in 200  $\mu$ l of DNA staining solution (0.1 M HEPES, 0.9 % NaCl, pH 7.2). Finally, bacteria  
713 were washed twice with PBS, fixed for 20 min in 4% PFA, washed again and analyzed on a  
714 NovoCyte Quanteon Flow Cytometer System (Agilent). Data were then analyzed on FlowJo. For  
715 analysis of IgA affinity, bacteria were treated with 200  $\mu$ l of PBS containing 3M NaSCN for 15  
716 min at 4°C, 800rpm, prior to blocking and staining with FITC-conjugated anti-mouse IgA antibody  
717 as mentioned above.

## 718 **Mucus measurements**

719 The colons were sectioned from the colon-cecum junction to the anus, and immediately  
720 fixed in freshly made Carnoy's fixative (methanol:chloroform:glacial acetic acid, 60:30:10 v/v).  
721 The distal part of the small intestine was fixed in freshly made Carnoy's fixative together with the  
722 half blunt end of the cecum. Fixed tissues were kept in Carnoy's fixative for three hours and  
723 exchanged for fresh fixative for another 24 hours. The tissues were then washed in 100% methanol  
724 and kept until placed in cassettes for histology preparation. The remaining empty half of the cecum  
725 were flash frozen in liquid nitrogen and kept at -80°C until further use.

726 Slides were deparaffinized by submerging in xylene (Sigma-Aldrich, USA) for five  
727 minutes, followed by another xylene incubation for five minutes. Afterward, the slides were  
728 dehydrated twice in 100% ethanol for 5 minutes. The slides were then quickly washed in Milli-Q  
729 water and antigens were retrieved by submerging in antigen retrieving solution (10 mM sodium  
730 citrate, pH 6.0). The submerged sections were heated to 90°C for 10 minutes and cooldown in  
731 room temperature for 20 minutes. Slides were quickly dipped three times in Milli-Q water and  
732 blotted to remove excess liquid. To better hold liquid, a PAP pen was used to draw around the  
733 tissue area for the subsequent steps. The sections were blocked by covering the tissue in blocking  
734 buffer (1:10 goat serum (Sigma, USA) in Tris-buffered Saline (TBS; 500 mM NaCl, 50 mM Tris,  
735 pH 7.4)) and incubated for an hour at room temperature. For the primary antibody staining, the  
736 tissue was covered with a 1:200 dilution of Mucin 2 antibody (H-300) (Santa Cruz Biotechnology,  
737 USA) in blocking buffer and incubated for two hours at room temperature. Following the  
738 incubation, the slides were rinsed three times in TBS, for five minutes each. The secondary  
739 antibody staining was performed by covering the tissue with a 1:200 dilution of Alexa Fluor 488  
740 conjugated goat anti-rabbit IgG antibody (Thermo Fisher Scientific, USA) in blocking buffer for  
741 one hour at room temperature in dark. The tissue sections were washed twice in TBS for 5 minutes,

742 gently blotted, and covered with ProLong Gold Antifade reagent with DAPI (Invitrogen, USA),  
743 covered with cover slips and sealed with nail polish. The slides were kept at room temperature for  
744 24 hours in dark, then kept in 4°C until imaging. The mucus layer in the sections were visualized  
745 using a Zeiss Apotome by taking pictures across fecal pellets and stitching the images together to  
746 compose a single image. Mucus layer measurements were performed by using BacSpace as  
747 described by Earle et al.

## 748 **Histological examination of intestinal tissue sections**

749 Extent of histologic lesions was scored on a semi-quantitative basis by a trained  
750 pathologist (KE) in a blinded fashion, using a modification of the scoring system of Bugni *et al.*  
751 [48]. Inflammation, epithelial damage, epithelial hyperplasia and dysplasia and the presence or  
752 absence of submucosa edema were scored on a scale of 1-4 according to the following table.  
753 Scores for each category were added to determine a total score. Cecum and colon were scored  
754 separately.

| Score                        | 0      | 1                                                                                                       | 2                                                                                                    | 3                                  | 4                                      |
|------------------------------|--------|---------------------------------------------------------------------------------------------------------|------------------------------------------------------------------------------------------------------|------------------------------------|----------------------------------------|
| <b>inflammation</b>          | Normal | Scattered PMNs or plasma cells in lamina propria or submucosa                                           | Coalescing mucosal and/or submucosal inflammation                                                    | Widespread submucosal inflammation | Severe diffuse transmural inflammation |
| <b>epithelial damage</b>     | None   | Focally dilated glands and/or attenuated surface epithelium, and/or clusters of sloughed cells in lumen | Focally extensive gland dilation and/or surface epithelial attenuation, many sloughed cells in lumen | Mucosa erosions                    | Mucosal ulceration                     |
| <b>hyperplasia/dysplasia</b> | Normal | Hypertrophy and/or hyperplasia present                                                                  | Cellular and/or glandular dysplasia present                                                          |                                    |                                        |
| <b>Submucosal edema</b>      | Absent | Present                                                                                                 |                                                                                                      |                                    |                                        |

755

## 756 **Mucus penetrability assay**

757 Penetrability of the colonic mucus was assessed as described by Gustafsson et al [21].  
758 Briefly, colons were flushed with ice-cold oxygenated KREBS Buffer (116 mM NaCl, 1.3 mM  
759 CaCl<sub>2</sub>, 3.6 mM KCl, 1.4 mM KH<sub>2</sub>PO<sub>4</sub>, 23 mM NaHCO<sub>3</sub>, and 1.2 MgSO<sub>4</sub> – Carl Roth) and opened

760 along the mesenteric axis. The longitudinal muscle layer was removed by blunt dissection and the  
761 distal mucosa was inserted in a perfusion chamber. The basolateral chamber was filled with 0.6  
762  $\mu\text{g/ml}$  SYTO9 (Fisher Scientific - 10237582) in oxygenated KREBS Glucose Buffer (KREBS  
763 Buffer containing 10mM Glucose, 5.7 mM sodium pyruvate and 5.1 mM sodium-l-glutamate),  
764 and the apical chamber was filled with oxygenated KREBS Mannitol Buffer (KREBS Buffer,  
765 containing 10mM Mannitol, 5.7 mM sodium pyruvate and 5.1 mM sodium-l-glutamate). After 10  
766 min incubation in the dark at room temperature, FluoSphere™ carboxylate beads (1 $\mu\text{m}$ , red  
767 580/605 – Invitrogen – F882) were applied on top and let to sediment on the tissue for 5 min in  
768 the dark at room temperature. The apical chamber was then gently washed several times to remove  
769 excess of beads. The chamber was incubated for 10 min in the dark before being visualized with a  
770 microscope. For each tissue, 4-7 confocal images were taken in XY stacks from the epithelium at  
771 the bottom to the beads on top, with 5  $\mu\text{m}$ -intervals between sections. Images were then analyzed  
772 with Imaris software, and the penetrability was computed by comparing the distance between the  
773 outer border of the beads and the epithelium with the distance between the most inner beads and  
774 the epithelium.

### 775 **16S rRNA gene-based community analysis**

776 PCR and library preparation were performed by the University of Michigan Microbiome  
777 Core lab as described by Kozich et al. [49]. The V4 region of the 16S rRNA gene was amplified  
778 using the dual-index primers described by Kozich et al, 2013. The normalized and amplicon size  
779 evaluated samples were sequenced using an Illumina MiSeq. The raw sequences were analyzed  
780 using mothur v1.42.3 [50] with the included controls: PBS control during the sequencing and  
781 ZymoBIOMICS Microbial Community DNA Standard (cat# D6306) for error analysis. Sequences  
782 were aligned to the reference Silva database version 132 for contamination analysis and SPF  
783 experiments. Moreover, gnotobiotic mice sequences were also aligned to a custom reference  
784 database containing the 16S v4 region from each of the 14 bacteria members. The R package  
785 “vegan” was used to calculate the principal component analysis from the Bray-Curtis dissimilarity  
786 index.

### 787 **Acknowledgements**

789 We thank the University of Michigan Germfree Core and Microbiome Core for expert  
790 technical assistance, Drs. Gunnar Hansson and George Birchenough (University of Gothenburg)

791 for training on the mucus bead permeability assay, Dr. Leonard Augenlicht (Albert Einstein  
792 University) for providing *Muc2*<sup>-/-</sup> mice and Bill Kruger (J. Rettemaier, USA) for kindly providing  
793 fiber samples and discussions regarding their composition and formulation. We are extremely  
794 grateful for support from the Kenneth Rainin Foundation (Innovator Award to ECM) and the US  
795 National Institutes of Health (R01s DK118024, DK125445 to ECM and P01 HL149633, which  
796 provides funding to CAL, TMS and ECM). We thank the Luxembourg National Research Fund  
797 (FNR) for CORE grants to MSD. (C15/BM/10318186 and C18/BM/12585940). GVP was  
798 supported by funds from the W. Garfield Weston Foundation. MB was supported by a European  
799 Commission Horizon 2020 Marie Skłodowska-Curie Actions individual fellowship (897408). MW  
800 was supported by a Fulbright grant for Visiting Scholars from the Commission for Educational  
801 Exchange between the United States of America, Belgium and Luxembourg. ETG was supported  
802 by FNR PRIDE (17/11823097) and the Fondation du Pélican de Mie et Pierre Hippert-Faber, under  
803 the aegis of the Fondation de Luxembourg.

804

#### 805 **Competing interest statement**

806 ECM works as a consultant and an advisory board member at Novome Biosciences and January,  
807 Inc, United States. MSD works as a consultant and an advisory board member at Theralution  
808 GmbH, Germany.

809

#### 810 **Figure Legends**

811 (For convenience, each legend is also provided immediately after the corresponding figure)

812

813 **Figure 1. Low fiber and microbiome driven disease development in *Il10*<sup>-/-</sup> mice. A.** Weight  
814 trajectories of adult C57BL/6J *Il10*<sup>-/-</sup> mice colonized with the human synthetic microbiota  
815 containing 14 species (SM14) and maintained on a fiber rich (FR) diet or switched to a fiber free  
816 (FF) diet after 14 d of colonization. Curves represent polynomial (quadratic) equations fit to all of  
817 the weights gathered at various days for the two treatments. Weights were measured more  
818 frequently after day 40 due to the declining health of the FF group and animals that were  
819 euthanized were excluded from the curve at later points. Two FF-fed animals from an early  
820 experiment were found dead on arrival and could not be included in subsequent analyses. All others  
821 were euthanized if they reached less than 80% starting weight and counted as lethality. The right

822 axis shows survival in each group over time. The number of mice in each group, along with sexes  
823 are indicated in the figure legend. **B.** Representative cecal histology of FF (top) and FR (bottom)  
824 fed colonized *III0*<sup>-/-</sup> mice. In the top panel, block arrow points to a particularly large ulcer and the  
825 line arrow to an area of edema. Scale bars, 250  $\mu$ m. **C.** Quantitative, blinded histological scoring  
826 of ileal, cecal, and colonic tissue taken from colonized *III0*<sup>-/-</sup> mice fed the FF diet. Bold horizontal  
827 bar represents the mean and lighter error bars the S.E.M. (n=15–20, one-way ANOVA and post  
828 hoc test with Holm-Šídák's multiple comparison test) **D.** Quantitative, blinded histological scoring  
829 of cecal tissue taken from colonized *III0*<sup>-/-</sup> mice fed the FR and FF diets, along with additional  
830 treatments discussed in the text to manipulate individual diet (FR/FF), colonization (SM14 or  
831 germfree, latter indicated by dashed lines) and host genotype (wild-type, WT, or *III0*<sup>-/-</sup>) variables.  
832 Here, and in subsequent panels, the red box highlights the condition with most severe  
833 inflammation. Bold horizontal bar represents the mean and lighter error bars the S.E.M. (n=5–20,  
834 two-way ANOVA and post hoc test with Original FDR method of Benjamini and Hochberg) **E.**  
835 Cecal lipocalin (*Lcn2*) measurements in the ceca of animal treatments shown in D. Bold horizontal  
836 bar represents the mean and lighter error bars the S.E.M. (n=5–23, two-way ANOVA and post hoc  
837 test with Original FDR method of Benjamini and Hochberg) **F.** Mucus penetrability by 1  $\mu$ m-sized  
838 beads in the distal colon of *III0*<sup>-/-</sup> and WT mice fed the FR and FF diets. **G.** Distance of 1  $\mu$ m-sized  
839 beads from the epithelium in the same mice as in F. **H.** Weight trajectories of *III0*<sup>-/-</sup> mice born to  
840 either SM14 or specific pathogen free (SPF) parents and weaned to FR or FF. By 79d post weaning  
841 (100d after birth), only the SM14, FF group displays weight loss. Curves represent polynomial  
842 (quadratic) equations fit to all of the weights gathered at various days for the two treatments. **I.**  
843 Survival curves for 4 separate groups of WT C57bl/6 or *III0*<sup>-/-</sup> mice colonized by parental transfer  
844 of SM14 bacteria at birth. All groups show 100% survival until 129d post weaning (150d total),  
845 except for FF fed mice which experience 100% lethality by 105d. **J.** Fecal *Lcn2* measurements  
846 over time in SM14 colonized *III0*<sup>-/-</sup> pups weaned to FR and FF. FF mice experience progressively  
847 increasing levels that are reciprocal with the weight trajectory shown in H. Middle horizontal bars  
848 represent the mean and flanking error bars the S.E.M. **K.** Endpoint cecal *Lcn2* levels in SM14 and  
849 SPF colonized mice. Bold horizontal bar represents the mean and lighter error bars the S.E.M.  
850 (n=4–7, two-way ANOVA and post hoc test with Original FDR method of Benjamini and  
851 Hochberg) **L.** Mucus thickness measurements in SM14 and SPF colonized mice. Bars represent  
852 the mean and error bars the S.E.M. Sample size is indicated below each treatment group. (n=4–5,  
853 two-way ANOVA and post hoc test with Original FDR method of Benjamini and Hochberg) **M.**



854 Cecal Lcn2 measurements in mice fed versions of the FF diet with glucose replaced by dietary  
855 fiber from apple, wheat, oat or soluble starch. Concentrations of each addition are noted below the  
856 ingredient. Bold horizontal bar represents the mean and lighter error bars the S.E.M. (n=5–23, two-  
857 way ANOVA and post hoc test with Original FDR method of Benjamini and Hochberg) **N.** Fecal  
858 Lcn2 measurements over time in SM14 colonized adult mice, which were shifted to FF at 14d post  
859 colonization and then shifted back to FR at either 30d or 40d. For each time point and treatment  
860 the mean is shown along with individual points and error bars represent S.E.M. **O.** Endpoint  
861 histological evaluation of the cecal tissue from mice shown in N. compared to mice maintained on  
862 FR or FF. (n=5–20, two-way ANOVA and post hoc test with Original FDR method of Benjamini  
863 and Hochberg) The experiments for data in panels F. and G. were done at the University of  
864 Luxembourg animal facility. All other experiments were done at the University of Michigan  
865 animal facility. P values: \*  $\leq 0.05$ ; \*\*  $\leq 0.01$ ; \*\*\*  $\leq 0.001$ ; \*\*\*\*  $\leq 0.001$ ; \*\*\*\*\*  $\leq 0.0001$ ; ns = not  
866 significant.

867

868 **Figure 2. Mucus integrity is central to diet-induced inflammation development.** **A.** Cecal  
869 lipocalin (Lcn2) measurements in *Il10<sup>-/-</sup>* mice with full or reduced complexity synthetic microbiota  
870 as indicated in the “Colonized” line below each graph: Full 14 species SM (“14”), just the 10  
871 species that do not degrade mucin *O*-glycans *in vitro* (“10”), or 10 non mucin-degrading species  
872 plus individual mucin degraders, *B. thetaiotaomicron* (*Bt*), *B. caccae* (*Bc*), *B. intestinhominis* (*Bi*)  
873 or *A. muciniphila* (*Am*). Bold horizontal bar represents the mean and lighter error bars the S.E.M.  
874 (n=7–23, two-way ANOVA and post hoc test with Original FDR method of Benjamini and  
875 Hochberg) **B.** Cecal histology scores of the same treatment group shown in A. (n=5–20, two-way  
876 ANOVA and post hoc test with Original FDR method of Benjamini and Hochberg) **C.** Mucus  
877 thickness measurements of SM10 colonized mice fed the FF diet (gray) compared to SM14  
878 colonized mice fed either diet. (n=5, two-way ANOVA and post hoc test with Original FDR  
879 method of Benjamini and Hochberg) **D.** Survival curves of *Il10<sup>-/-</sup>* adult mice colonized with SM14  
880 and SM10 to a maximum of 150d. **E.** Representative histology images of SM10, SM10+*Bt* and  
881 SM10+*Am*. **F.** Survival curves of *Il10<sup>-/-</sup>* and DKO adult mice colonized with the SM14. **G.-J.**  
882 Individual endpoint weight loss (G.), Cecal Lcn2 (H.), colon histology (I.) and cecal histology (J.)  
883 for SM14-colonized *Il10<sup>-/-</sup>Muc2<sup>-/-</sup>* double knockout (DKO) mice fed the FR or FF diets. In all three  
884 panels the mean is shown and error bars represent the S.E.M. (n=5-23, two-way ANOVA and post



885 hoc test with Original FDR method of Benjamini and Hochberg) **K.** Comparison of colon histology  
886 in *Il10*<sup>-/-</sup> (top) and DKO (bottom) mice showing worse disease in DKO mice.

887  
888

889 **Figure 3. Mucolytic bacteria influence the inflammatory pathways of colitis.** **A.** Lipocalin-2  
890 levels in the cecal contents and feces of GF and colonized *Il10*<sup>-/-</sup> mice (n=4–7, two-way ANOVA  
891 and post hoc test with Original FDR method of Benjamini and Hochberg). **B.** Proportion of NK  
892 cells among CD3<sup>-</sup>CD45<sup>+</sup> cells in the cecum and colon lamina propria of SM10- and SM14-  
893 colonized *Il10*<sup>-/-</sup> mice (n=4–11, two-way ANOVA and post hoc test with Original FDR method of  
894 Benjamini and Hochberg). **C.** Proportion of CD3<sup>+</sup>CD4<sup>+</sup> cells among CD45<sup>+</sup> cells in the cecum and  
895 colon of SM10- and SM14-colonized *Il10*<sup>-/-</sup> mice (n=4–11, two-way ANOVA and post hoc test  
896 with Original FDR method of Benjamini and Hochberg). **D.** Proportion of CD3<sup>+</sup>CD8<sup>+</sup> cells among  
897 CD45<sup>+</sup> cells in the cecum and colon of SM10- and SM14-colonized *Il10*<sup>-/-</sup> mice (n=4–11, two-way  
898 ANOVA and post hoc test with Original FDR method of Benjamini and Hochberg). **E.-F.**  
899 Proportion of helper T (Th) cell subsets (defined as CD3<sup>+</sup> CD4<sup>+</sup> Foxp3<sup>-</sup>) among CD45<sup>+</sup> cells in the  
900 (E) cecum and (F) colon of SM10- and SM14-colonized *Il10*<sup>-/-</sup> mice (n=4–11, two-way ANOVA  
901 and post hoc test with Original FDR method of Benjamini and Hochberg). **G.** Cytokine mRNA  
902 levels in the Mesenteric Lymph Nodes (MLN) of *Il10*<sup>-/-</sup> mice (n=4–11, two-way ANOVA and post  
903 hoc test with Original FDR method of Benjamini and Hochberg). **H.** Proportion of regulatory T  
904 cell subsets among CD45<sup>+</sup> cells in the colon of SM10- and SM14-colonized *Il10*<sup>-/-</sup> mice (n=4–11,  
905 two-way ANOVA and post hoc test with Original FDR method of Benjamini and Hochberg). Data  
906 are represented as mean ± SD. \*p < 0.05; \*\*p < 0.01; \*\*\*p < 0.001; \*\*\*\*p < 0.0001.

907  
908

909 **Figure 4. Fiber deprivation alters IgA–bacteria interactions in a microbial species-specific**  
910 **manner.** **A.** Concentration of free IgA in the cecal content and feces of GF and colonized *Il10*<sup>-/-</sup>  
911 mice (n=4–9, two-way ANOVA and post hoc test with the two-stage linear step-up procedure of  
912 Benjamini, Krieger and Yekutieli). **B.** Proportion of IgA-producing cells among CD3<sup>-</sup>CD45<sup>+</sup> cells  
913 in the cecum (left) and colon (right) of GF SM10- and SM14-colonized *Il10*<sup>-/-</sup> and WT mice (n=4–  
914 11, two-way ANOVA and post hoc test with the two-stage linear step-up procedure of Benjamini,  
915 Krieger and Yekutieli). **C.** IgA-coating profiles of fecal bacteria from SM14-colonized mice fed a  
916 FR (top) or a FF (bottom) diet for 56 days showing the gating strategy of population being low-  
917 coated (IgA<sup>low</sup>) and high-coated (IgA<sup>high</sup>). Total IgA coating showed in panels **D.–E.** consist of the

918 addition of IgA<sup>high</sup> and IgA<sup>low</sup> coating. (D) Percentages of total (left), IgA<sup>high</sup> (middle) and IgA<sup>low</sup>  
919 (right) -coated bacteria as shown in (C) in the feces of FR- and FF-fed, SM14-colonized mice at  
920 21, 56 and 79 dpw (n=5–13, two-way ANOVA and post hoc test with the two-stage linear step-up  
921 procedure of Benjamini, Krieger and Yekutieli). (E) Percentages of total (left), IgA<sup>high</sup> (middle)  
922 and IgA<sup>low</sup> (right) -coated bacteria as shown in (C) in the feces of SM10-, SM14- or SPF-colonized  
923 *I110*<sup>-/-</sup> mice and SM14-colonized WT mice fed the FR or the FF diet for 79 days (n=5–8, two-way  
924 ANOVA and post hoc test with the two-stage linear step-up procedure of Benjamini, Krieger and  
925 Yekutieli). F. IgA-coating index (Kau index) of fecal bacteria from SM14-colonized *I110*<sup>-/-</sup> and  
926 WT mice (n=2–5, multiple unpaired t-test and post hoc test with the two-stage linear step-up  
927 procedure of Benjamini, Krieger and Yekutieli). Data are represented as mean ± SD. \*p < 0.05;  
928 \*\*p < 0.01; \*\*\*p < 0.001; \*\*\*\*p < 0.0001.

929  
930 **Figure 5. Co-housing SPF mice with SM14 colonized mice after weaning worsens disease. A.**  
931 Cecal lipocalin (Lcn2) levels in co-housed or non-co-housed SPF and SM14 mice (co-housing  
932 status is indicated at the bottom of this and subsequent panels as appropriate). (n=5-11, one-sample  
933 Student's t-test and Wilcoxon test) **B.** Cecal histology of the same treatments shown in A. (n=5-  
934 11, one-sample Student's t-test and Wilcoxon test) **C.** Cecal Lcn2 over time in co-housed and non-  
935 co-housed SPF and SM14 mice showing inflammatory response starting between 60–80d. Note  
936 the difference in the group born SPF when co-housed or not and shown in solid or dashed purple  
937 lines. **D.** Correlation of cecal Lcn2 and cecum histology scores of co-housed SM14/SPF fed FF  
938 diet showing similarity between these two measurements in individuals. **E.–G.** Relative abundance  
939 of SM14 species invading SPF co-housed mice, *E. coli*, *A. muciniphila*, *B. intestinhominis*,  
940 respectively. Data are represented as mean ± SEM. \*p < 0.05; \*\*p < 0.01; \*\*\*p < 0.001; \*\*\*\*p <  
941 0.0001.

942  
943 **Figure 6. A fiber free exclusive enteral nutrition (EEN) diet improves inflammation in part**  
944 **through isobutyrate production. A.** Weight trajectories of mice weaned onto FR, FF, and EEN  
945 diets. **B.** Cecal lipocalin levels of mice weaned onto FF, FR, and EEN diets. (n=7-15, two-way  
946 ANOVA and post hoc test with Original FDR method of Benjamini and Hochberg) **C.** Cecal  
947 histology scores of the same mice shown in B. (n=7-15, two-way ANOVA and post hoc test with  
948 Original FDR method of Benjamini and Hochberg) **D.** Mucus thickness measurements in mice  
949 shown in B. and C. revealing that the EEN diet does promote mucus thinning despite dampening

950 disease in some individuals. (n=5, two-way ANOVA and post hoc test with Original FDR method  
951 of Benjamini and Hochberg) **E.** Short-chain and branched-chain fatty acid measurements in mice  
952 fed FF, FR, or EEN diets. (n=5-15, two-way ANOVA and post hoc test with Original FDR method  
953 of Benjamini and Hochberg) **F.** Correlation between isobutyrate production and Lcn2 levels. **G.**  
954 Weight trajectories of mice fed the FF diet and water supplemented with either 35mM isobutyrate  
955 (orange) or butyrate (purple). (n=6-15, two-way ANOVA and post hoc test with Original FDR  
956 method of Benjamini and Hochberg) **H.** Cecal Lcn2 levels in the mice from panel G. **I.** Cecal  
957 histology scores of the mice shown in G. (n=6-15, two-way ANOVA and post hoc test with  
958 Original FDR method of Benjamini and Hochberg) **J.** SM14 community composition in mice fed  
959 the FR, FF and EEN diets. Note the similarity of preweaned mice to adults fed FF and the 250-  
960 fold increase in *E. rectale* after feeding the EEN diet. **K.** Short and branched chain fatty acid  
961 measurements in culture supernatants of individual SM14 bacteria. **L.** Short and branched chain  
962 fatty acid measurements in EEN fed mice colonized with either the full SM14 (closed symbols) or  
963 an SM13 that lacks *E. rectale*. (n=6-15, one-sample Student's t-test and Wilcoxon test) **M.**  
964 Survival of SM14 and SM13 (minus *E. rectale*) colonized mice on the FF and EEN diets. **N.** cecal  
965 Lcn2 measurements of the mice shown in M. (n=6-15, one-sample Student's t-test and Wilcoxon  
966 test) Data are represented as mean  $\pm$  SEM. \*p < 0.05; \*\*p < 0.01; \*\*\*p < 0.001; \*\*\*\*p < 0.0001.

967

## 968 **Extended Data Figure Legends**

969

970 **Extended Data Figure 1. Low fiber and microbiome driven disease development in *Il10<sup>-/-</sup>***  
971 **mice. A.-C.** Representative histology from wild-type (WT) SM14-colonized mice fed FR (A.),  
972 WT SM14-colonized mice fed FF (B.) or WT germfree mice fed FF (C.). All pictures are shown  
973 at 4x magnification, bars 500 $\mu$ M. **D.** Endpoint weights of the mice shown in Fig. 1A. Bold  
974 horizontal bar represents the mean and lighter error bars the S.E.M. (n=7-20, two-way ANOVA  
975 and post hoc test with Original FDR method of Benjamini and Hochberg) **E.-F.** Relative  
976 abundance streamplots of SM14 bacteria in *Il10<sup>-/-</sup>* (E.) or wild-type (F.) mice shifted to the FF diet  
977 at 14d after colonization. Dots below the graph indicate the time points at which feces was sampled  
978 and the black bar on the x-axis represents the period of FR feeding. **G.** Comparison of cecal *E. coli*  
979 and *B. thetaiotaomicron* populations in *Il10<sup>-/-</sup>* vs WT mice after 60d of colonization. Bold  
980 horizontal bar represents the mean and lighter error bars the S.E.M. (n=8-9, one-sample Student's

981 t-test and Wilcoxon test) **H.–I.** Representative staining and imaging for Muc2 (green) in colonic  
982 sections from FR (H.) or FF (I.) and counter-stained with DAPI (blue). These images were used  
983 for automated mucus measurement using BacSpace software [13] as described in methods. **J.**  
984 Automated mucus thickness measurements generated from colonic section images like those  
985 shown in H.–I. (n=5, one-sample Student's t-test and Wilcoxon test) Five mice were measured per  
986 treatment, with a total of 1–2 fecal mass sections imaged per mouse. **K.** Averaged Muc2 staining  
987 intensity measurements for the mice represented in H.–J. as a function of distance from the  
988 epithelium. **L.–M.** Representative visualization of 1  $\mu$ m-sized beads (in red) layered on the distal  
989 colon epithelium (in green) after feeding FR (L.) or FF (M.). The space between the beads and  
990 epithelial cells represents the penetrability of the mucus layer. **N.** Representative SM14  
991 composition in adult mice fed FR at 13d post gavage (p.g.) compared to still suckling pups at 14d  
992 post birth (p.b.) and 100d old SM14 colonized pups that were weaned onto either FR or FF diets.  
993 **O.** Survival plot of SM14 or SPF colonized pups weaned onto FR or FF diets and maintained for  
994 a total of 100d, the typical experimental duration. **P.** Cecal histology scores for SM14 or SPF  
995 colonized pups weaned onto FR or FF diets and maintained for a total of 100d. **P.** Cecal histology  
996 scores for SM14 or SPF colonized pups weaned onto FR or FF diets. Bold horizontal bar represents  
997 the mean and lighter error bars the S.E.M. (n=5–12, two-way ANOVA and post hoc test with  
998 Original FDR method of Benjamini and Hochberg).

999

1000 **Extended Data Figure 2. Fiber supplementation reduces inflammation severity.** **A.** Endpoint  
1001 weights of mice fed variations of the FF diet with glucose replaced by fiber from apple, oat or  
1002 wheat, or soluble starch. Fiber or starch were added at the concentrations listed below each  
1003 treatment and an equal amount of glucose was omitted. Bold horizontal bar represents the mean  
1004 and lighter error bars the S.E.M. (n=5–20, two-way ANOVA and post hoc test with Original FDR  
1005 method of Benjamini and Hochberg) **B.** Cecal histology scores of the treatment groups shown in  
1006 A. (n=5–20, two-way ANOVA and post hoc test with Original FDR method of Benjamini and  
1007 Hochberg) **C.–F.** Relative abundance streamplots of the SM14 bacteria in *Il10*<sup>-/-</sup> mice fed fiber-  
1008 enriched versions of the FF diet and containing either no added fiber (C.) or purified fiber from  
1009 apple (D.), oat (E.) or wheat (F.). Relative abundance values for *A. muciniphila*, *B. caccae* and *B.*  
1010 *ovatus* are shown next to each plot. **G.** Relative abundance comparison of all 4 mucin degraders  
1011 compared to the fiber-degrader *B. ovatus* in adult mice colonized with SM14 and fed FF or the  
1012 fiber supplemented diets. Note that the apple diet which had the lowest inflammation had the

1013 largest increase in *B. ovatus* and the largest decrease in mucin degrading bacteria. (n=5–8, two-  
1014 way ANOVA and post hoc test with Original FDR method of Benjamini and Hochberg) **H.** Weight  
1015 trajectories of the mice that were returned to the FR diet at either 30d or 40d.

1016

1017 **Extended Data Figure 3. Elimination of mucin-degrading bacteria reduces inflammation**  
1018 **development.** **A.** Representative mucus staining for SM10 colonized mice used to measure  
1019 thickness with Bacspace software.  $\alpha$ -Muc2: green, DAPI: blue, prediction of epithelium/mucus  
1020 interface: teal. **B.-G.** Relative abundance streamplots of the SM14 *Il10*<sup>-/-</sup> mice with all bacteria  
1021 present (B.), SM10 (C.), SM10 + *A. muciniphila* (D.), SM10 + *B. caccae* (E.), SM10 + *B.*  
1022 *thetaiotaomicron* (F.), SM10 + *B. intestinhominis* (G.). **H.** Endpoint weights of mice with reduced  
1023 presence of mucin-degrading species. **I.** Weight trajectories of SM14 colonized adult *Il10*<sup>-/-</sup> mice  
1024 reproduced in a separate mouse facility (University of Luxembourg, UoL). **J.** Weight trajectories  
1025 of SM14 and SM10 colonized *Il10*<sup>-/-</sup> mice born to colonized dams and reproduced in a separate  
1026 mouse facility (University of Luxembourg, UoL). **K.** Endpoint weight of individual animals shown  
1027 in J. **L.-Q.** Cytokine measurements by Luminex bead assay for wild-type and *Il10*<sup>-/-</sup> mice with  
1028 various colonization and diet treatment shown in main text Figure 1. **R.-Z.** Cytokine mRNA  
1029 expression in the cecum of *Il10*<sup>-/-</sup> pups fed FF or FR diets. (n=4-11, two-way ANOVA and post  
1030 hoc test with Original FDR method of Benjamini and Hochberg). Data are represented as mean  $\pm$   
1031 SD. \*p < 0.05; \*\*p < 0.01; \*\*\*p < 0.001; \*\*\*\*p < 0.0001.

1032

1033 **Extended Data Figure 4. Fiber deprivation does not cause colitis in the absence of genetic**  
1034 **predisposition and the microbiota.** **(A.–B.)** Proportion of immune cell populations in the cecum  
1035 and colon of: **A.** GF *Il10*<sup>-/-</sup> mice and **B.** SM14- or SM10-colonized WT mice (n=5–9, two-way  
1036 ANOVA and post hoc test with Original FDR method of Benjamini and Hochberg). Data are  
1037 represented as mean  $\pm$  SD and. For each cell population, data were analyzed along with data from  
1038 Fig. 3 and S5. \*p < 0.05; \*\*p < 0.01; \*\*\*p < 0.001; \*\*\*\*p < 0.0001.

1039

1040 **Extended Data Figure 5. Mucin-degrading bacteria promote Th1 immune responses in a**  
1041 **diet-dependent manner.** **A.** Gating Strategy for the analysis of T cells and NK cells in the cecal  
1042 and colonic lamina propria. **B.** Proportion of CD3<sup>+</sup> cells among CD45<sup>+</sup> cells in the cecum and  
1043 colon of SM10- and SM14-colonized *Il10*<sup>-/-</sup> mice (n=4–11, two-way ANOVA and post hoc test  
1044 with Original FDR method of Benjamini and Hochberg). **C.** Cytokine mRNA levels in the

1045 Mesenteric Lymph Nodes (MLN) of *Ill10*<sup>-/-</sup> mice (n=2–11, two-way ANOVA and post hoc test  
1046 with Original FDR method of Benjamini and Hochberg). **D.–E.** Proportion of cecal and colonic  
1047 regulatory T cells and (D.) and cecal regulatory T cell subsets (E.) among CD45<sup>+</sup> cells in SM10-  
1048 and SM14-colonized *Ill10*<sup>-/-</sup> mice (n=4–11, two-way ANOVA and post hoc test with original FDR  
1049 method of Benjamini and Hochberg). Data are represented as mean ± SD. \*p < 0.05; \*\*p < 0.01;  
1050 \*\*\*p < 0.001; \*\*\*\*p < 0.0001.

1051

1052 **Extended Data Figure 6. Fiber deprivation alters IgA–bacteria interactions. A.–B.** Proportion  
1053 of B cells (B220<sup>+</sup>), plasma cells (CD138<sup>+</sup>), IgD- and IgG-producing cells among CD3<sup>+</sup>CD45<sup>+</sup> cells  
1054 in the cecum (A.) and colon (B.) of GF, SM10- and SM14-colonized *Ill10*<sup>-/-</sup> and WT mice (n=4–  
1055 11, two-way ANOVA and post hoc test with Original FDR method of Benjamini and Hochberg).  
1056 **C.** Percentages of total (top), IgA<sup>high</sup> (middle) and IgA<sup>low</sup> (bottom) -coated bacteria as shown in  
1057 (C) in the feces of SM10-, SM14- or SPF-colonized *Ill10*<sup>-/-</sup> mice and SM14-colonized WT mice  
1058 fed the FR or the FF diet for 21 days (n=5–8, two-way ANOVA and post hoc test with the two-  
1059 stage linear step-up procedure of Benjamini, Krieger and Yekutieli). Data are represented as mean  
1060 ± SD. \*p < 0.05; \*\*p < 0.01; \*\*\*p < 0.001; \*\*\*\*p < 0.0001.

1061

1062 **Extended Data Figure 7. Effects of co-housing SM14 and SPF mice fed FR and FF diets. A.**  
1063 Weight trajectories of SM14 or SPF colonized mice that were co-housed at weaning (21d) with  
1064 pups harboring the opposite colonization (SM14 vs. SPF), noting the weight loss typically  
1065 observed in SM14/FF mice is eliminated. **B.–J.** 16S rRNA gene based measurements of the  
1066 remaining SM14 bacteria in co-housed mice: *R. intestinalis* (**B.**), *B. thetaiotaomicron* (**C.**), *B.*  
1067 *caccae* (**D.**), *C. aerofaciens* (**E.**), *B. uniformis* (**F.**), *M. formatexigens* (**G.**), *B. ovatus* (**H.**), *C.*  
1068 *symbiosum* (**I.**) and *D. piger* (**J.**). **K.** PCR analysis using *E. coli* HS specific primers [12] for the  
1069 presence of *E. coli* HS in mice that were mock gavaged weekly with PBS (left) or *E. coli* HS  
1070 (right). **L.** Cecal lipocalin measurements in SPF mice that were gavaged weekly with *E. coli* HS  
1071 and fed the FF diet. (n=6-7, one-sample Student's t-test and Wilcoxon test). **K.** PCR analysis of  
1072 endpoint fecal samples from mice gavaged with PBS or *E. coli* strain HS.

1073

1074 **Extended Data Figure 8.** Percentages of total (left), IgA<sup>high</sup> (middle) and IgA<sup>low</sup> (right) -coated  
1075 bacteria as shown in Fig. 4C in the feces of SM14-colonized *Ill10*<sup>-/-</sup> mice fed the FR, FF or EEN  
1076 diet for 21 or 79 days (n=3–5, two-way ANOVA and post hoc test with the two-stage linear step-

1077 up procedure of Benjamini, Krieger and Yekutieli). Data are represented as mean  $\pm$  SD. \*p <  
1078 0.05; \*\*p < 0.01; \*\*\*p < 0.001.



1079  
1080  
1081  
1082  
1083  
1084  
1085  
1086  
1087  
1088  
1089  
1090  
1091  
1092  
1093  
1094  
1095  
1096  
1097  
1098  
1099  
1100  
1101  
1102  
1103  
1104  
1105  
1106  
1107  
1108  
1109  
1110  
1111  
1112  
1113  
1114  
1115  
1116  
1117  
1118  
1119  
1120  
1121  
1122  
1123  
1124  
1125  
1126

## References

1. Shan, Y., M. Lee, and E.B. Chang, *The Gut Microbiome and Inflammatory Bowel Diseases*. Annu Rev Med, 2021. **73**:455-468
2. Mirkov, M.U., B. Verstockt, and I. Cleynen, *Genetics of inflammatory bowel disease: beyond NOD2*. Lancet Gastroenterol Hepatol, 2017. **2**:224-234.
3. Maloy, K.J. and F. Powrie, *Intestinal homeostasis and its breakdown in inflammatory bowel disease*. Nature, 2011. **474**:298-306.
4. Ng, S.C., et al., *Worldwide incidence and prevalence of inflammatory bowel disease in the 21st century: a systematic review of population-based studies*. Lancet, 2017. **390**: 2769-2778.
5. Agrawal, M., et al., *Viewpoint: Inflammatory Bowel Diseases Among Immigrants From Low- to High-Incidence Countries: Opportunities and Considerations*. J Crohns Colitis, 2020. **14**:267-273.
6. Liu, X., et al., *Dietary fiber intake reduces risk of inflammatory bowel disease: result from a meta-analysis*. Nutr Res, 2015. **35**:753-8.
7. Chassaing, B., et al., *Dietary emulsifiers impact the mouse gut microbiota promoting colitis and metabolic syndrome*. Nature, 2015. **519**:92-6.
8. Chassaing, B., et al., *Randomized Controlled-Feeding Study of Dietary Emulsifier Carboxymethylcellulose Reveals Detrimental Impacts on the Gut Microbiota and Metabolome*. Gastroenterology, 2022. **162**:743-756.
9. David, L.A., et al., *Diet rapidly and reproducibly alters the human gut microbiome*. Nature, 2014. **505**:559-63.
10. Porter, N.T. and E.C. Martens, *The Critical Roles of Polysaccharides in Gut Microbial Ecology and Physiology*. Annu Rev Microbiol, 2017. **71**:349-369.
11. Perler, B.K., E.S. Friedman, and G.D. Wu, *The Role of the Gut Microbiota in the Relationship Between Diet and Human Health*. Annu Rev Physiol, 2022. annurev-physiol-031522-092054 (online ahead of print).
12. Desai, M.S., et al., *A Dietary Fiber-Deprived Gut Microbiota Degrades the Colonic Mucus Barrier and Enhances Pathogen Susceptibility*. Cell, 2016. **167**:1339-1353 e21.
13. Earle, K.A., et al., *Quantitative Imaging of Gut Microbiota Spatial Organization*. Cell Host Microbe, 2015. **18**:478-88.
14. Schroeder, B.O., et al., *Bifidobacteria or Fiber Protects against Diet-Induced Microbiota-Mediated Colonic Mucus Deterioration*. Cell Host Microbe, 2018. **23**:27-40 e7.
15. Zhu, L., et al., *IL-10 and IL-10 Receptor Mutations in Very Early Onset Inflammatory Bowel Disease*. Gastroenterology Res, 2017. **10**:65-69.
16. Keubler, L.M., et al., *A Multihit Model: Colitis Lessons from the Interleukin-10-deficient Mouse*. Inflamm Bowel Dis, 2015. **21**:1967-75.
17. Sellon, R.K., et al., *Resident enteric bacteria are necessary for development of spontaneous colitis and immune system activation in interleukin-10-deficient mice*. Infect Immun, 1998. **66**:5224-31.
18. Morgan, X.C., et al., *Dysfunction of the intestinal microbiome in inflammatory bowel disease and treatment*. Genome Biol, 2012. **13**:R79.
19. Kitamoto, S., et al., *Dietary L-serine confers a competitive fitness advantage to Enterobacteriaceae in the inflamed gut*. Nat Microbiol, 2020. **5**:116-125.
20. Zhu, W., et al., *Xenosiderophore Utilization Promotes Bacteroides thetaiotaomicron Resilience during Colitis*. Cell Host Microbe, 2020. **27**:376-388 e8.

- 1127 21. Gustafsson, J.K., et al., *An ex vivo method for studying mucus formation, properties, and*  
1128 *thickness in human colonic biopsies and mouse small and large intestinal explants.* Am J  
1129 Physiol Gastrointest Liver Physiol, 2012. **302**:G430-8.
- 1130 22. Hooper, L.V. and A.J. Macpherson, *Immune adaptations that maintain homeostasis with*  
1131 *the intestinal microbiota.* Nature reviews. Immunology, 2010. **10**:159-69.
- 1132 23. Marcobal, A., et al., *Bacteroides in the Infant Gut Consume Milk Oligosaccharides via*  
1133 *Mucus-Utilization Pathways.* Cell host & microbe, 2011. **10**:507-14.
- 1134 24. Khan, S., et al., *Dietary simple sugars alter microbial ecology in the gut and promote*  
1135 *colitis in mice.* Sci Transl Med, 2020. **12**:eaay6218
- 1136 25. Martens, E.C., et al., *Recognition and Degradation of Plant Cell Wall Polysaccharides by*  
1137 *Two Human Gut Symbionts.* PLoS Biology, 2011. **9**: e1001221.
- 1138 26. Furter, M., et al., *Mucus Architecture and Near-Surface Swimming Affect Distinct*  
1139 *Salmonella Typhimurium Infection Patterns along the Murine Intestinal Tract.* Cell Rep,  
1140 2019. **27**:2665-2678 e3.
- 1141 27. Barros, L., C. Ferreira, and M. Veldhoen, *The fellowship of regulatory and tissue-*  
1142 *resident memory cells.* Mucosal Immunol, 2022. **15**:64-73.
- 1143 28. Yang, B.H., et al., *Foxp3(+) T cells expressing RORgammat represent a stable*  
1144 *regulatory T-cell effector lineage with enhanced suppressive capacity during intestinal*  
1145 *inflammation.* Mucosal Immunol, 2016. **9**:444-57.
- 1146 29. Wang, Y., M.A. Su, and Y.Y. Wan, *An essential role of the transcription factor GATA-3*  
1147 *for the function of regulatory T cells.* Immunity, 2011. **35**:337-48.
- 1148 30. Wohlfert, E.A., et al., *GATA3 controls Foxp3(+) regulatory T cell fate during*  
1149 *inflammation in mice.* J Clin Invest, 2011. **121**:4503-15.
- 1150 31. Palm, N.W., et al., *Immunoglobulin A coating identifies colitogenic bacteria in*  
1151 *inflammatory bowel disease.* Cell, 2014. **158**:1000-1010.
- 1152 32. Gomes-Santos, A.C., et al., *New insights into the immunological changes in IL-10-*  
1153 *deficient mice during the course of spontaneous inflammation in the gut mucosa.* Clin  
1154 Dev Immunol, 2012. **2012**:560817.
- 1155 33. Tan, J., et al., *Dietary Fiber and Bacterial SCFA Enhance Oral Tolerance and Protect*  
1156 *against Food Allergy through Diverse Cellular Pathways.* Cell Rep, 2016. **15**: 2809-24.
- 1157 34. Castro-Dopico, T., et al., *Anti-commensal IgG Drives Intestinal Inflammation and Type*  
1158 *17 Immunity in Ulcerative Colitis.* Immunity, 2019. **50**:1099-1114 e10.
- 1159 35. Logan, M., et al., *Analysis of 61 exclusive enteral nutrition formulas used in the*  
1160 *management of active Crohn's disease-new insights into dietary disease triggers.* Aliment  
1161 Pharmacol Ther, 2020. **51**:935-947.
- 1162 36. Day, A.S. and R.N. Lopez, *Exclusive enteral nutrition in children with Crohn's disease.*  
1163 World J Gastroenterol, 2015. **21**:6809-16.
- 1164 37. Guo, C.J., et al., *Depletion of microbiome-derived molecules in the host using*  
1165 *Clostridium genetics.* Science, 2019. **366**: eaav1282.
- 1166 38. Gorissen, S.H.M., et al., *Protein content and amino acid composition of commercially*  
1167 *available plant-based protein isolates.* Amino Acids, 2018. **50**:1685-1695.
- 1168 39. Caruso, R., et al., *A specific gene-microbe interaction drives the development of Crohn's*  
1169 *disease-like colitis in mice.* Sci Immunol, 2019. **4**: eaaw4341.
- 1170 40. Pizarro, T.T., et al., *SAMP1/YitFc mouse strain: a spontaneous model of Crohn's disease-*  
1171 *like ileitis.* Inflamm Bowel Dis, 2011. **17**:2566-84.
- 1172 41. Taurog, J.D., et al., *Inflammatory disease in HLA-B27 transgenic rats.* Immunol Rev,  
1173 1999. **169**:209-23.

- 1174 42. Adamji, M. and A.S. Day, *An overview of the role of exclusive enteral nutrition for*  
1175 *complicated Crohn's disease*. Intest Res, 2019. **17**:171-176.
- 1176 43. Kakade, M.L., et al., *Failure of soybean trypsin inhibitor to exert deleterious effects in*  
1177 *calves*. J Dairy Sci, 1976. **59**:1484-9.
- 1178 44. Packey, C.D. and R.B. Sartor, *Commensal bacteria, traditional and opportunistic*  
1179 *pathogens, dysbiosis and bacterial killing in inflammatory bowel diseases*. Curr Opin  
1180 Infect Dis, 2009. **22**:292-301.
- 1181 45. Pudlo, N.A., et al., *Phenotypic and Genomic Diversification in Complex Carbohydrate-*  
1182 *Degrading Human Gut Bacteria*. mSystems, 2022. **7**:e0094721.
- 1183 46. Steimle, A., et al., *Constructing a gnotobiotic mouse model with a synthetic human gut*  
1184 *microbiome to study host-microbe cross talk*. STAR Protoc, 2021. **2**:100607.
- 1185 47. Han, J., et al., *An isotope-labeled chemical derivatization method for the quantitation of*  
1186 *short-chain fatty acids in human feces by liquid chromatography-tandem mass*  
1187 *spectrometry*. Anal Chim Acta, 2015. **854**:86-94.
- 1188 48. Meira, L.B., et al., *DNA damage induced by chronic inflammation contributes to colon*  
1189 *carcinogenesis in mice*. J Clin Invest, 2008. **118**:2516-25.
- 1190 49. Kozich, J.J., et al., *Development of a dual-index sequencing strategy and curation*  
1191 *pipeline for analyzing amplicon sequence data on the MiSeq Illumina sequencing*  
1192 *platform*. Appl Environ Microbiol, 2013. **79**:5112-20.
- 1193 50. Schloss, P.D., et al., *Introducing mothur: open-source, platform-independent,*  
1194 *community-supported software for describing and comparing microbial communities*.  
1195 Appl Environ Microbiol, 2009. **75**:7537-41.
- 1196

## Figure 1

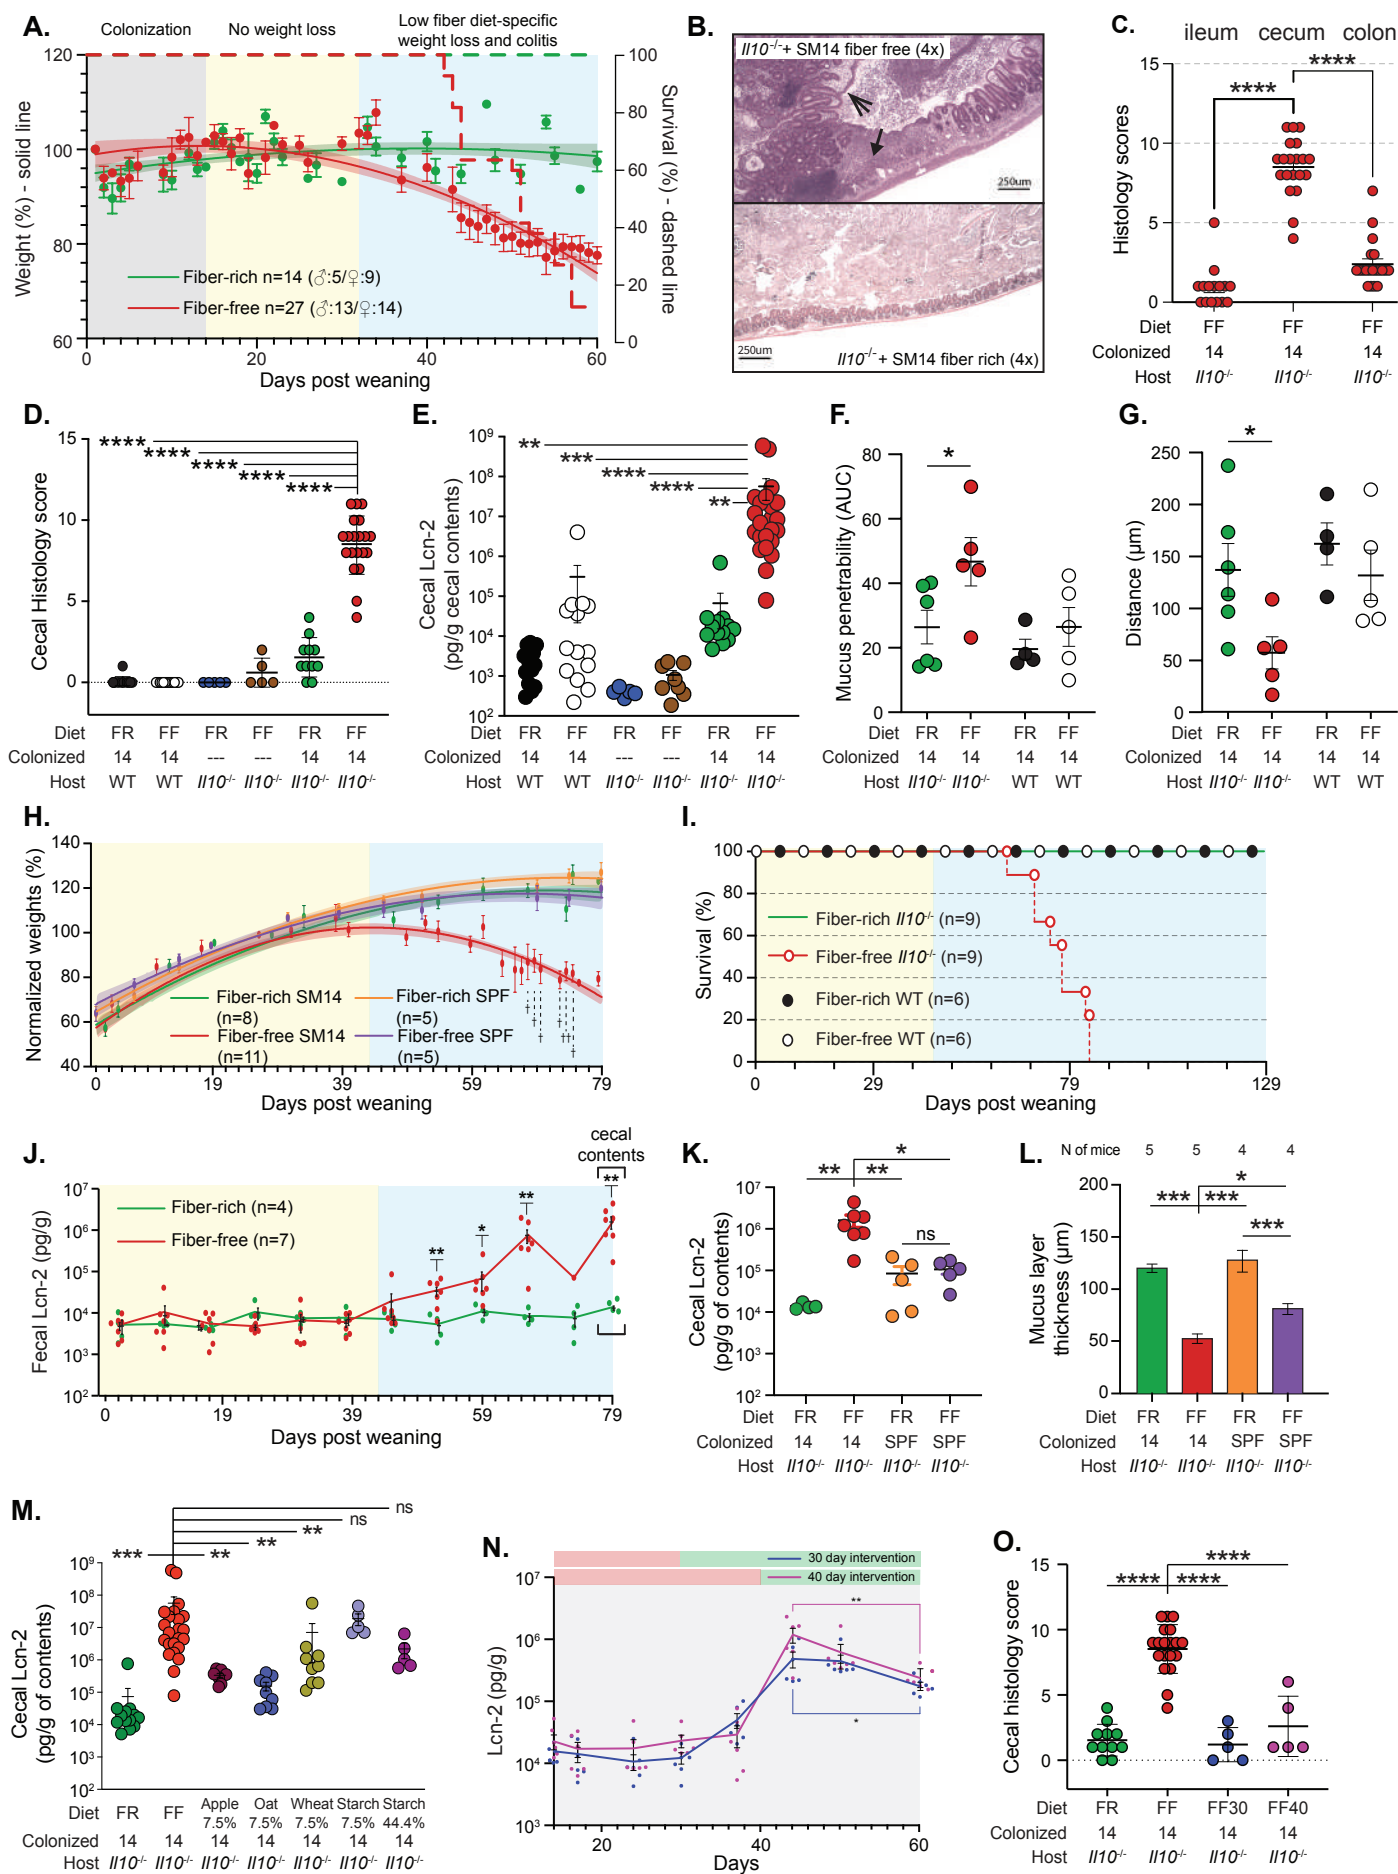



**Figure 1. Low fiber and microbiome driven disease development in  $Il10^{-/-}$  mice.** **A.** Weight trajectories of adult C57BL/6J  $Il10^{-/-}$  mice colonized with the human synthetic microbiota containing 14 species (SM14) and maintained on a fiber rich (FR) diet or switched to a fiber free (FF) diet after 14 d of colonization. Curves represent polynomial (quadratic) equations fit to all of the weights gathered at various days for the two treatments. Weights were measured more frequently after day 40 due to the declining health of the FF group and animals that were euthanized were excluded from the curve at later points. Two FF-fed animals from an early experiment were found dead on arrival and could not be included in subsequent analyses. All others were euthanized if they reached less than 80% starting weight and counted as lethality. The right axis shows survival in each group over time. The number of mice in each group, along with sexes are indicated in the figure legend. **B.** Representative cecal histology of FF (top) and FR (bottom) fed colonized  $Il10^{-/-}$  mice. In the top panel, block arrow points to a particularly large ulcer and the line arrow to an area of edema. Scale bars, 250  $\mu$ m. **C.** Quantitative, blinded histological scoring of ileal, cecal, and colonic tissue taken from colonized  $Il10^{-/-}$  mice fed the FF diet. Bold horizontal bar represents the mean and lighter error bars the S.E.M. (n=15–20, one-way ANOVA and post hoc test with Holm-Šidák's multiple comparison test) **D.** Quantitative, blinded histological scoring of cecal tissue taken from colonized  $Il10^{-/-}$  mice fed the FR and FF diets, along with additional treatments discussed in the text to manipulate individual diet (FR/FF), colonization (SM14 or germfree, latter indicated by dashed lines) and host genotype (wild-type, WT, or  $Il10^{-/-}$ ) variables. Here, and in subsequent panels, the red box highlights the condition with most severe inflammation. Bold horizontal bar represents the mean and lighter error bars the S.E.M. (n=5–20, two-way ANOVA and post hoc test with Original FDR method of Benjamini and Hochberg) **E.** Cecal lipocalin (*Lcn2*) measurements in the ceca of animal treatments shown in D. Bold horizontal bar represents the mean and lighter error bars the S.E.M. (n=5–23, two-way ANOVA and post hoc test with Original FDR method of Benjamini and Hochberg) **F.** Mucus penetrability by 1  $\mu$ m-sized beads in the distal colon of  $Il10^{-/-}$  and WT mice fed the FR and FF diets. **G.** Distance of 1  $\mu$ m-sized beads from the epithelium in the same mice as in F. **H.** Weight trajectories of  $Il10^{-/-}$  mice born to either SM14 or specific pathogen free (SPF) parents and weaned to FR or FF. By 79d post weaning (100d after birth), only the SM14, FF group displays weight loss. Curves represent polynomial (quadratic) equations fit to all of the weights gathered at various days for the two treatments. **I.** Survival curves for 4 separate groups of WT C57bl/6 or  $Il10^{-/-}$  mice colonized by parental transfer of SM14 bacteria at birth. All groups show 100% survival until 129d post weaning (150d total), except for FF fed mice which experience 100% lethality by 105d. **J.** Fecal *Lcn2* measurements over time in SM14 colonized  $Il10^{-/-}$  pups weaned to FR and FF. FF mice experience progressively increasing levels that are reciprocal with the weight trajectory shown in H. Middle horizontal bars represent the mean and flanking error bars the S.E.M. **K.** Endpoint cecal *Lcn2* levels in SM14 and SPF colonized mice. Bold horizontal bar represents the mean and lighter error bars the S.E.M. (n=4–7, two-way ANOVA and post hoc test with Original FDR method of Benjamini and Hochberg) **L.** Mucus thickness measurements in SM14 and SPF colonized mice. Bars represent the mean and error bars the S.E.M. Sample size is indicated below each treatment group. (n=4–5, two-way ANOVA and post hoc test with Original FDR method of Benjamini and Hochberg) **M.** Cecal *Lcn2* measurements in mice fed versions of the FF diet with glucose replaced by dietary fiber from apple, wheat, oat or soluble starch. Concentrations of each addition are noted below the ingredient. Bold horizontal bar represents the mean and lighter error bars the S.E.M. (n=5–23, two-way ANOVA and post hoc test with Original FDR method of Benjamini and Hochberg) **N.** Fecal *Lcn2* measurements over time in SM14 colonized adult mice, which were shifted to FF at 14d post colonization and then shifted back to FR at either 30d or 40d. For each time point and treatment the mean is shown along with individual points and error bars represent S.E.M. **O.** Endpoint histological evaluation of the cecal tissue from mice shown in N. compared to mice maintained on FR or FF. (n=5–20, two-way ANOVA and post hoc test with Original FDR method of Benjamini and Hochberg) The experiments for data in panels F. and G. were done at the University of Luxembourg animal facility. All other experiments were done at the University of Michigan animal facility. P values: \* < 0.05; \*\* < 0.01; \*\*\* < 0.001; \*\*\*\* < 0.0001; ns = not significant.

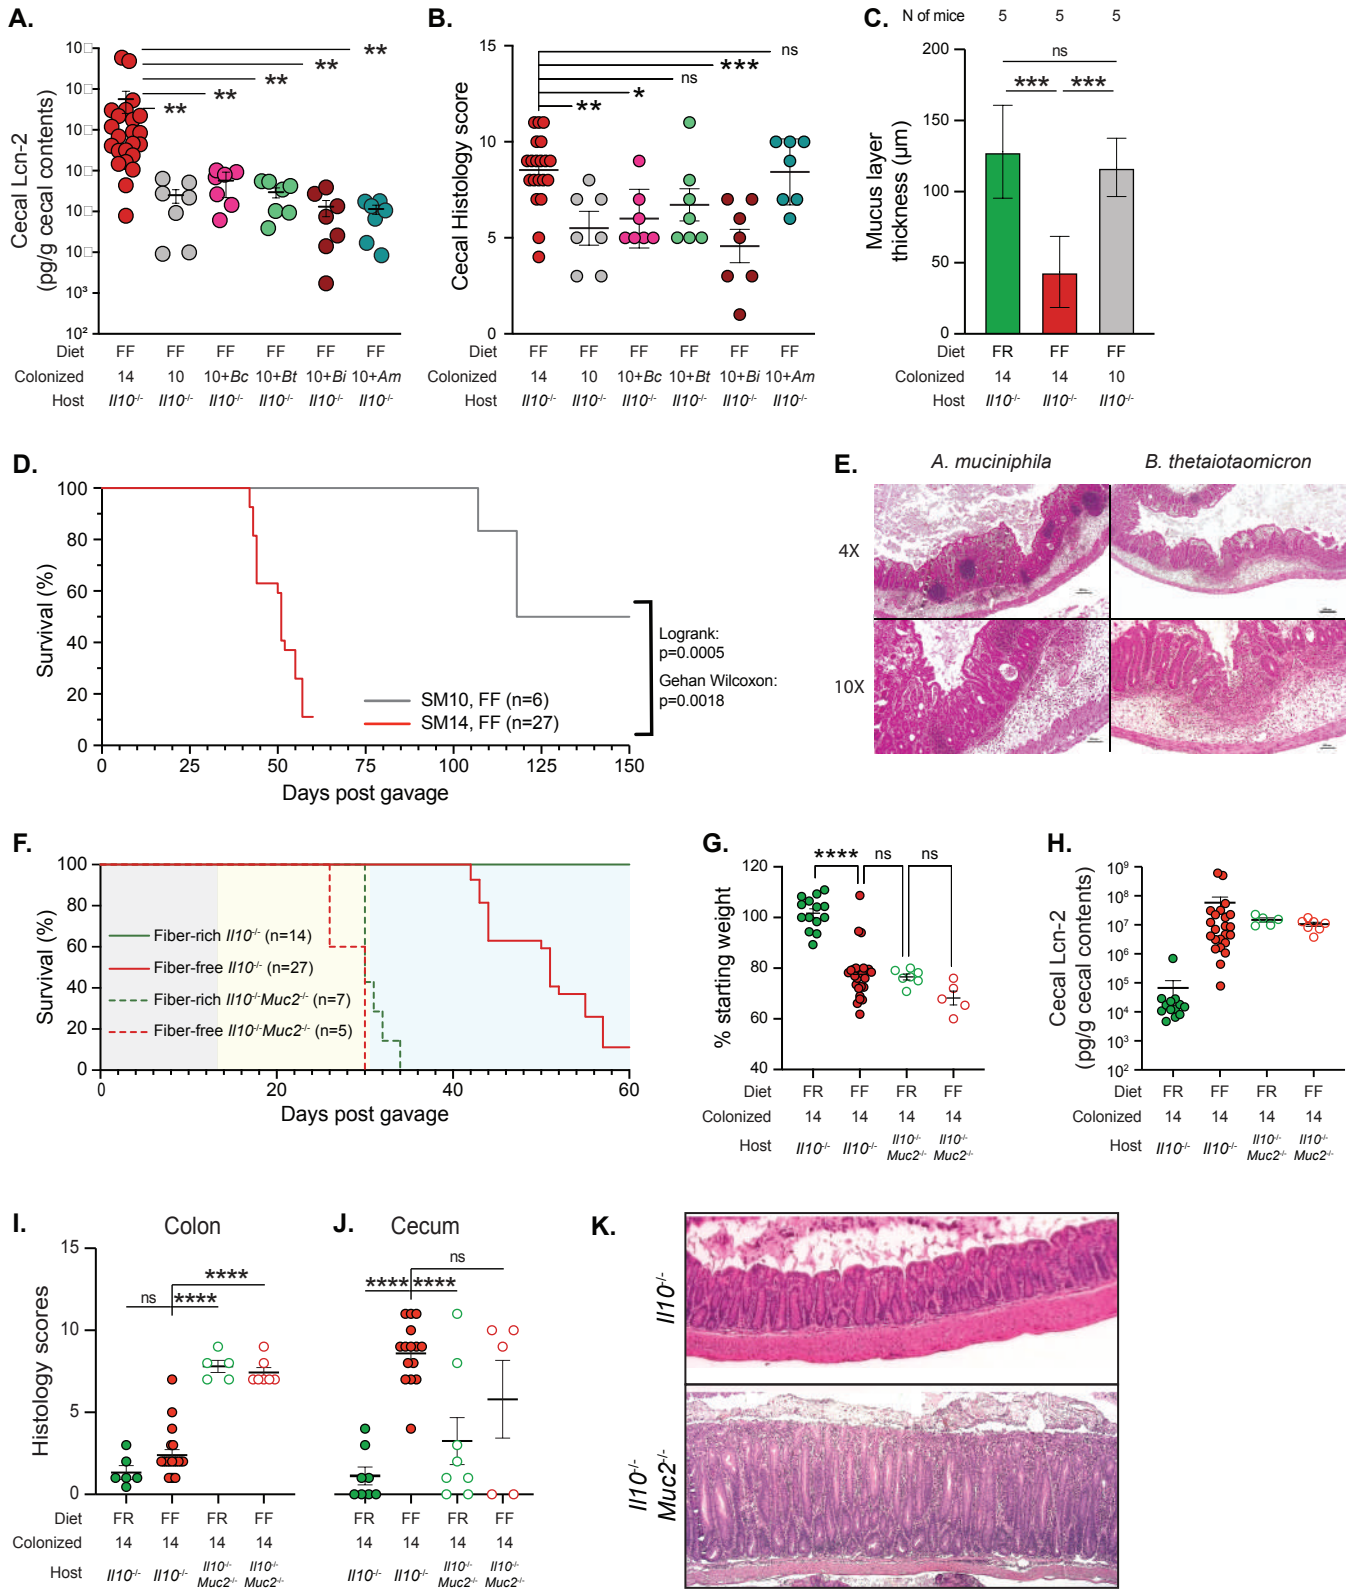



**Figure 2. Mucus integrity is central to diet-induced inflammation development.** **A.** Cecal lipocalin (Lcn2) measurements in  $Il10^{-/-}$  mice with full or reduced complexity synthetic microbiota as indicated in the “Colonized” line below each graph: Full 14 species SM (“14”), just the 10 species that do not degrade mucin *O*-glycans in vitro (“10”), or 10 non mucin-degrading species plus individual mucin degraders, *B. thetaiotaomicron* (*Bt*), *B. caccae* (*Bc*), *B. intestinhominis* (*Bi*) or *A. muciniphila* (*Am*). Bold horizontal bar represents the mean and lighter error bars the S.E.M. (n=7–23, two-way ANOVA and post hoc test with Original FDR method of Benjamini and Hochberg) **B.** Cecal histology scores of the same treatment group shown in A. (n=5–20, two-way ANOVA and post hoc test with Original FDR method of Benjamini and Hochberg) **C.** Mucus thickness measurements of SM10 colonized mice fed the FF diet (gray) compared to SM14 colonized mice fed either diet. (n=5, two-way ANOVA and post hoc test with Original FDR method of Benjamini and Hochberg) **D.** Survival curves of  $Il10^{-/-}$  adult mice colonized with SM14 and SM10 to a maximum of 150d. **E.** Representative histology images of SM10, SM10+*Bt* and SM10+*Am*. **F.** Survival curves of  $Il10^{-/-}$  and DKO adult mice colonized with the SM14. **G.-J.** Individual endpoint weight loss (G.), Cecal Lcn2 (H.), colon histology (I.) and cecal histology (J.) for SM14-colonized  $Il10^{-/-}$ Muc2<sup>-/-</sup> double knockout (DKO) mice fed the FR or FF diets. In all three panels the mean is shown and error bars represent the S.E.M. (n=5-23, two-way ANOVA and post hoc test with Original FDR method of Benjamini and Hochberg) **K.** Comparison of colon histology in  $Il10^{-/-}$  (top) and DKO (bottom) mice showing worse disease in DKO mice.

### Figure 3

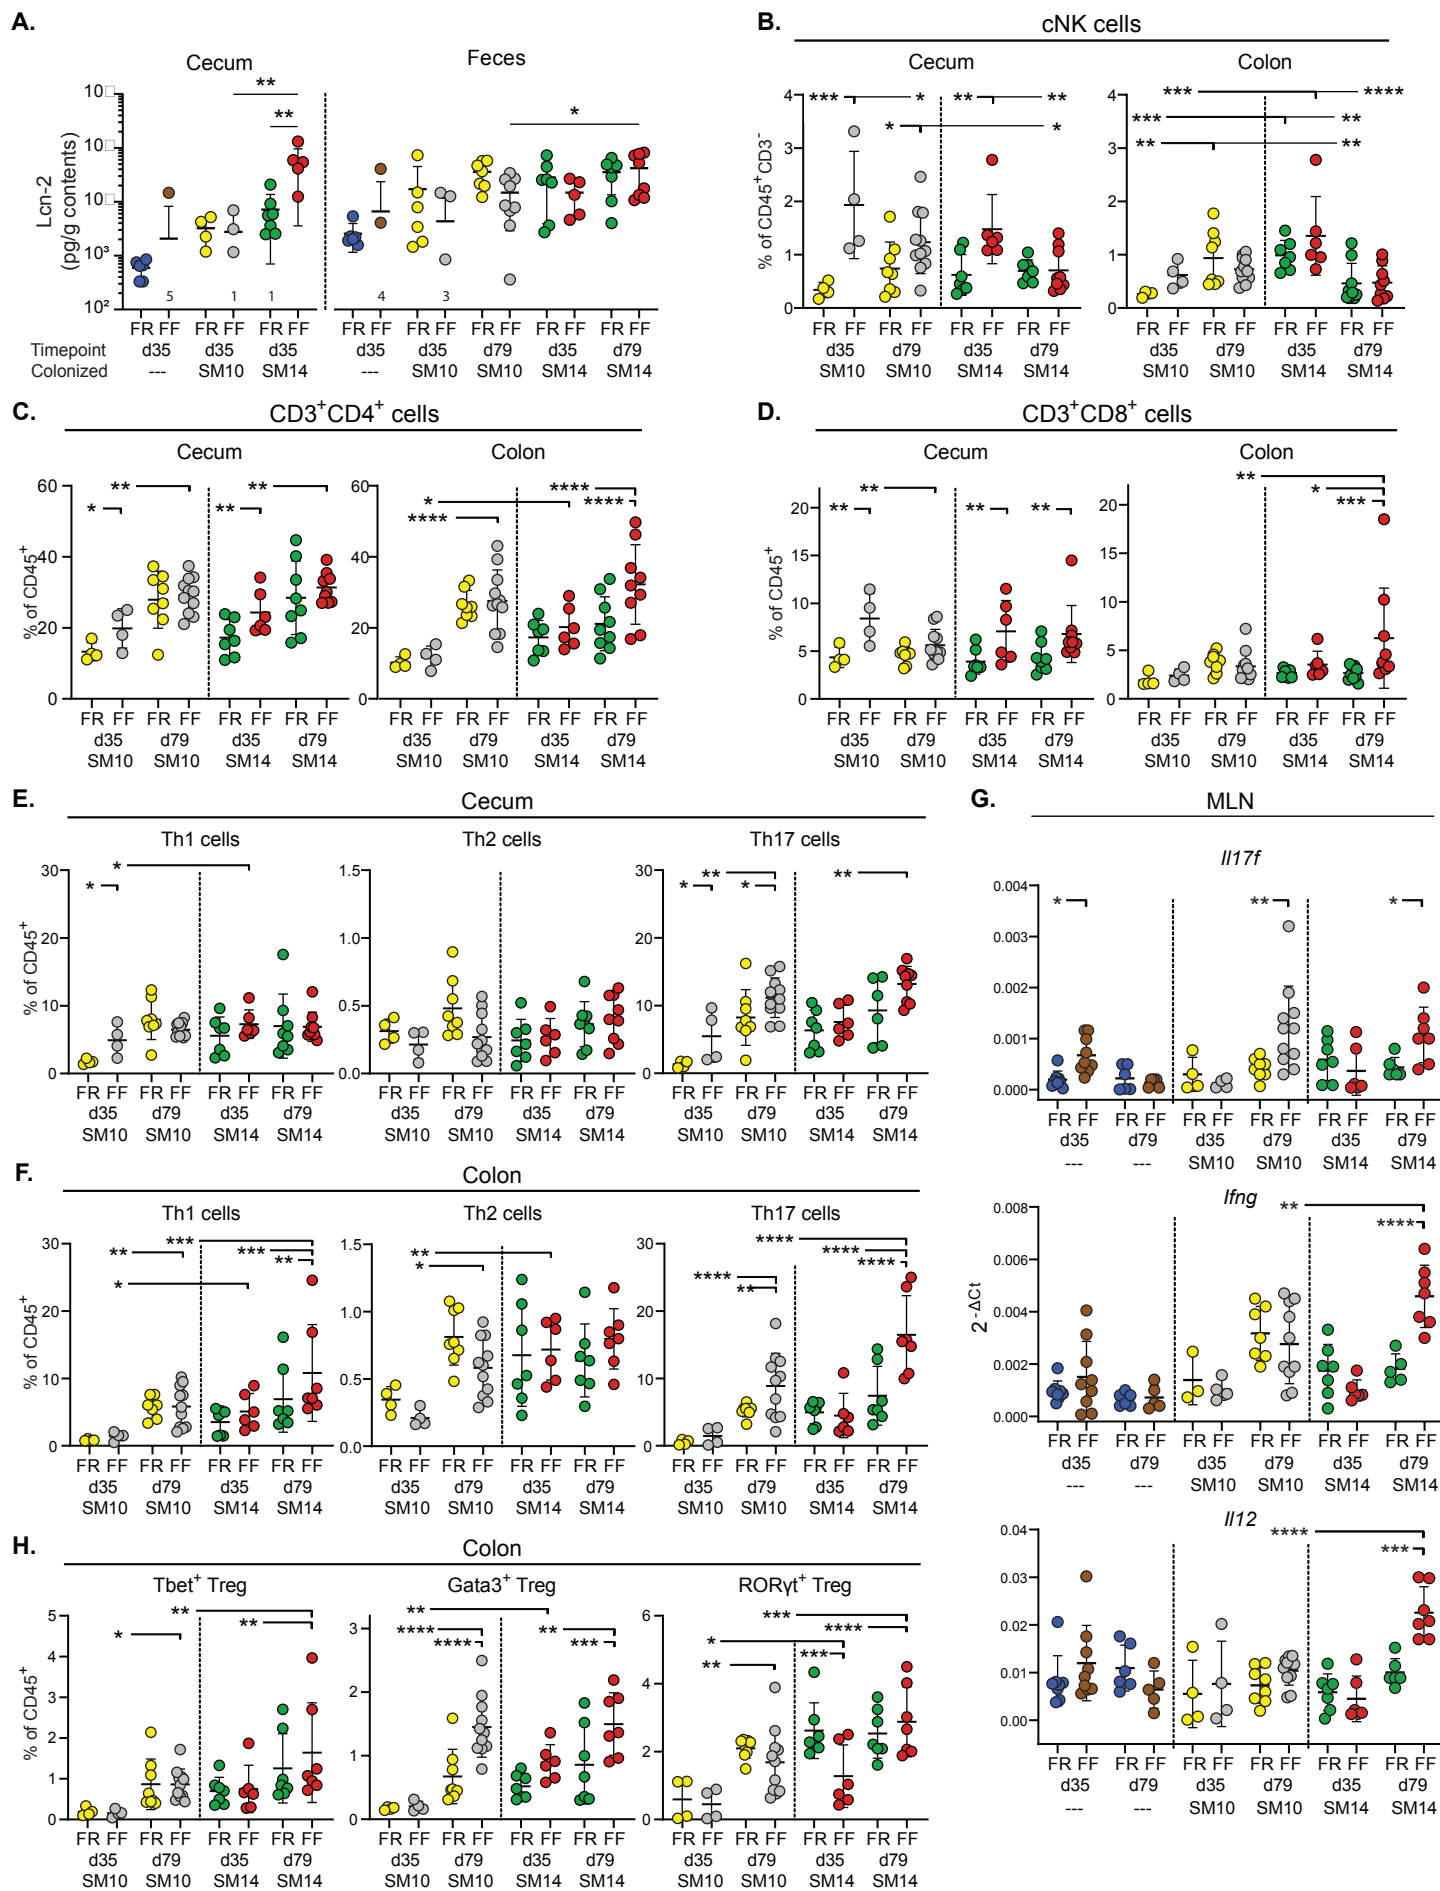

**Figure 3. Mucolytic bacteria influence the inflammatory pathways of colitis.** **A.** Lipocalin-2 levels in the cecal contents and feces of GF and colonized  $Il10^{-/-}$  mice (n=4–7, two-way ANOVA and post hoc test with Original FDR method of Benjamini and Hochberg). **B.** Proportion of NK cells among CD3-CD45+ cells in the cecum and colon lamina propria of SM10- and SM14-colonized  $Il10^{-/-}$  mice (n=4–11, two-way ANOVA and post hoc test with Original FDR method of Benjamini and Hochberg). **C.** Proportion of CD3+CD4+ cells among CD45+ cells in the cecum and colon of SM10- and SM14-colonized  $Il10^{-/-}$  mice (n=4–11, two-way ANOVA and post hoc test with Original FDR method of Benjamini and Hochberg). **D.** Proportion of CD3+CD8+ cells among CD45+ cells in the cecum and colon of SM10- and SM14-colonized  $Il10^{-/-}$  mice (n=4–11, two-way ANOVA and post hoc test with Original FDR method of Benjamini and Hochberg). **E.-F.** Proportion of helper T (Th) cell subsets (defined as CD3+ CD4+ Foxp3-) among CD45+ cells in the (E) cecum and (F) colon of SM10- and SM14-colonized  $Il10^{-/-}$  mice (n=4–11, two-way ANOVA and post hoc test with Original FDR method of Benjamini and Hochberg). **G.** Cytokine mRNA levels in the Mesenteric Lymph Nodes (MLN) of  $Il10^{-/-}$  mice (n=4–11, two-way ANOVA and post hoc test with Original FDR method of Benjamini and Hochberg). **H.** Proportion of regulatory T cell subsets among CD45+ cells in the colon of SM10- and SM14-colonized  $Il10^{-/-}$  mice (n=4–11, two-way ANOVA and post hoc test with Original FDR method of Benjamini and Hochberg). Data are represented as mean  $\pm$  SD. \*p < 0.05; \*\*p < 0.01; \*\*\*p < 0.001; \*\*\*\*p < 0.0001.

# Figure 4

bioRxiv preprint doi: <https://doi.org/10.1101/2022.04.03.486886>; this version posted January 26, 2023. The copyright holder for this preprint (which was not certified by peer review) is the author/funder. All rights reserved. No reuse allowed without permission.

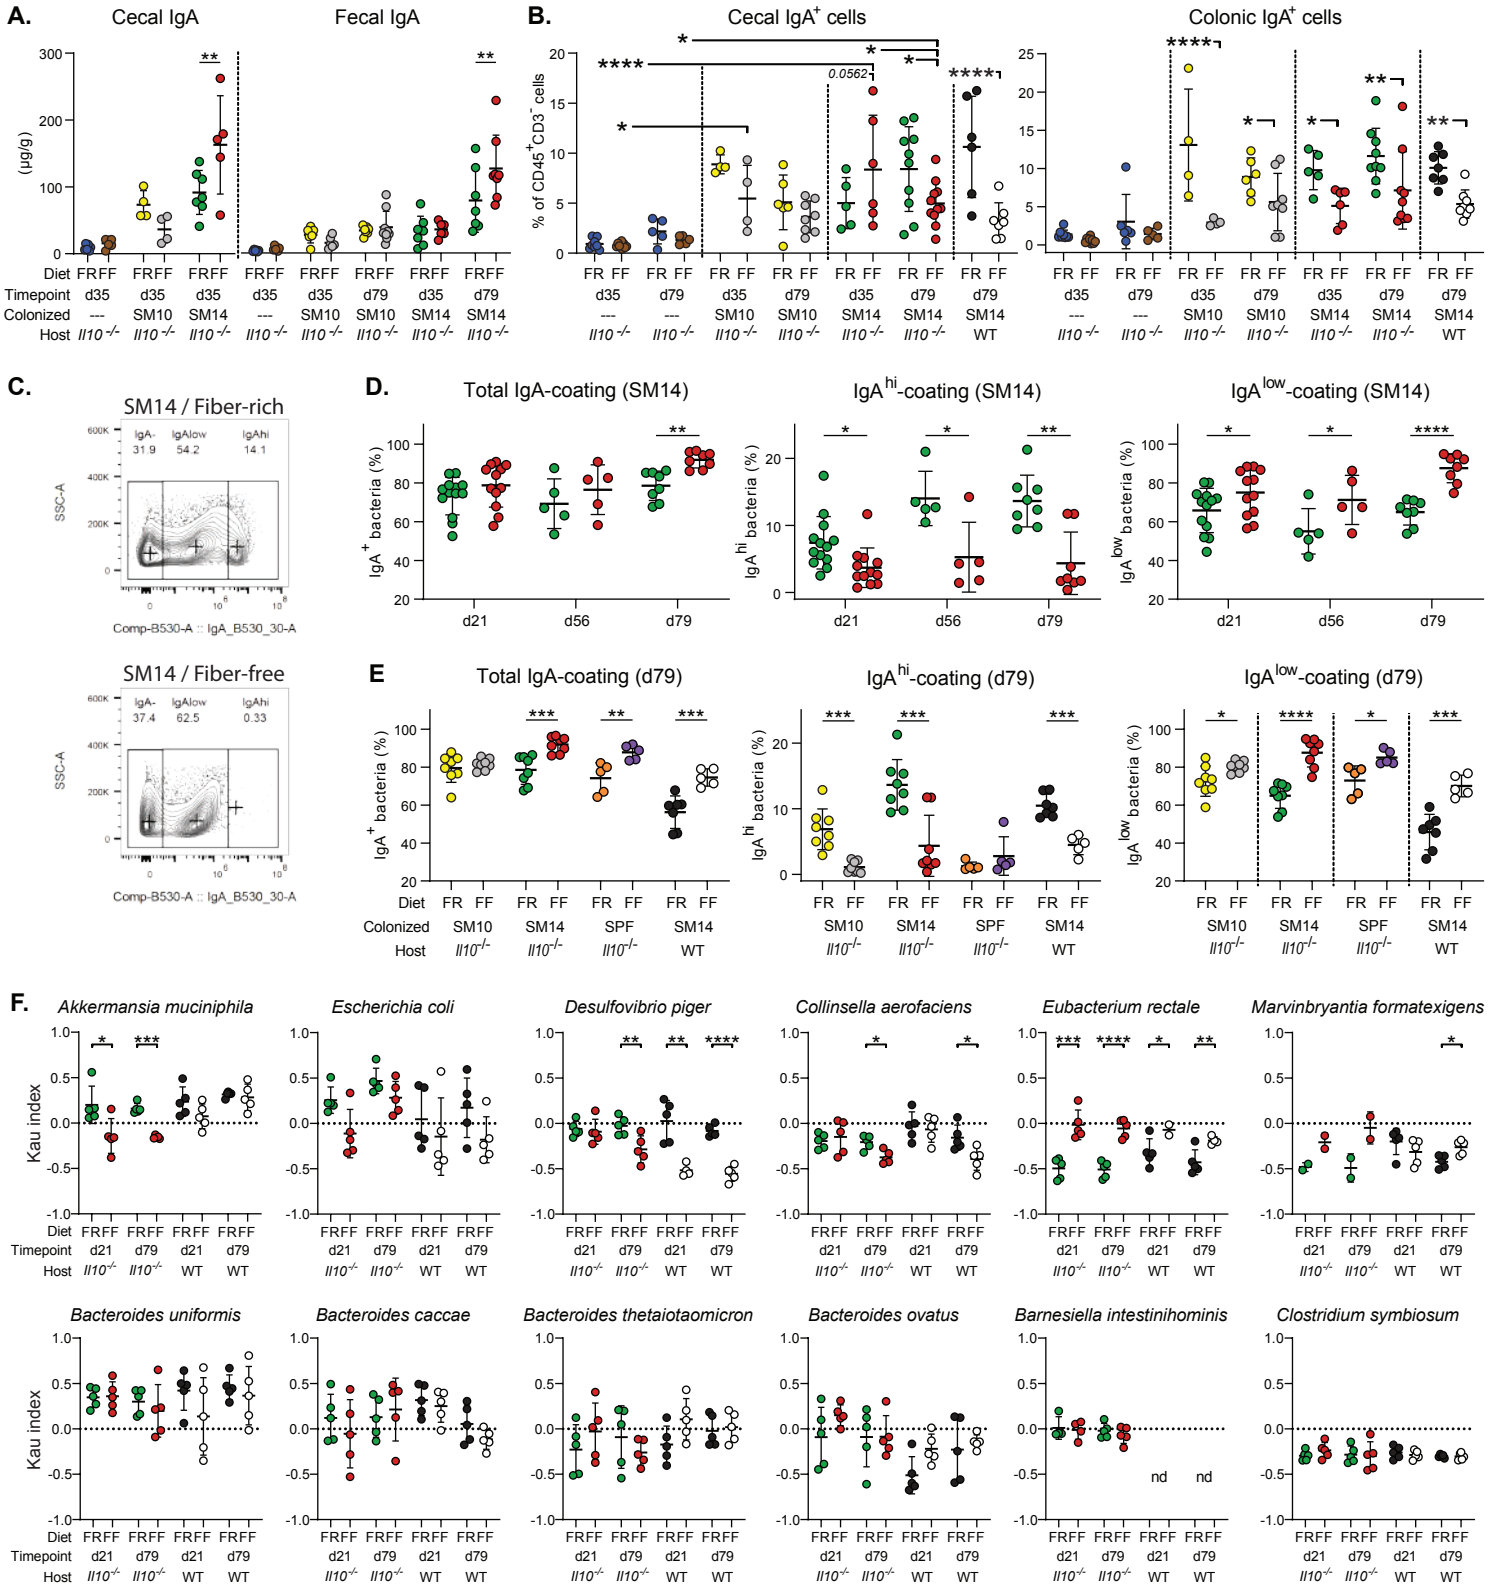

**Figure 4. Fiber deprivation alters IgA–bacteria interactions in a microbial species-specific manner.** **A.** Concentration of free IgA in the cecal content and feces of GF and colonized  $Il10^{-/-}$  mice (n=4–9, two-way ANOVA and post hoc test with the two-stage linear step-up procedure of Benjamini, Krieger and Yekutieli). **B.** Proportion of IgA-producing cells among CD3-CD45+ cells in the cecum (left) and colon (right) of GF SM10- and SM14-colonized  $Il10^{-/-}$  and WT mice (n=4–11, two-way ANOVA and post hoc test with the two-stage linear step-up procedure of Benjamini, Krieger and Yekutieli). **C.** IgA-coating profiles of fecal bacteria from SM14-colonized mice fed a FR (top) or a FF (bottom) diet for 56 days showing the gating strategy of population being low-coated ( $IgA^{low}$ ) and high-coated ( $IgA^{high}$ ). **D.-E.** Total IgA coating shown in panels D.–E. consists of the addition of  $IgA^{high}$  and  $IgA^{low}$  coating. (D) Percentages of total (left),  $IgA^{high}$  (middle) and  $IgA^{low}$  (right) -coated bacteria as shown in (C) in the feces of FR- and FF-fed, SM14-colonized mice at 21, 56 and 79 dpw (n=5–13, two-way ANOVA and post hoc test with the two-stage linear step-up procedure of Benjamini, Krieger and Yekutieli). (E) Percentages of total (left),  $IgA^{high}$  (middle) and  $IgA^{low}$  (right) -coated bacteria as shown in (C) in the feces of SM10-, SM14- or SPF-colonized  $Il10^{-/-}$  mice and SM14-colonized WT mice fed the FR or the FF diet for 79 days (n=5–8, two-way ANOVA and post hoc test with the two-stage linear step-up procedure of Benjamini, Krieger and Yekutieli). **F.** IgA-coating index (Kau index) of fecal bacteria from SM14-colonized  $Il10^{-/-}$  and WT mice (n=2–5, multiple unpaired t-test and post hoc test with the two-stage linear step-up procedure of Benjamini, Krieger and Yekutieli). Data are represented as mean  $\pm$  SD. \*p < 0.05; \*\*p < 0.01; \*\*\*p < 0.001; \*\*\*\*p < 0.0001.

## Figure 5

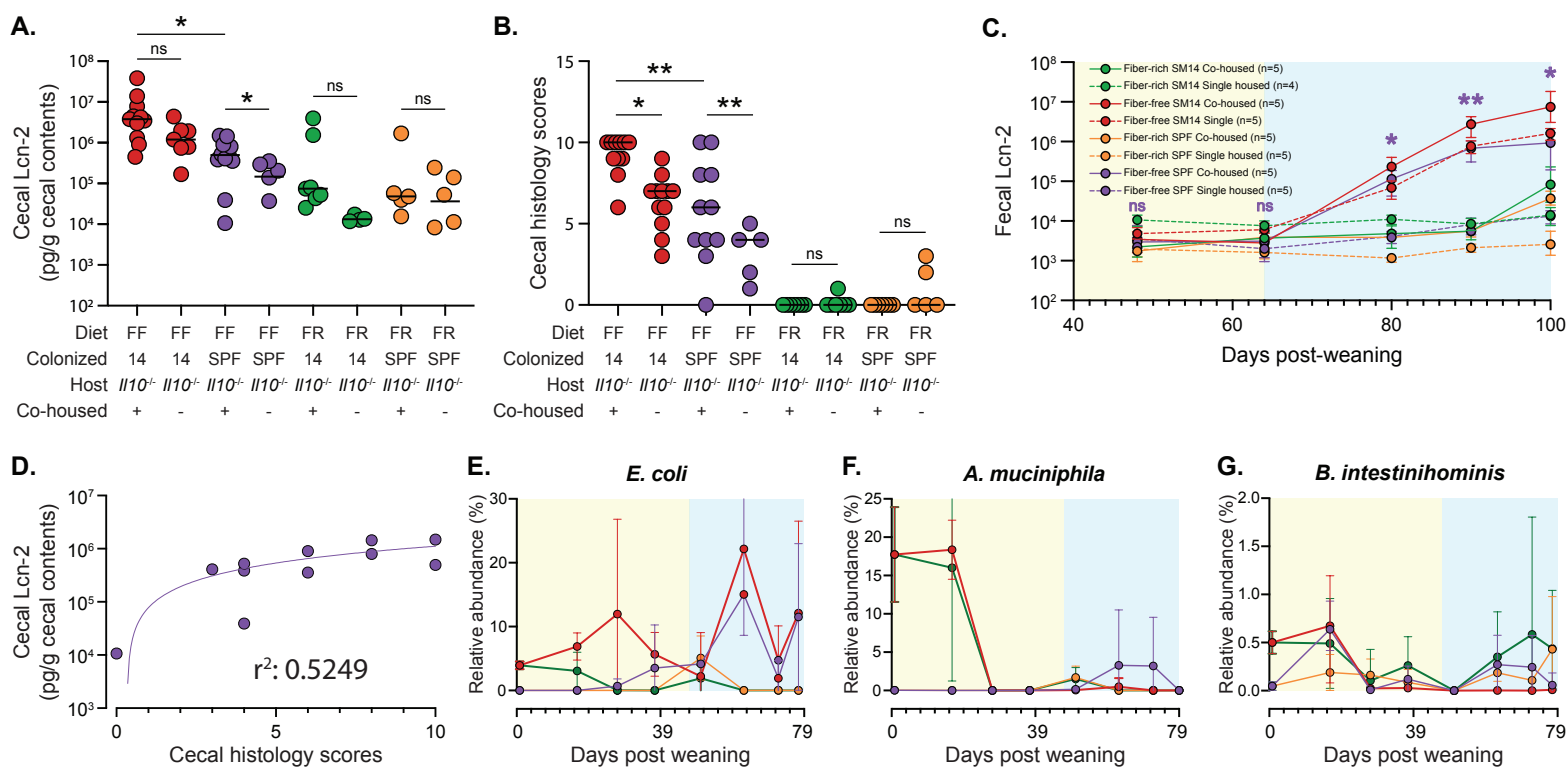

**Figure 5. Co-housing SPF mice with SM14 colonized mice after weaning worsens disease. A.** Cecal lipocalin (Lcn2) levels in co-housed or non-co-housed SPF and SM14 mice (co-housing status is indicated at the bottom of this and subsequent panels as appropriate). (n=5-11, one-sample Student's t-test and Wilcoxon test) **B.** Cecal histology of the same treatments shown in A. (n=5-11, one-sample Student's t-test and Wilcoxon test) **C.** Cecal Lcn2 over time in co-housed and non-co-housed SPF and SM14 mice showing inflammatory response starting between 60–80d. Note the difference in the group born SPF when co-housed or not and shown in solid or dashed purple lines. **D.** Correlation of cecal Lcn2 and cecum histology scores of co-housed SM14/SPF fed FF diet showing similarity between these two measurements in individuals. **E.–G.** Relative abundance of SM14 species invading SPF co-housed mice, *E. coli*, *A. muciniphila*, *B. intestinihominis*, respectively. Data are represented as mean  $\pm$  SEM. \*p < 0.05; \*\*p < 0.01; \*\*\*p < 0.001; \*\*\*\*p < 0.0001.



## Figure 6

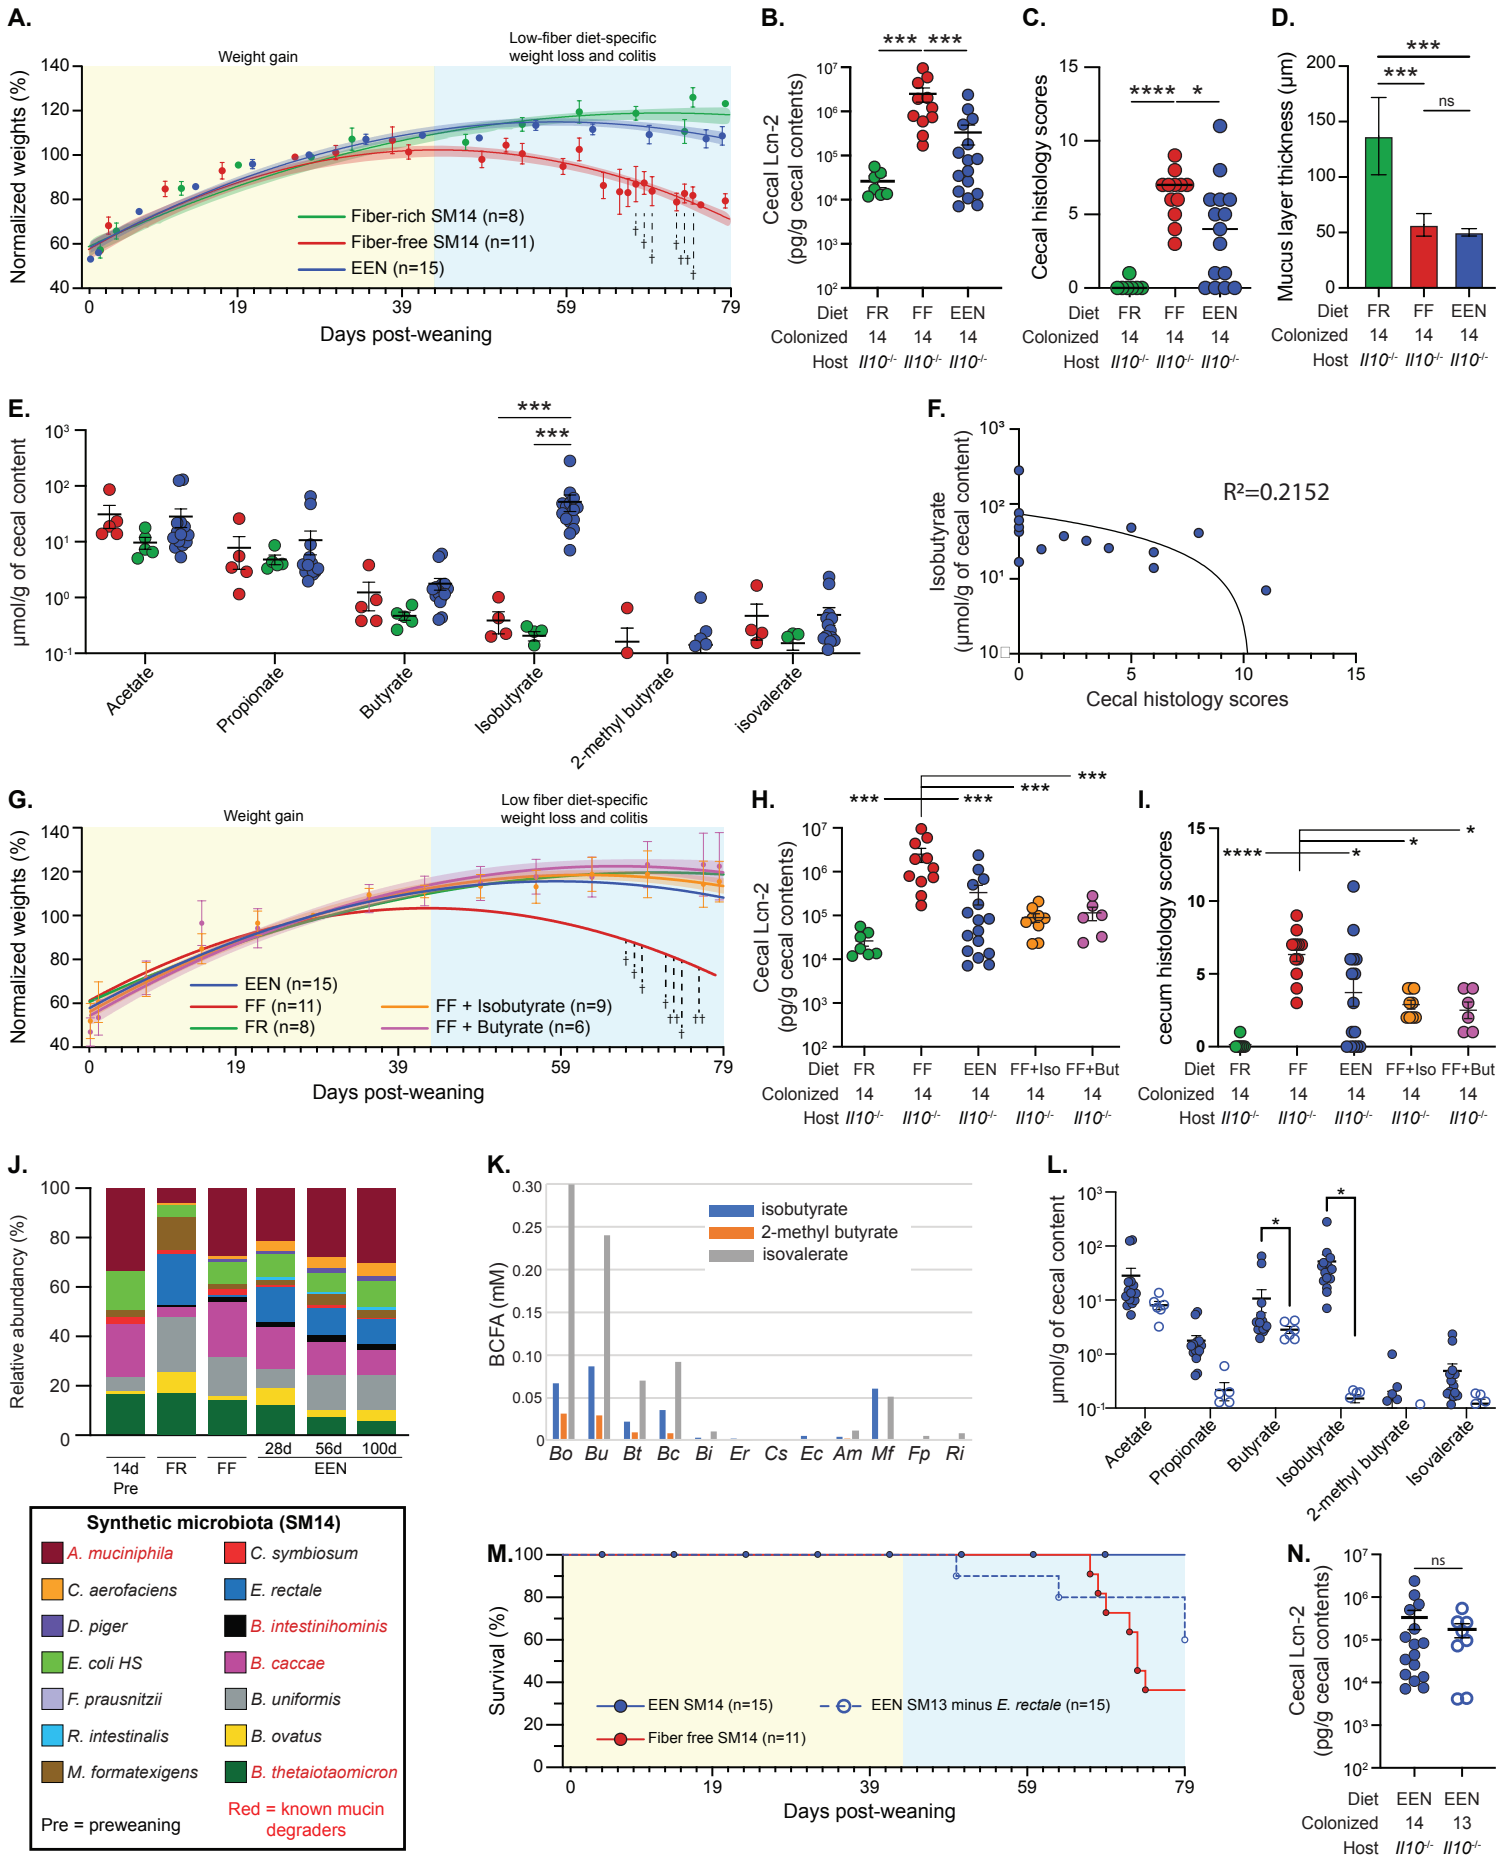

**Figure 6. A fiber free exclusive enteral nutrition (EEN) diet improves inflammation in part through isobutyrate production.** **A.** Weight trajectories of mice weaned onto FR, FF, and EEN diets. **B.** Cecal lipocalin levels of mice weaned onto FF, FR, and EEN diets. (n=7-15, two-way ANOVA and post hoc test with Original FDR method of Benjamini and Hochberg) **C.** Cecal histology scores of the same mice shown in B. (n=7-15, two-way ANOVA and post hoc test with Original FDR method of Benjamini and Hochberg) **D.** Mucus thickness measurements in mice shown in B. and C. revealing that the EEN diet does promote mucus thinning despite dampening disease in some individuals. (n=5, two-way ANOVA and post hoc test with Original FDR method of Benjamini and Hochberg) **E.** Short-chain and branched-chain fatty acid measurements in mice fed FF, FR, or EEN diets. (n=5-15, two-way ANOVA and post hoc test with Original FDR method of Benjamini and Hochberg) **F.** Correlation between isobutyrate production and Lcn2 levels. **G.** Weight trajectories of mice fed the FF diet and water supplemented with either 35mM isobutyrate (orange) or butyrate (purple). (n=6-15, two-way ANOVA and post hoc test with Original FDR method of Benjamini and Hochberg) **H.** Cecal Lcn2 levels in the mice from panel G. **I.** Cecal histology scores of the mice shown in G. (n=6-15, two-way ANOVA and post hoc test with Original FDR method of Benjamini and Hochberg) **J.** SM14 community composition in mice fed the FR, FF and EEN diets. Note the similarity of preweaned mice to adults fed FF and the 250-fold increase in *E. rectale* after feeding the EEN diet. **K.** Short and branched chain fatty acid measurements in culture supernatants of individual SM14 bacteria. **L.** Short and branched chain fatty acid measurements in EEN fed mice colonized with either the full SM14 (closed symbols) or an SM13 that lacks *E. rectale*. (n=6-15, one-sample Student's t-test and Wilcoxon test) **M.** Survival of SM14 and SM13 (minus *E. rectale*) colonized mice on the FF and EEN diets. **N.** Cecal Lcn2 measurements of the mice shown in M. (n=6-15, one-sample Student's t-test and Wilcoxon test) Data are represented as mean  $\pm$  SEM. \*p < 0.05; \*\*p < 0.01; \*\*\*p < 0.001; \*\*\*\*p < 0.0001.

## Figure ED1

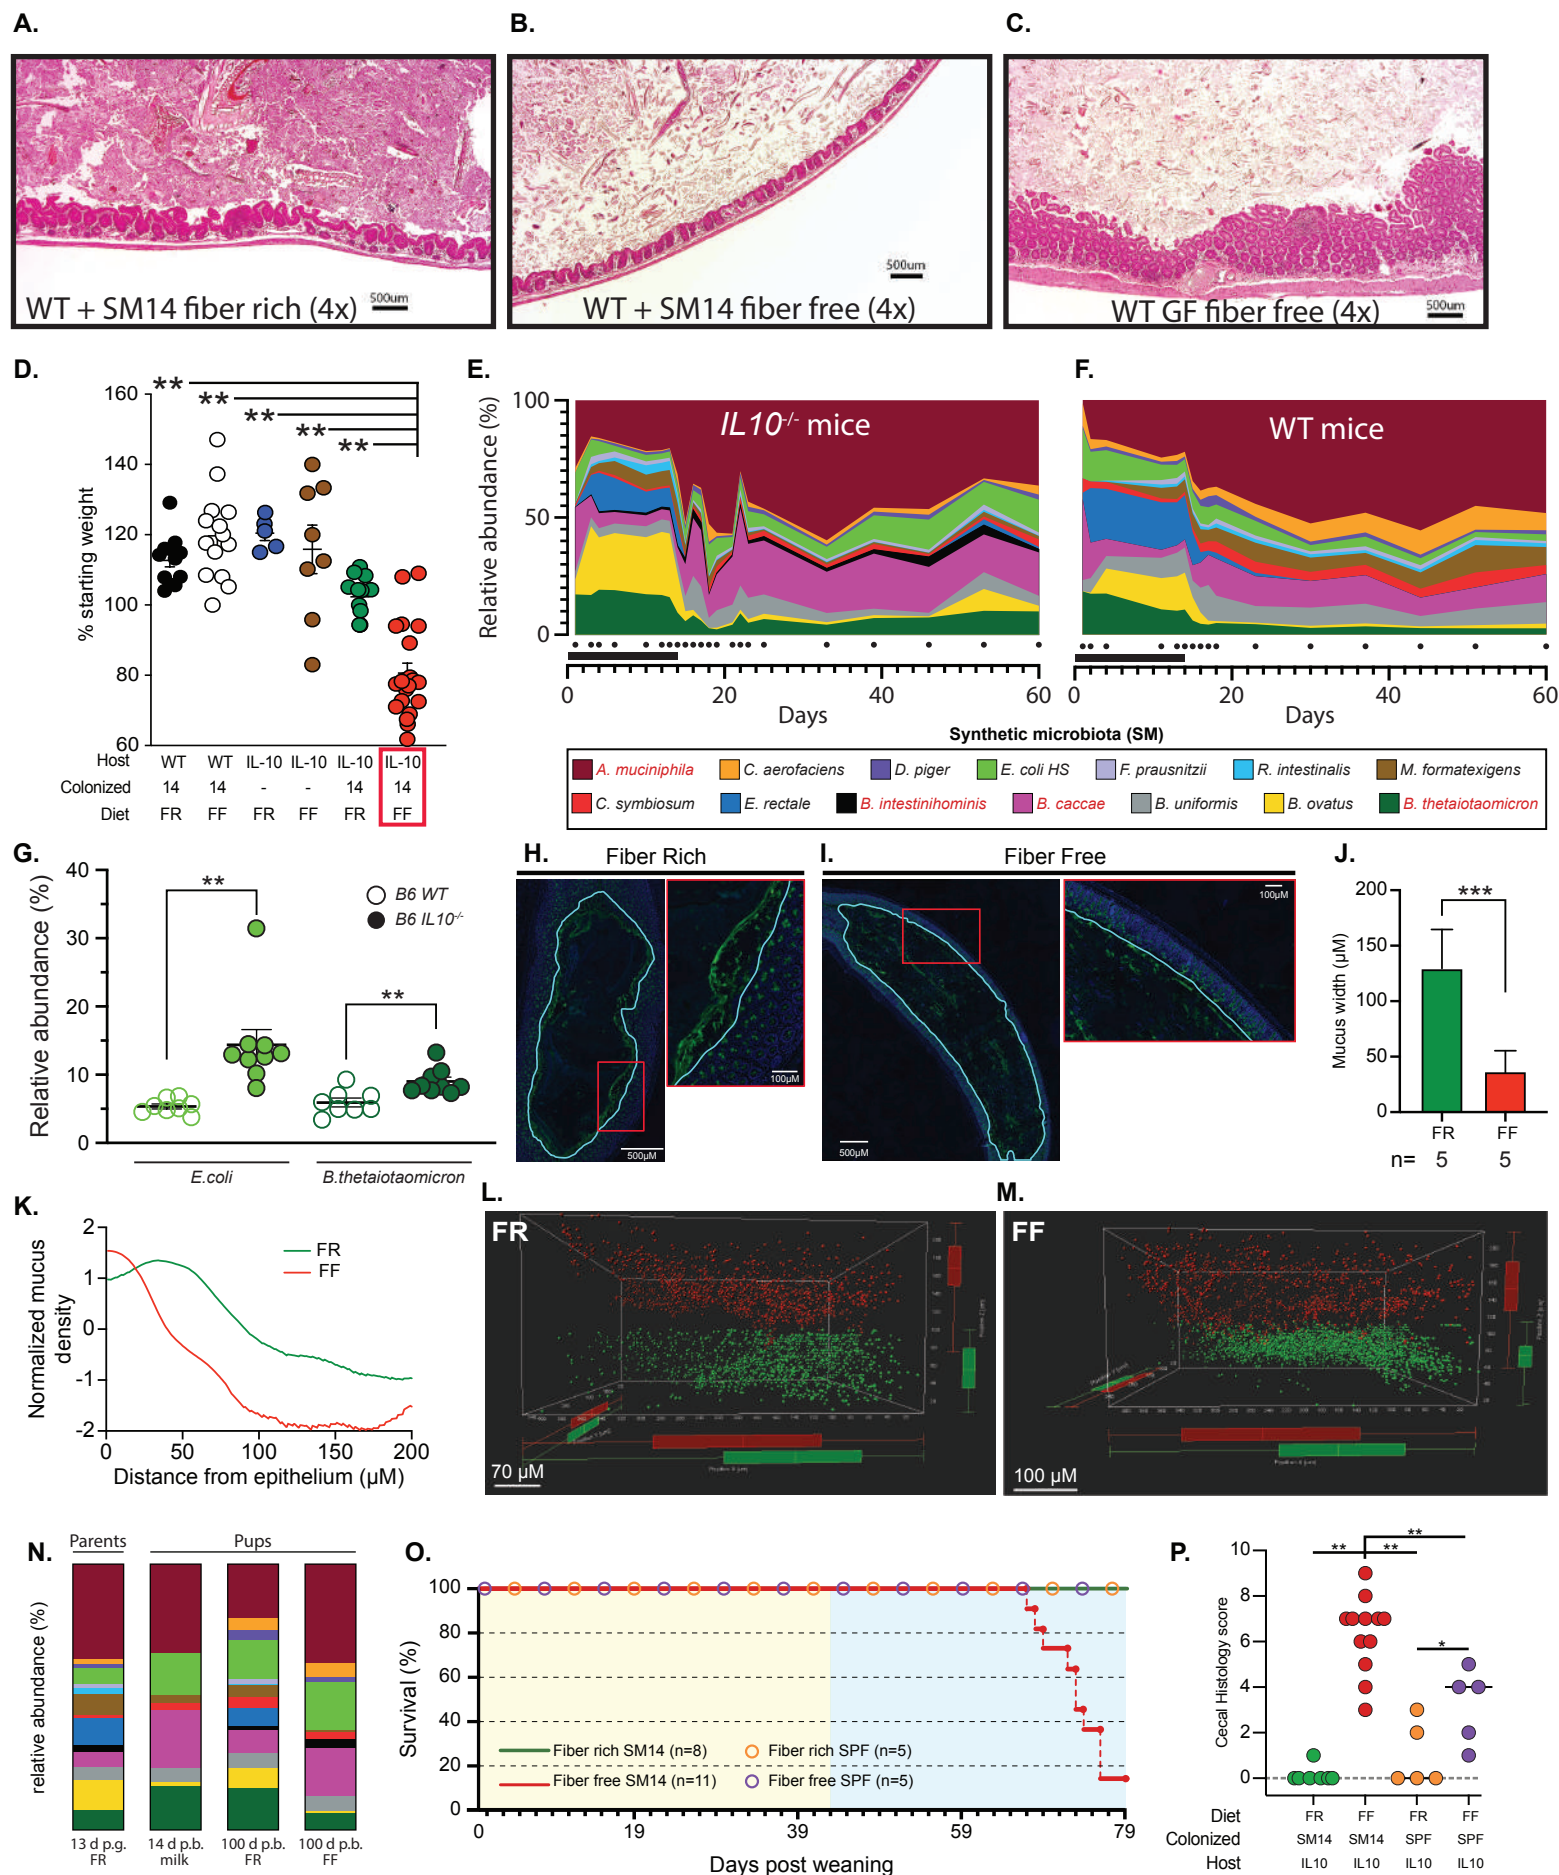

**Extended Data Figure 1. Low fiber and microbiome driven disease development in  $Il10^{-/-}$  mice.**

**A.-C.** Representative histology from wild-type (WT) SM14-colonized mice fed FR (A.), WT SM14-colonized mice fed FF (B.) or WT germfree mice fed FF (C.). All pictures are shown at 4x magnification, bars 500 $\mu$ M. **D.** Endpoint weights of the mice shown in Fig. 1A. Bold horizontal bar represents the mean and lighter error bars the S.E.M. (n=7–20, two-way ANOVA and post hoc test with Original FDR method of Benjamini and Hochberg) **E.–F.** Relative abundance streamplots of SM14 bacteria in  $Il10^{-/-}$  (E.) or wild-type (F.) mice shifted to the FF diet at 14d after colonization. Dots below the graph indicate the time points at which feces was sampled and the black bar on the x-axis represents the period of FR feeding. **G.** Comparison of cecal *E. coli* and *B. thetaiotaomicron* populations in  $Il10^{-/-}$  vs WT mice after 60d of colonization. Bold horizontal bar represents the mean and lighter error bars the S.E.M. (n=8-9, one-sample Student's t-test and Wilcoxon test) **H.–I.** Representative staining and imaging for Muc2 (green) in colonic sections from FR (H.) or FF (I.) and counter-stained with DAPI (blue). These images were used for automated mucus measurement using BacSpace software [13] as described in methods. **J.** Automated mucus thickness measurements generated from colonic section images like those shown in H.–I. (n=5, one-sample Student's t-test and Wilcoxon test) Five mice were measured per treatment, with a total of 1–2 fecal mass sections imaged per mouse. **K.** Averaged Muc2 staining intensity measurements for the mice represented in H.-J. as a function of distance from the epithelium. **L.–M.** Representative visualization of 1  $\mu$ m-sized beads (in red) layered on the distal colon epithelium (in green) after feeding FR (L.) or FF (M.). The space between the beads and epithelial cells represents the penetrability of the mucus layer. **N.** Representative SM14 composition in adult mice fed FR at 13d post gavage (p.g.) compared to still suckling pups at 14d post birth (p.b.) and 100d old SM14 colonized pups that were weaned onto either FR or FF diets. **O.** Survival plot of SM14 or SPF colonized pups weaned onto FR or FF diets and maintained for a total of 100d, the typical experimental duration. **P.** Cecal histology scores for SM14 or SPF colonized pups weaned onto FR or FF diets and maintained for a total of 100d. **P.** Cecal histology scores for SM14 or SPF colonized pups weaned onto FR or FF diets. Bold horizontal bar represents the mean and lighter error bars the S.E.M. (n=5–12, two-way ANOVA and post hoc test with Original FDR method of Benjamini and Hochberg).

## Figure ED2

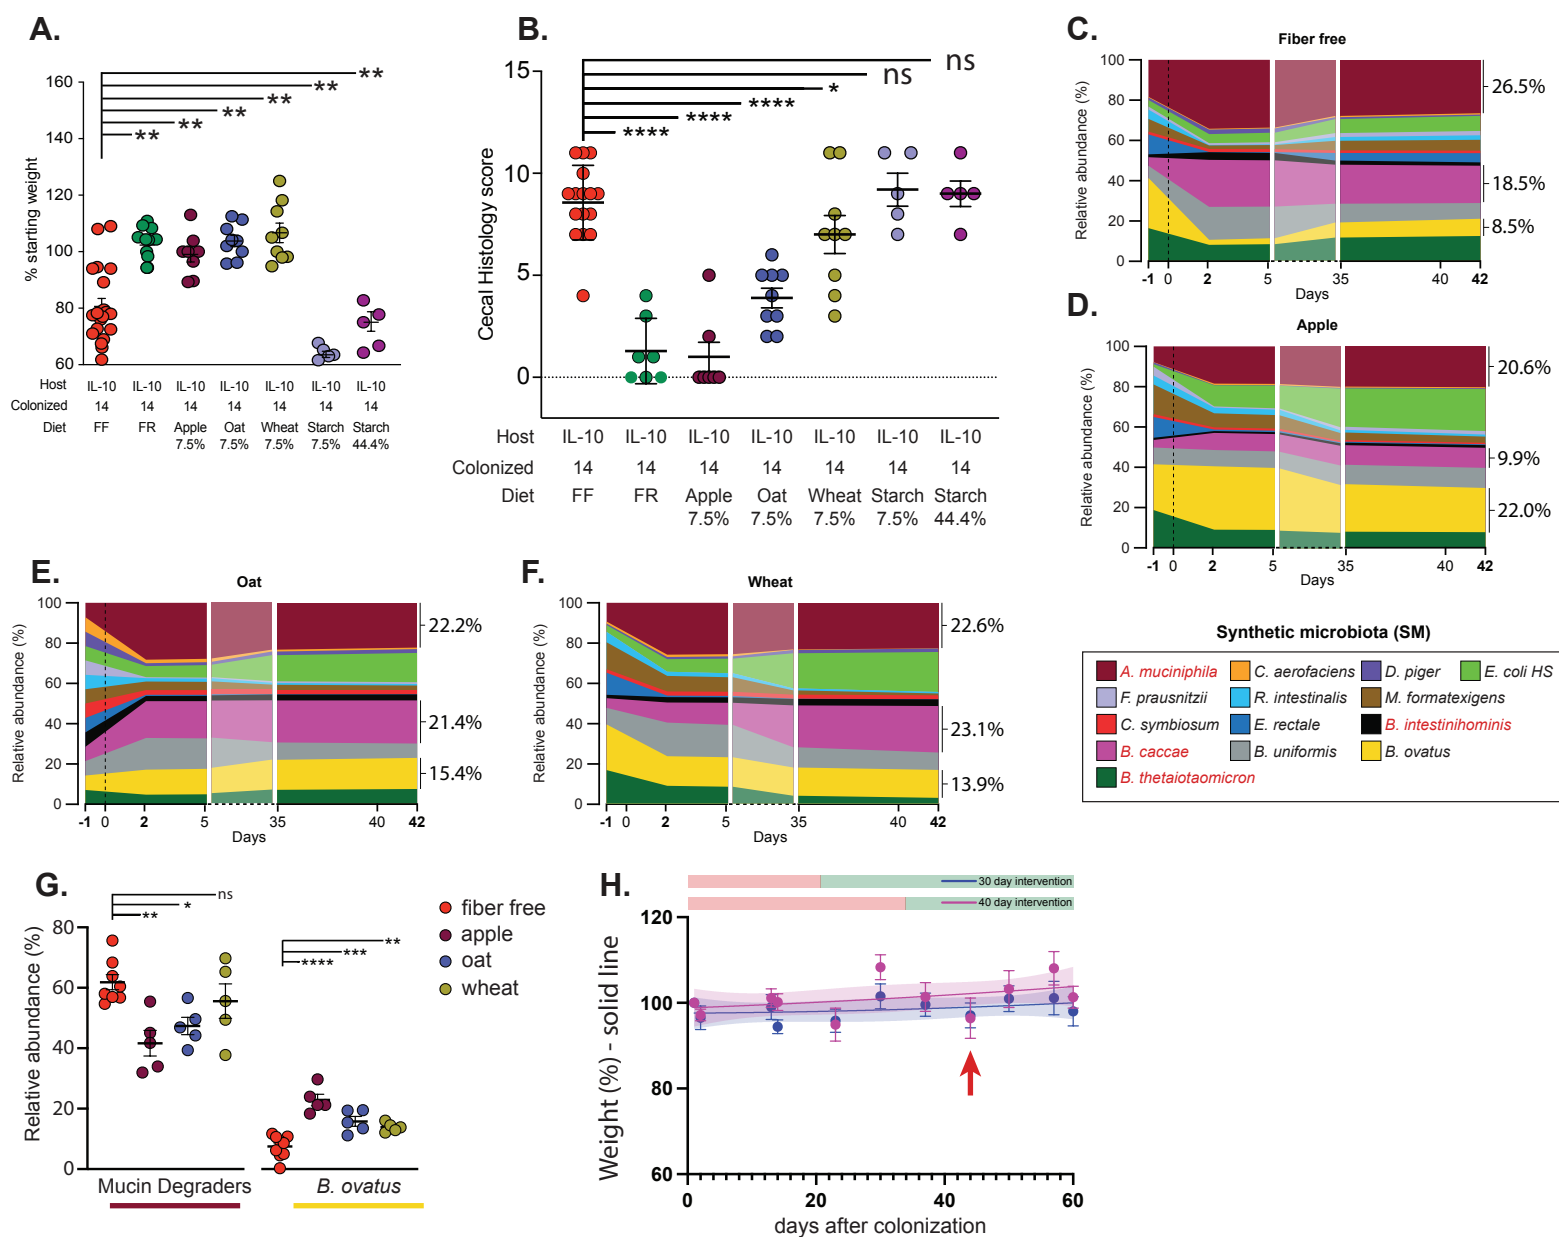

**Extended Data Figure 2. Fiber supplementation reduces inflammation severity.** **A.** Endpoint weights of mice fed variations of the FF diet with glucose replaced by fiber from apple, oat or wheat, or soluble starch. Fiber or starch were added at the concentrations listed below each treatment and an equal amount of glucose was omitted. Bold horizontal bar represents the mean and lighter error bars the S.E.M. (n=5–20, two-way ANOVA and post hoc test with Original FDR method of Benjamini and Hochberg) **B.** Cecal histology scores of the treatment groups shown in A. (n=5–20, two-way ANOVA and post hoc test with Original FDR method of Benjamini and Hochberg) **C.–F.** Relative abundance streamplots of the SM14 bacteria in IL10<sup>-/-</sup> mice fed fiber-enriched versions of the FF diet and containing either no added fiber (C.) or purified fiber from apple (D.), oat (E.) or wheat (F.). Relative abundance values for *A. muciniphila*, *B. caccae* and *B. ovatus* are shown next to each plot. **G.** Relative abundance comparison of all 4 mucin degraders compared to the fiber-degrader *B. ovatus* in adult mice colonized with SM14 and fed FF or the fiber supplemented diets. Note that the apple diet which had the lowest inflammation had the largest increase in *B. ovatus* and the largest decrease in mucin degrading bacteria. (n=5–8, two-way ANOVA and post hoc test with Original FDR method of Benjamini and Hochberg) **H.** Weight trajectories of the mice that were returned to the FR diet at either 30d or 40d. H. Weight trajectories of the mice shown in Fig. 1N, showing that no observable weight loss occurred prior to 30d or 40d fiber interventions.



# Figure ED3

bioRxiv preprint doi: <https://doi.org/10.1101/2022.04.03.486886>; this version posted January 26, 2023. The copyright holder for this preprint (which was not certified by peer review) is the author/funder. All rights reserved. No reuse allowed without permission.

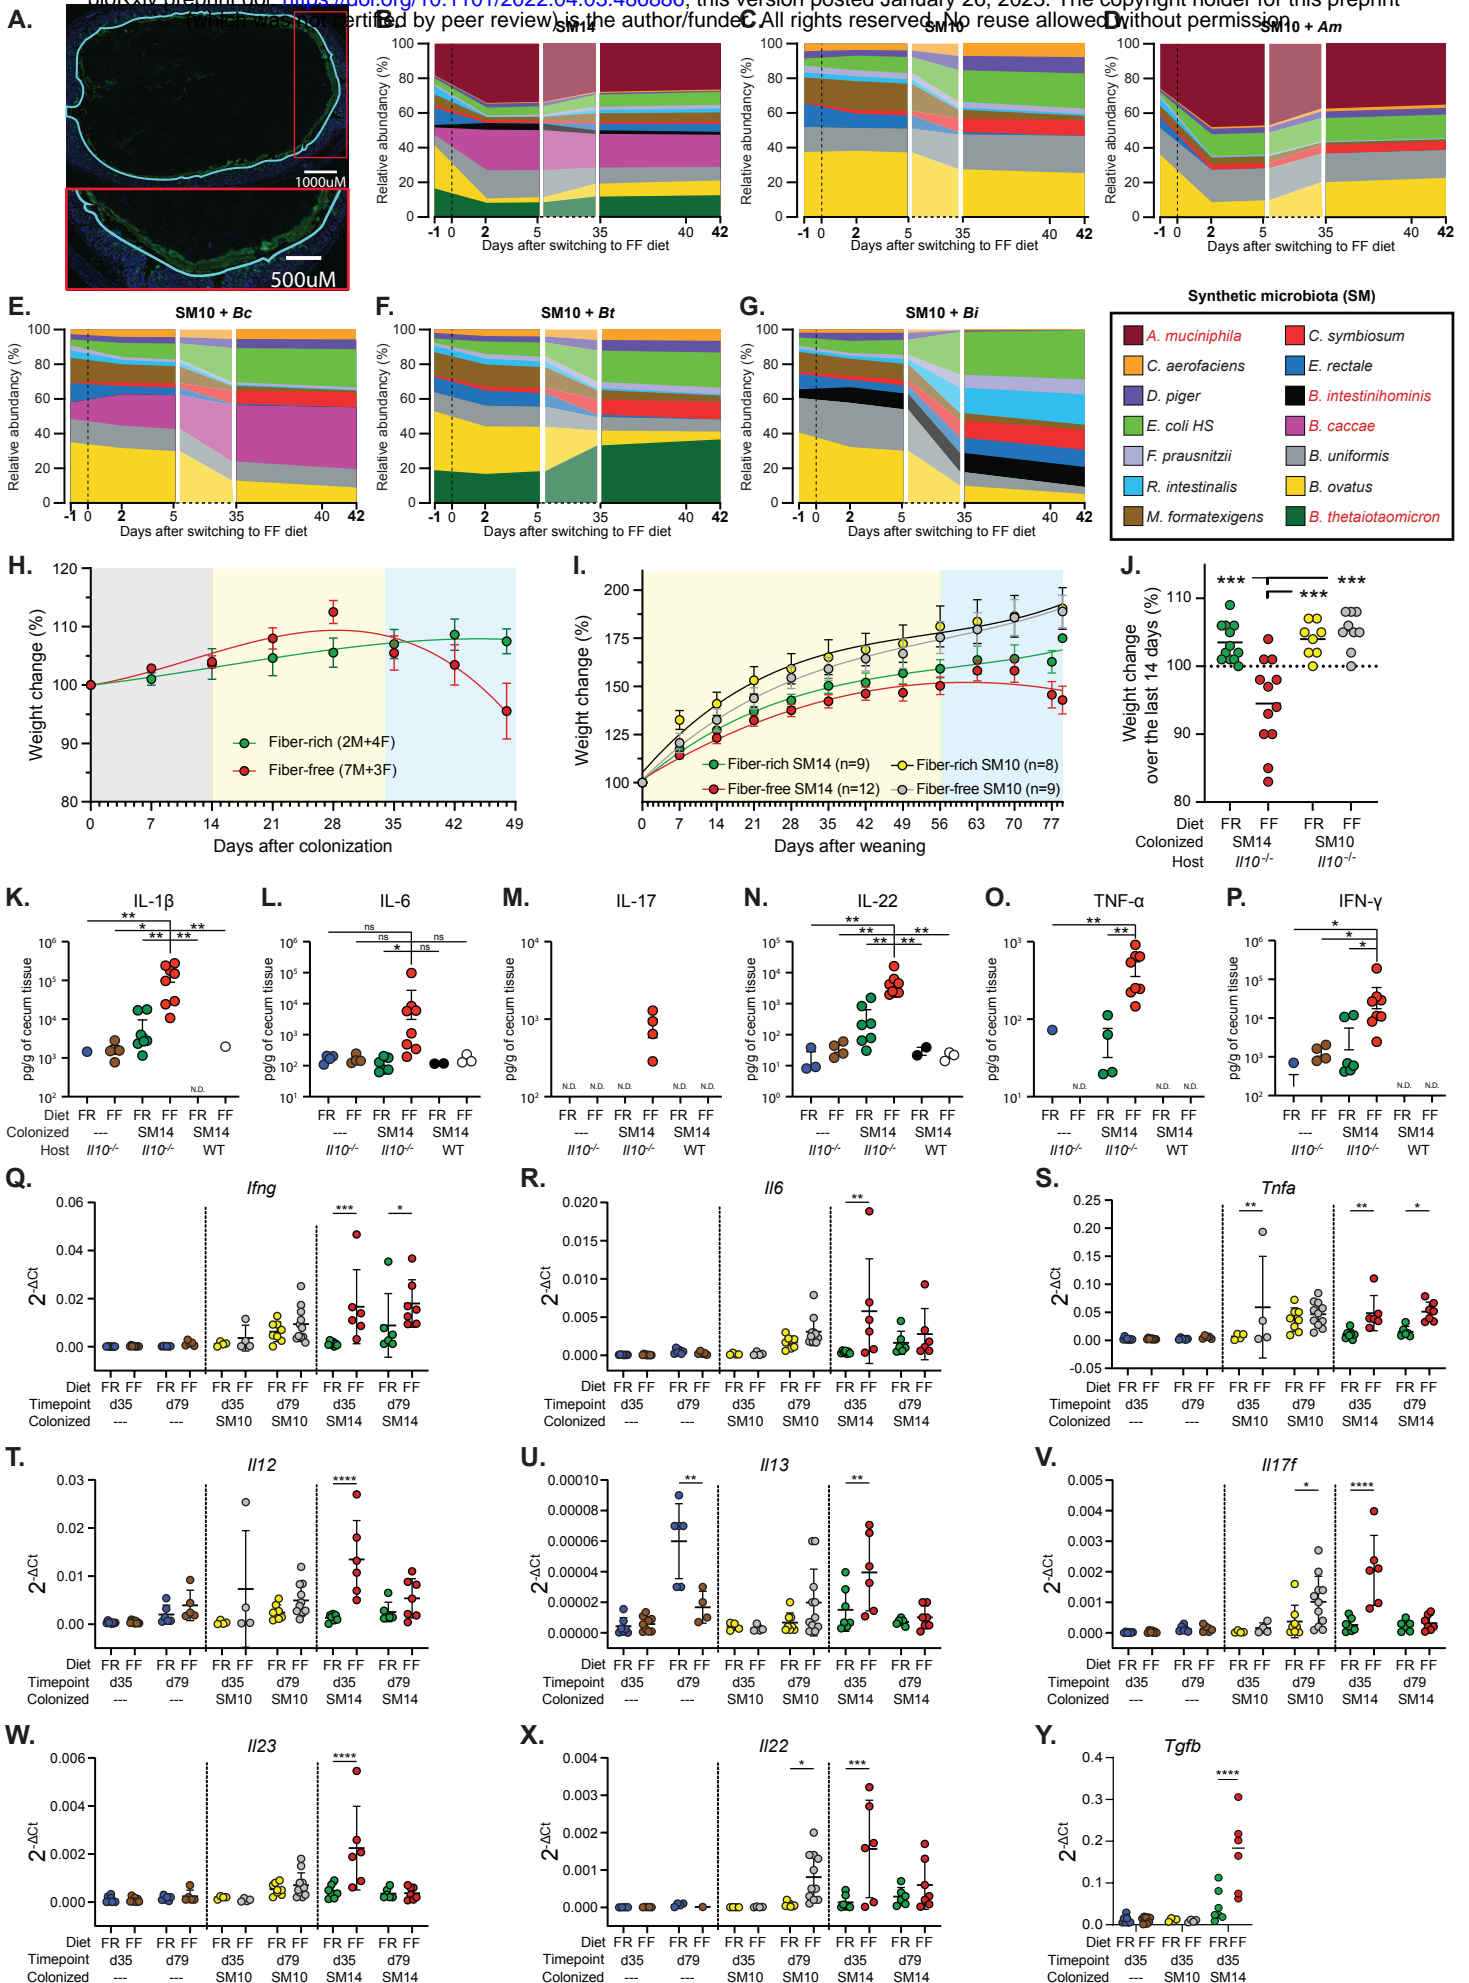



**Extended Data Figure 3. Elimination of mucin-degrading bacteria reduces inflammation development.** **A.** Representative mucus staining for SM10 colonized mice used to measure thickness with Bacspace software.  $\alpha$ -Muc2: green, DAPI: blue, prediction of epithelium/mucus interface: teal. **B.-G.** Relative abundance streamplots of the SM14 Il10<sup>-/-</sup> mice with all bacteria present (B.), SM10 (C.), SM10 + *A. muciniphila* (D.), SM10 + *B. caccae* (E.), SM10 + *B. thetaiotaomicron* (F.), SM10 + *B. intestinihominis* (G.). **H.** Endpoint weights of mice with reduced presence of mucin-degrading species. **I.** Weight trajectories of SM14 colonized adult Il10<sup>-/-</sup> mice reproduced in a separate mouse facility (University of Luxembourg). **J.** Weight trajectories of SM14 and SM10 colonized Il10<sup>-/-</sup> mice born to colonized dams and reproduced in a separate mouse facility (University of Luxembourg). **K.** Endpoint weight of individual animals shown in J. **K.-P.** Cytokine measurements by Luminex bead assay for wild-type and Il10<sup>-/-</sup> mice with various colonization and diet treatment shown in main text Figure 1. **Q-Y.** Cytokine mRNA expression in the cecum of Il10<sup>-/-</sup> pups fed FF or FR diets. (n=4-11, two-way ANOVA and post hoc test with Original FDR method of Benjamini and Hochberg). Data are represented as mean  $\pm$  SD. \*p < 0.05; \*\*p < 0.01; \*\*\*p < 0.001; \*\*\*\*p < 0.0001.

## Figure ED4

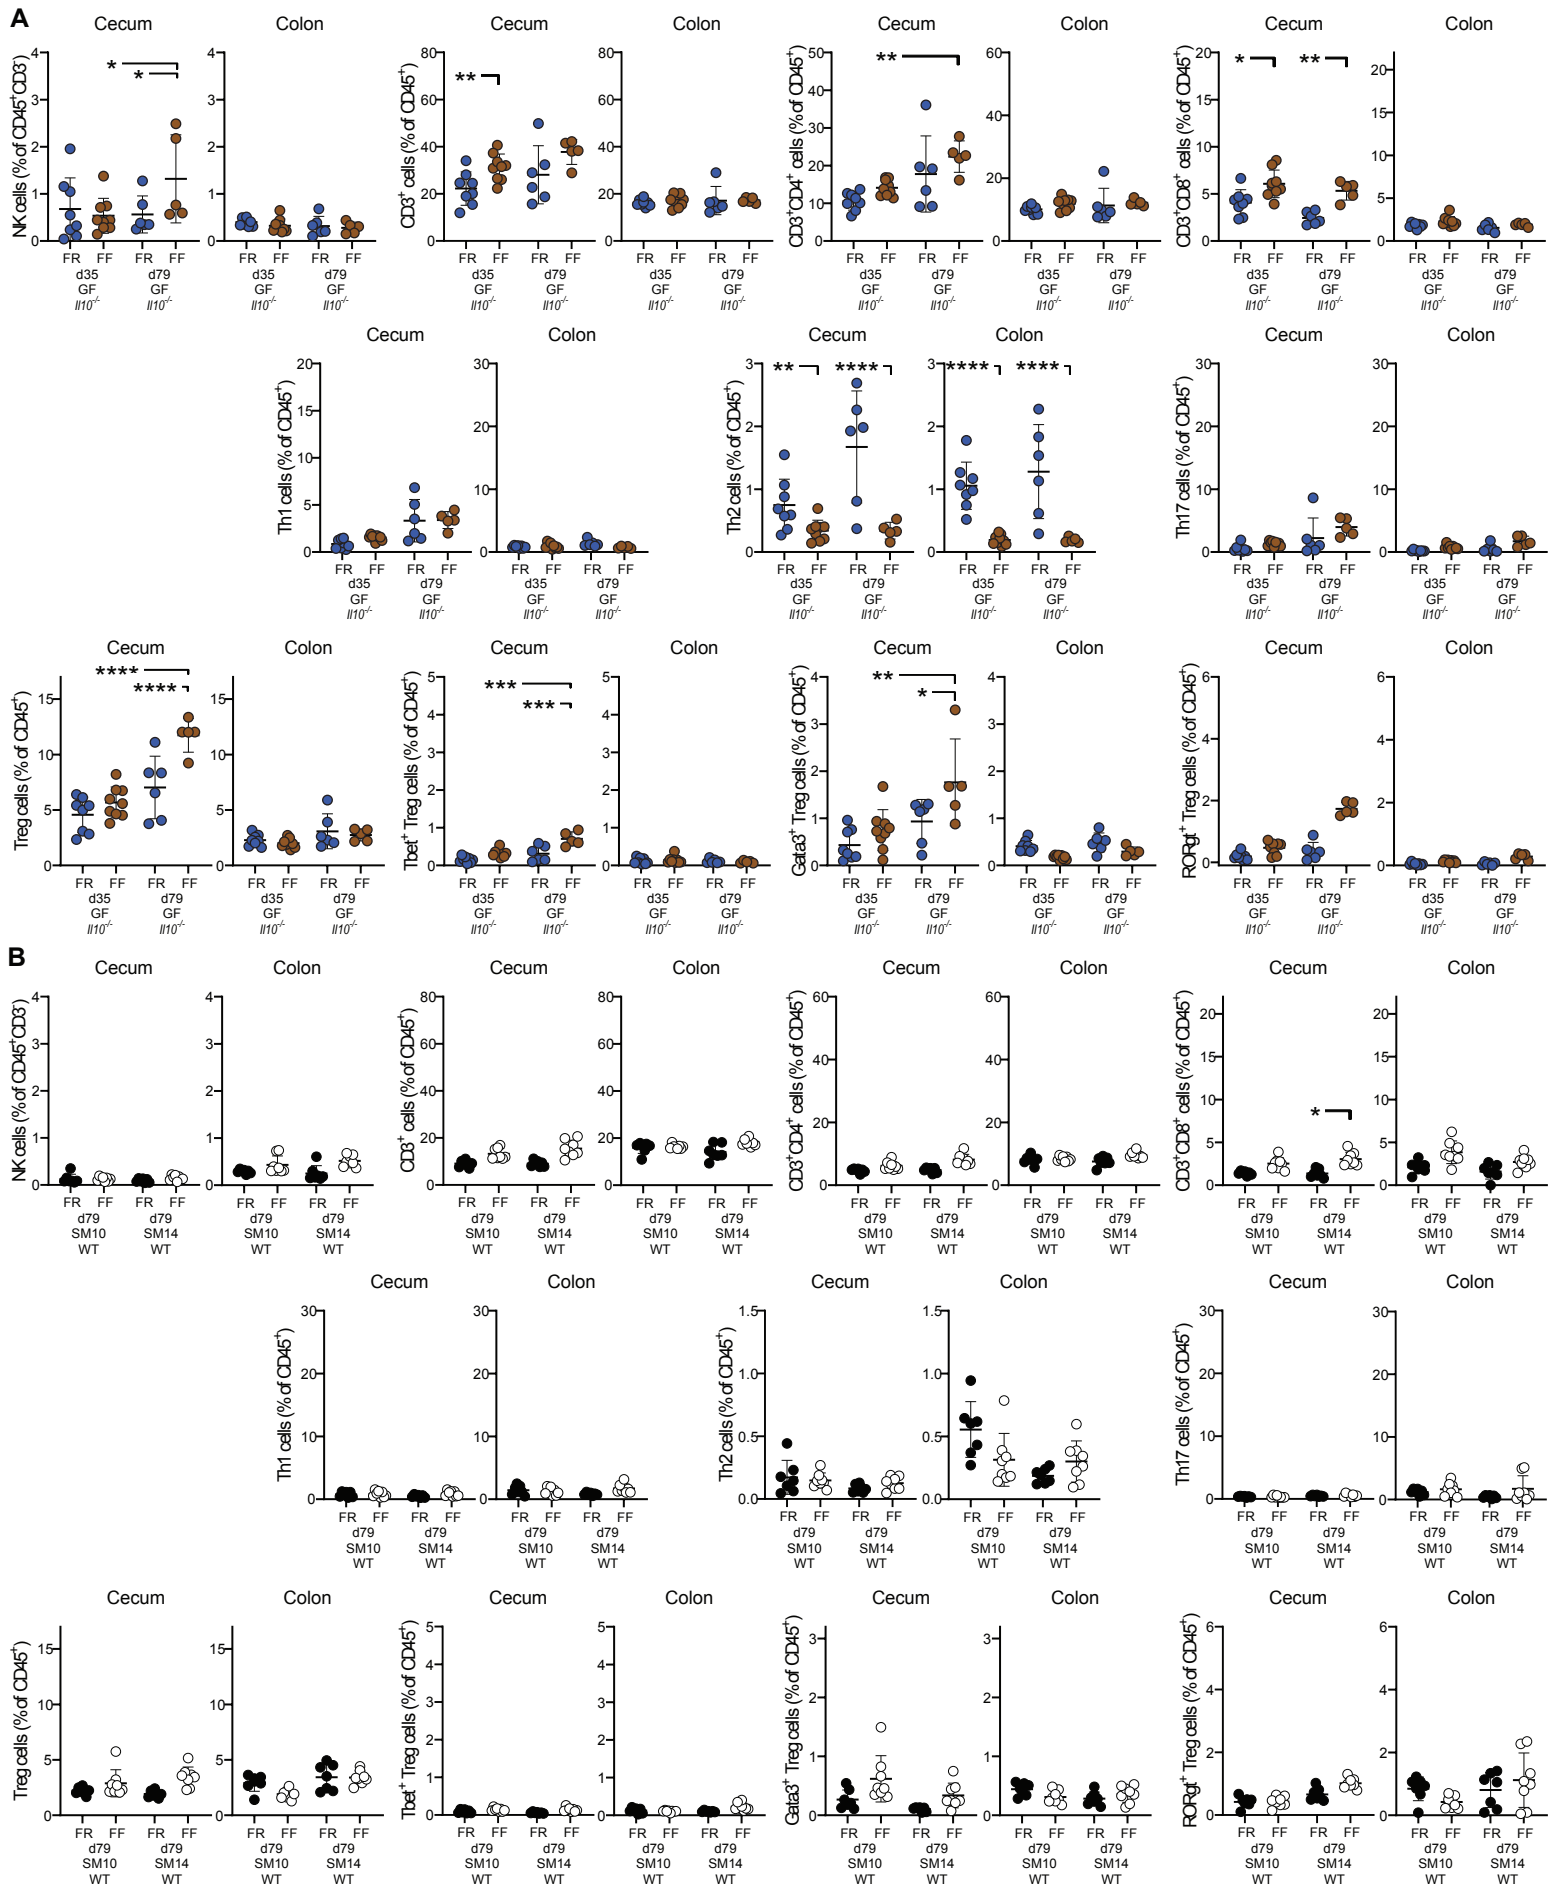

**Extended Data Figure 4. Fiber deprivation does not cause colitis in the absence of genetic predisposition and the microbiota. A.–B.** Proportion of immune cell populations in the cecum and colon of: **A.** Germfree (GF) Il10<sup>-/-</sup> mice and **B.** SM14- or SM10-colonized WT mice (n=5–9, two-way ANOVA and post hoc test with Original FDR method of Benjamini and Hochberg). Data are represented as mean ± SD and. For each cell population, data were analyzed along with data from Fig. 3 and S5. \*p < 0.05; \*\*p < 0.01; \*\*\*p < 0.001; \*\*\*\*p < 0.0001.

## Figure ED5

**A**

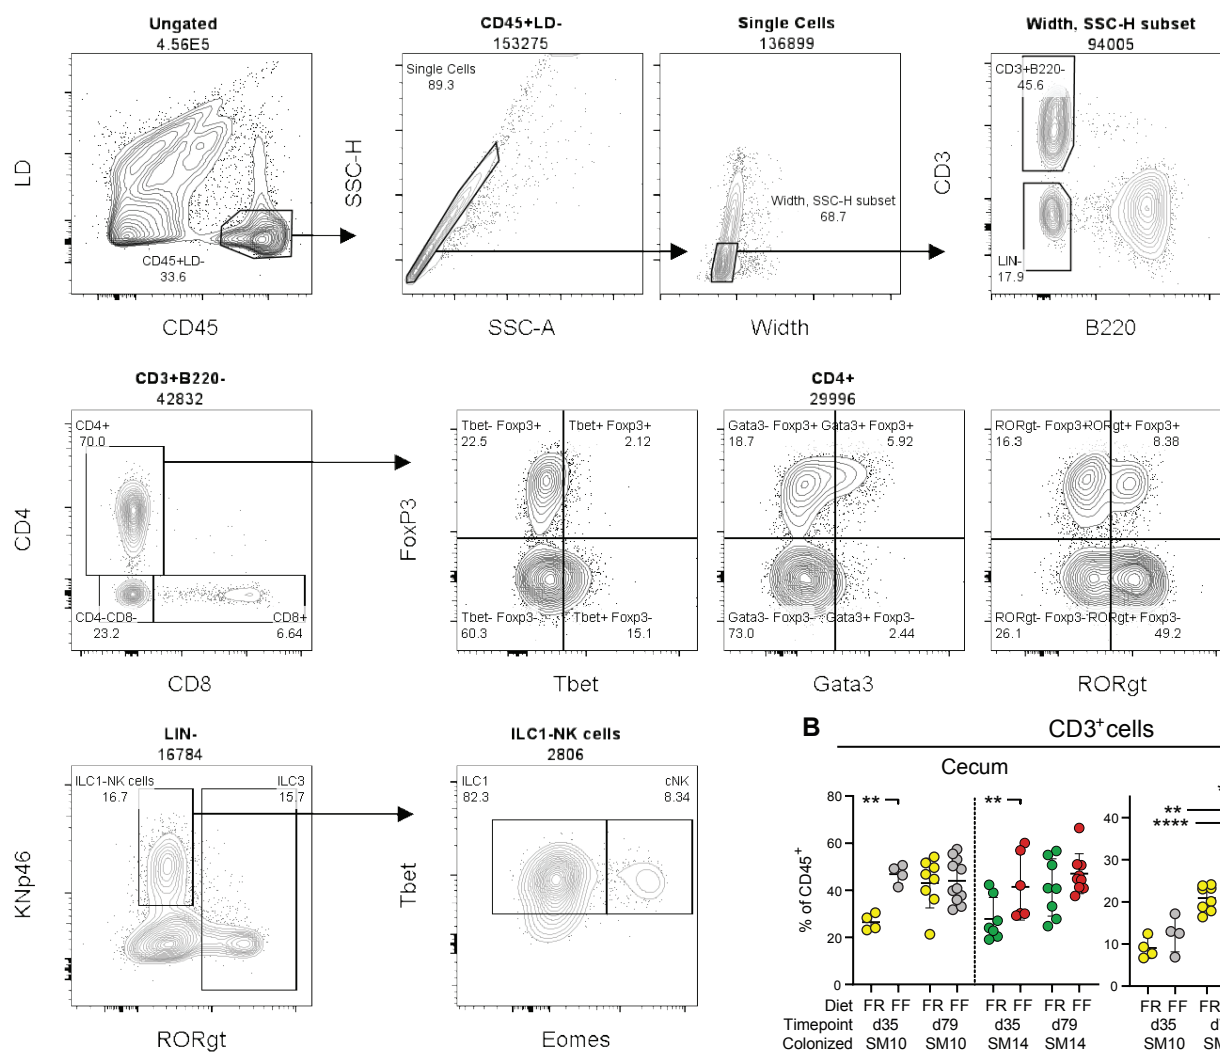

**B**

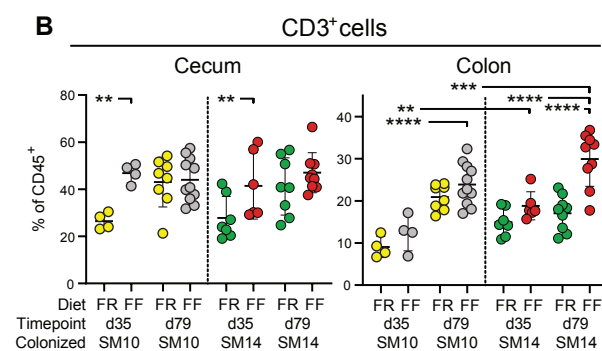

**C**

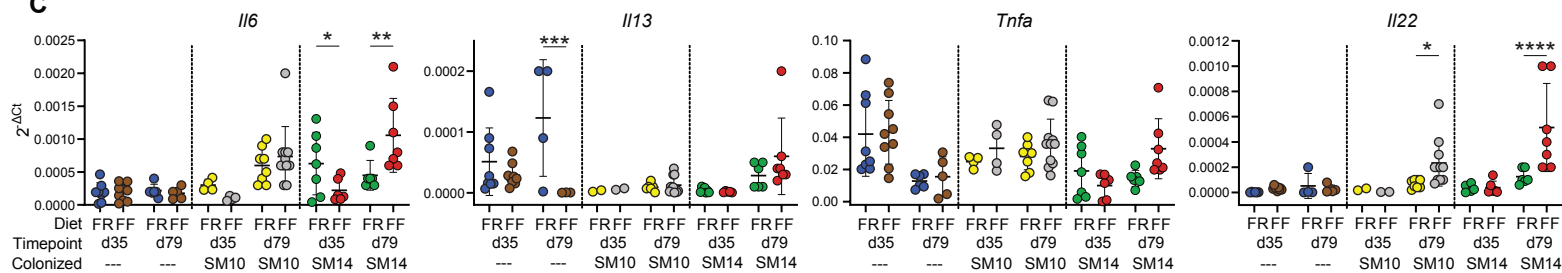

**D**

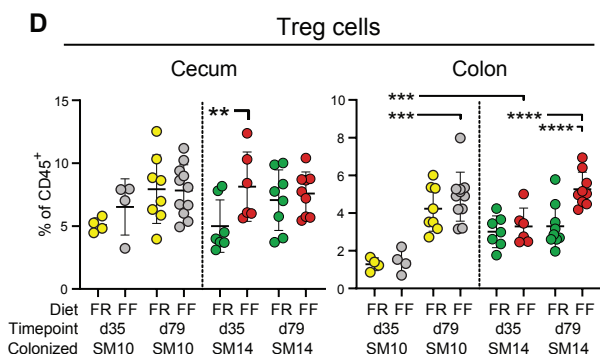

**E**

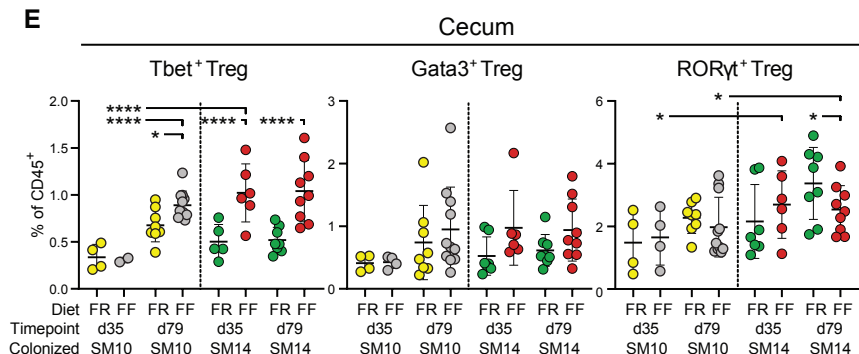

**Extended Data Figure 5. Mucin-degrading bacteria promote Th1 immune responses in a diet-dependent manner.** **A.** Gating Strategy for the analysis of T cells and NK cells in the cecal and colonic lamina propria. **B.** Proportion of CD3<sup>+</sup> cells among CD45<sup>+</sup> cells in the cecum and colon of SM10- and SM14-colonized Il10<sup>-/-</sup> mice (n=4–11, two-way ANOVA and post hoc test with Original FDR method of Benjamini and Hochberg). **C.** Cytokine mRNA levels in the Mesenteric Lymph Nodes (MLN) of Il10<sup>-/-</sup> mice (n=2–11, two-way ANOVA and post hoc test with Original FDR method of Benjamini and Hochberg). **D.–E.** Proportion of cecal and colonic regulatory T cells and (D.) and cecal regulatory T cell subsets (E.) among CD45<sup>+</sup> cells in SM10- and SM14-colonized Il10<sup>-/-</sup> mice (n=4–11, two-way ANOVA and post hoc test with original FDR method of Benjamini and Hochberg). Data are represented as mean ± SD. \*p < 0.05; \*\*p < 0.01; \*\*\*p < 0.001; \*\*\*\*p < 0.0001.





**Extended Data Figure 6. Fiber deprivation alters IgA–bacteria interactions. A.–B.** Proportion of B cells (B220+), plasma cells (CD138+), IgD- and IgG-producing cells among CD3-CD45+ cells in the cecum (A.) and colon (B.) of GF, SM10- and SM14-colonized Il10<sup>-/-</sup> and WT mice (n=4–11, two-way ANOVA and post hoc test with Original FDR method of Benjamini and Hochberg). **C.** Percentages of total (top), IgAhigh (middle) and IgALow (bottom) -coated bacteria as shown in (C) in the feces of SM10-, SM14- or SPF-colonized Il10<sup>-/-</sup> mice and SM14-colonized WT mice fed the FR or the FF diet for 21 days (n=5–8, two-way ANOVA and post hoc test with the two-stage linear step-up procedure of Benjamini, Krieger and Yekutieli). Data are represented as mean ± SD. \*p < 0.05; \*\*p < 0.01; \*\*\*p < 0.001; \*\*\*\*p < 0.0001.

## Figure ED7

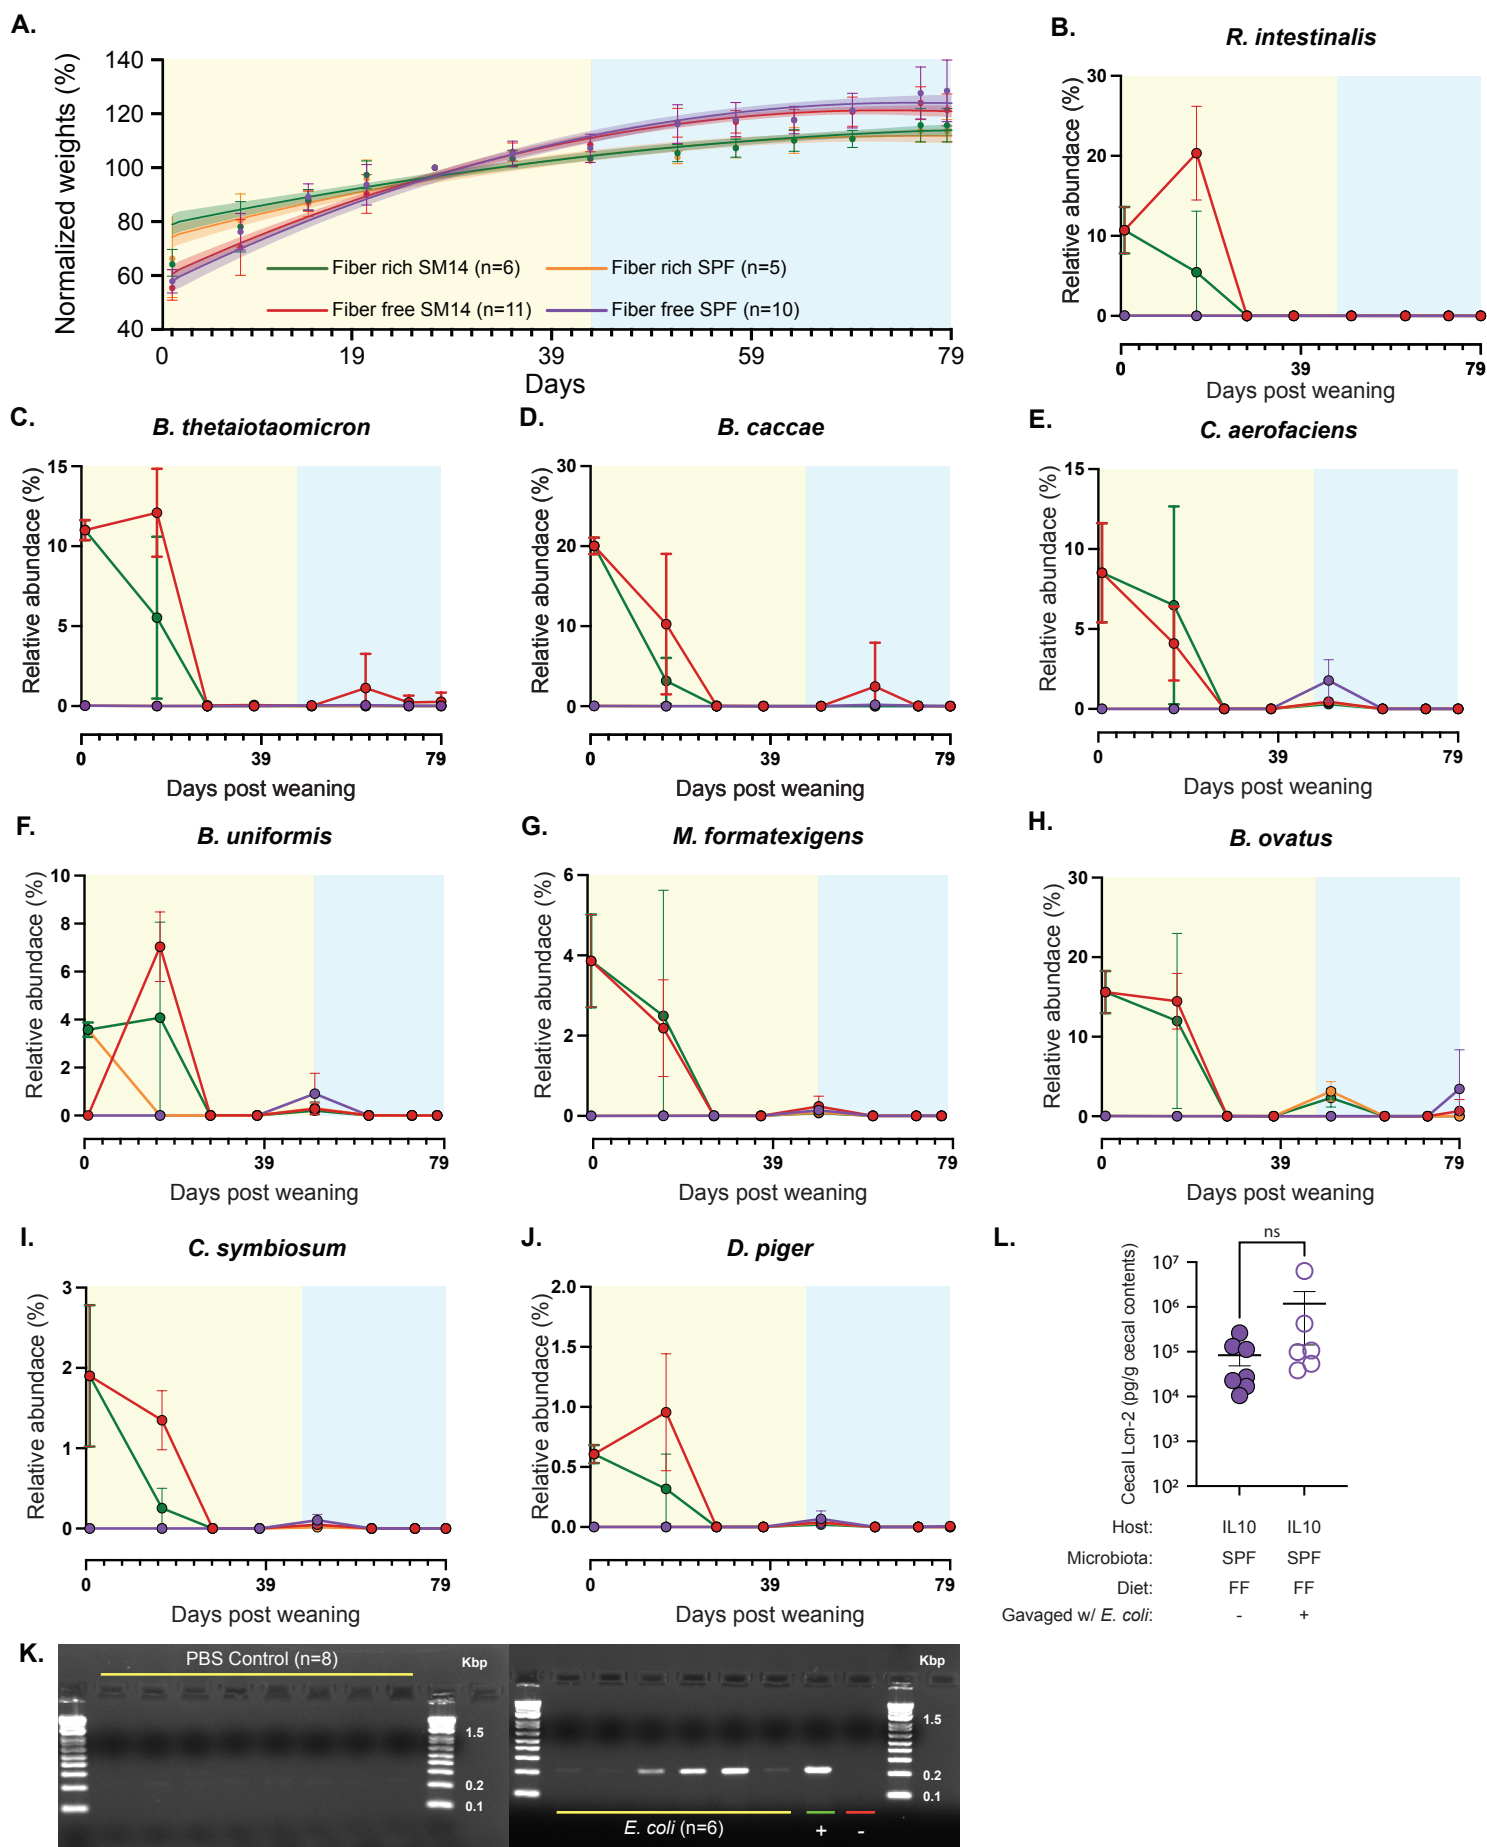

**Extended Data Figure 7. Effects of co-housing SM14 and SPF mice fed FR and FF diets. A.**

Weight trajectories of SM14 or SPF colonized mice that were co-housed at weaning (21d) with pups harboring the opposite colonization (SM14 vs. SPF), noting the weight loss typically observed in SM14/FF mice is eliminated. **B.-J.** 16S rRNA gene based measurements of the remaining SM14 bacteria in co-housed mice: *R. intestinalis* (B.), *B. thetaiotaomicron* (C.), *B. caccae* (D.), *C. aerofaciens* (E.), *B. uniformis* (F.), *M. formatexigens* (G.), *B. ovatus* (H.), *C. symbiosum* (I.) and *D. piger* (J.). **L.** Cecal lipocalin measurements in SPF mice that were gavaged weekly with *E. coli* HS and fed the FF diet. (n=6-7, one-sample Student's t-test and Wilcoxon test). **K.** PCR analysis using *E. coli* HS specific primers [12] for the presence of *E. coli* HS in mice that were mock gavaged weekly with PBS (left) or *E. coli* HS (right).

## Figure ED8

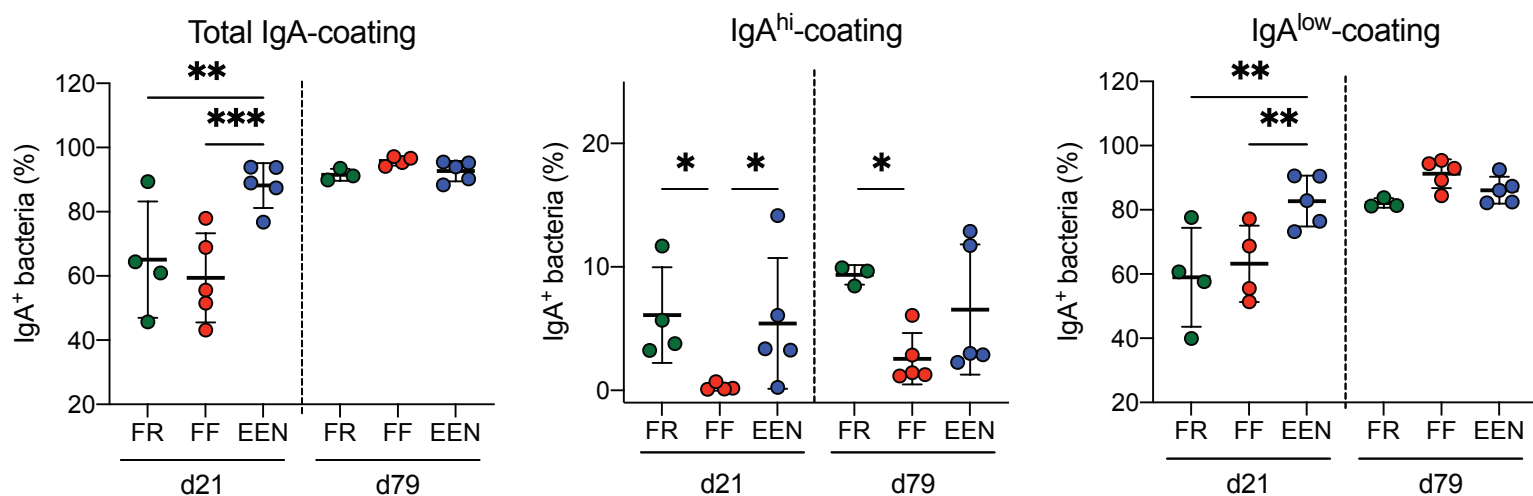

**Extended Data Figure 8. The EEN diet affects IgA coating differently than FR and FF feeding.** Percentages of total (left), IgA<sup>high</sup> (middle) and IgA<sup>low</sup> (right) -coated bacteria as shown in Fig. 4C in the feces of SM14-colonized *Il10*<sup>-/-</sup> mice fed the FR, FF or EEN diet for 21 or 79 days (n=3–5, two-way ANOVA and post hoc test with the two-stage linear step-up procedure of Benjamini, Krieger and Yekutieli). Data are represented as mean ± SD. \*p < 0.05; \*\*p < 0.01; \*\*\*p < 0.001.

**Table S1. Nutritional and ingredient comparison between fiber free (FF) diet and Exclusive Enteral Nutrition diet Nestle Nutren 1.5**

|                             | Fiber free (FF) diet (% kcal from)                              | Nestle Nutren 1.5 (% kcal from)                                 |
|-----------------------------|-----------------------------------------------------------------|-----------------------------------------------------------------|
| <b>Protein</b>              | 23.6                                                            | 18                                                              |
| <b>Fat</b>                  | 34                                                              | 35                                                              |
| <b>Carbohydrate (total)</b> | 42.4                                                            | 47                                                              |
| <b>Total:</b>               | <b>100</b>                                                      | <b>100</b>                                                      |
| <br>                        |                                                                 |                                                                 |
| *Fiber %                    | 8                                                               | 0                                                               |
| Accessible fiber%           | 0                                                               | 0                                                               |
| <br>                        |                                                                 |                                                                 |
| <b>Main ingredients:</b>    | glucose (44.4%)                                                 | corn syrup (glucose/fructose)                                   |
| (Descending order)          | casein (26.9%)                                                  | maltodextrin                                                    |
|                             | fat from corn oil (7.5%), lard (7.5%)                           | canola oil                                                      |
|                             | cellulose (8%)                                                  | soy protein isolate                                             |
|                             |                                                                 | sodium caseinate                                                |
|                             |                                                                 | medium chain triglycerides (<2%)                                |
|                             |                                                                 | calcium caseinate                                               |
|                             | (vitamin, minerals, antioxidants,<br>and stabilizers not shown) | (vitamin, minerals, antioxidants,<br>and stabilizers not shown) |

\*Note the only fiber added to the FF diet is crystalline cellulose as a bulking agent and is not known to be accessible by any SM14 bacteria.
